# Supplementary material for: Assessment of three risk evaluation systems for patients aged ≥70 in East China: performance of SinoSCORE, EuroSCORE II and the STS risk evaluation system
Source: PeerJ. 2018 Feb 23;6:e4413. doi: 10.7717/peerj.4413 (PMC5827670; doi:10.7717/peerj.4413)
Supplement: Supplemental Information 1 [file peerj-06-4413-s001.xlsx]

## Sheet: sheet 1
Pt No	Age	Age >=70:1<70:2	Sex M1F2	Weight [kg]	Height [cm]	NYHA	CAD1:stabel angina2:unstable angina3:MI	Hypertension	DM	stroke	Ccr	ECCR	EF	diseased vessels	PAD	Emergent0:elective1:urgent2:salvage	Valvular heart disease	IABP0:no1:preoperative2:intraoperative3:postoperative	COPD	AF	PAH	other Heart Surgery history	BMI	BSA	Renal Failure	Obesity	Operative Dead	grafts	Critical conditions	euro	sino	STS
1	66	2	1	78	165	2	1	1	0	0	91	77.885	61	3	0	2	0	0	0	0	0	0	28.6501	1.852	0	0	0	3	1	1.16	7.31	0.768
2	71	1	1	51	160	2	2	1	0	0	83	52.0607	60.8	3	0	2	0	0	0	0	0	0	19.9219	1.4759	0	0	0	4	1	1.79	7.69	1.05
3	66	2	2	55	157	1	2	1	1	0	45	94.3995	55.2	3	0	1	1	0	0	0	0	0	22.3133	1.5088	0	0	0	4	1	2.51	0.71	0.179
4	55	2	1	79	169	2	3	1	0	0	120	68.7122	59.5	3	0	0	1	0	0	0	0	0	27.6601	1.8892	0	0	0	3	0	1.65	0.89	0.933
5	66	2	1	68	173	2	1	1	0	0	79	78.2136	62.9	3	0	0	1	0	0	0	0	0	22.7204	1.7728	0	0	0	2	0	1.39	4.75	0.477
6	68	2	1	51	156	2	2	1	0	0	64	70.4517	65.1	2	0	0	0	0	0	0	0	0	20.9566	1.4515	0	0	0	2	0	2	0.71	1.195
7	58	2	1	68	165	2	1	1	1	0	61	112.244	52	3	0	1	1	0	0	0	0	0	24.977	1.724	0	0	0	3	1	1.28	0.88	0.559
8	64	2	1	70	167	1	2	1	0	0	74	88.2773	50.9	1	0	0	1	0	0	0	0	0	25.0995	1.7618	0	0	0	3	0	1.12	1.16	0.859
9	68	2	1	63	163	1	1	1	1	0	72	77.3588	58.9	3	0	0	0	0	0	0	0	0	23.7118	1.6478	0	0	0	4	0	1.81	0.69	0.602
10	53	2	1	60	152	4	2	0	1	0	132	48.5585	33.2	3	0	0	0	0	0	0	0	0	25.9695	1.5423	0	0	0	3	0	3.51	1.47	1.536
11	79	1	1	65	170	3	2	1	0	0	90	54.0966	62.1	3	0	0	0	0	0	0	0	0	22.4913	1.7161	0	0	0	2	0	2.27	0.93	0.78
12	71	1	2	65	155	1	2	0	0	0	65	72.0173	56.1	3	0	0	1	0	0	0	0	0	27.0552	1.6246	0	0	0	3	0	2.76	0.58	1.046
13	66	2	2	48	153	2	2	0	0	0	53	69.9495	25.6	2	0	0	0	0	0	0	0	0	20.5049	1.3948	0	0	0	2	1	2.95	0.89	1.552
14	65	2	1	68	168	3	2	0	0	0	79	79.2706	63.3	3	0	0	0	0	0	0	0	0	24.093	1.7423	0	0	0	4	0	1.43	0.92	0.607
15	65	2	1	61	168	1	2	1	0	0	76	73.9174	58.9	3	0	0	0	0	0	0	0	0	21.6128	1.6527	0	0	0	1	0	1.37	0.48	0.779
16	61	2	1	68	165	2	2	1	0	0	69	95.5995	60	3	0	2	0	0	0	0	0	0	24.977	1.724	0	0	0	4	1	2.73	4.64	1.073
17	61	2	2	67	163	2	2	0	0	0	56	98.651	51.7	3	0	0	0	0	0	0	0	0	25.2174	1.699	0	0	0	2	0	1.26	0.78	0.812
18	53	2	1	72	165	2	2	1	1	0	61	126.093	61	3	0	0	0	0	0	0	0	0	26.4463	1.7752	0	0	0	4	0	0.88	0.47	0.59
19	70	1	1	63	158	2	3	1	1	0	103	52.5739	63.6	3	0	0	0	0	0	0	0	0	25.2363	1.6173	0	0	0	4	0	3.64	2.72	1.753
20	73	1	1	84	179	3	2	1	1	0	79	87.4774	45.9	3	0	0	0	0	0	0	0	0	26.2164	2.0142	0	0	0	4	0	2	1.49	1.633
21	76	1	1	64	176	2	2	1	0	0	115	43.7352	61.4	3	0	1	0	0	0	0	0	0	20.6612	1.7399	0	0	0	4	1	2.56	0.71	1.956
22	65	2	1	69	166	1	1	0	0	0	104	61.1007	62.6	2	0	1	0	0	0	0	0	0	25.0399	1.7429	0	0	0	2	1	1.21	0.37	0.616
23	64	2	1	87	170	2	2	1	1	0	87	93.3217	66.3	3	0	1	0	0	0	0	0	0	30.1038	1.9977	0	1	0	3	1	1.28	0.42	0.598
24	62	2	1	70	165	1	2	0	0	0	76	88.2161	46.1	3	0	0	1	2	0	0	0	0	25.7117	1.7496	0	0	0	2	0	0.65	0.7	0.178
25	66	2	1	75	164	2	3	0	0	0	55	123.908	34.2	3	0	0	0	0	0	0	0	0	27.8852	1.8075	0	0	0	4	0	1.88	0.61	0.707
26	67	2	1	79	166	2	2	1	1	0	61	116.088	62.4	3	0	0	0	0	0	0	0	0	28.6689	1.8709	0	0	0	5	0	1.47	0.86	0.829
27	52	2	1	70	163	2	2	1	1	0	56	135.071	58.9	3	0	0	0	0	0	0	0	0	26.3465	1.7374	0	0	0	4	0	0.88	0.95	0.822
28	71	1	2	69	151	2	1	1	0	0	91	54.6065	61	3	0	0	0	0	0	0	0	0	30.2618	1.6514	0	1	0	3	0	2.11	0.79	1.179
29	49	2	1	75	167	2	2	1	0	0	91	92.0938	61.4	3	0	1	0	0	0	0	0	0	26.8923	1.8258	0	0	0	4	1	0.76	0.47	0.339
30	76	1	1	72	160	2	2	1	0	0	74	76.4627	39.8	3	0	0	1	0	0	0	0	0	28.125	1.7447	0	0	0	2	0	2.4	0.69	1.102
31	75	1	1	78	167	2	1	1	0	0	69	90.2252	61	3	0	0	0	0	0	0	0	0	27.968	1.8642	0	0	0	4	0	1.65	2.33	1.058
32	56	2	1	61	167	1	2	0	1	0	65	96.7976	65.8	2	0	2	0	0	0	0	0	0	21.8724	1.6466	0	0	0	2	1	1.25	3.16	0.752
33	69	2	1	69	168	2	2	0	0	0	92	65.3866	42	3	0	0	0	0	0	0	0	0	24.4473	1.7551	0	0	0	3	0	1.62	1.22	0.697
34	47	2	1	55	153	2	3	0	0	0	62	101.303	65	3	0	2	0	0	0	0	0	0	23.4952	1.4844	0	0	0	4	1	1.48	2.69	0.874
35	55	2	1	86	179	1	1	0	1	0	68	132.001	60	3	0	1	0	0	0	0	0	0	26.8406	2.0398	0	0	0	3	1	0.79	0.58	0.473
36	62	2	1	69	168	2	1	1	0	0	79	83.6538	60	3	0	0	0	0	0	0	0	0	24.4473	1.7551	0	0	0	3	0	0.97	0.82	1.167
37	78	1	2	45	153	2	2	0	0	0	54	53.926	73.8	3	0	0	0	0	0	0	0	0	19.2234	1.3564	0	0	0	3	0	2.13	0.59	2.652
38	75	1	1	81	183	2	2	1	0	0	114	56.7104	67.3	3	0	0	0	0	0	0	0	0	24.187	2.0002	0	0	0	4	0	2.17	1.03	0.845
39	68	2	1	62	168	2	2	1	0	0	77	71.1873	61.9	3	0	0	0	0	0	0	0	0	21.9671	1.6655	0	0	0	3	0	1.57	1.9	1.293
40	72	1	1	70	164	4	2	1	1	0	81	72.1591	32.2	3	0	0	0	0	0	0	0	0	26.0262	1.7435	0	0	0	4	0	3.47	0.68	2.039
41	75	1	1	71	164	2	2	1	0	0	124	45.7003	60	3	0	0	0	0	0	0	0	0	26.398	1.7563	0	0	0	4	0	2.33	0.61	1.555
42	67	2	1	62	165	1	2	0	0	0	84	66.1613	68	3	0	0	0	0	0	0	0	0	22.7732	1.6472	0	0	0	4	0	1.57	1.01	0.84
43	73	1	1	56	158	3	2	1	0	0	74	62.2587	43.2	3	0	0	0	0	0	0	0	0	22.4323	1.5277	0	0	0	3	0	3.41	0.7	3.274
44	75	1	1	76	176	2	2	1	0	0	217	27.9535	64.7	3	0	0	0	0	0	0	0	0	24.5351	1.8935	1	0	0	3	0	3.31	2.4	3.952
45	67	2	1	76.5	173	2	1	1	0	0	102	67.2284	48.4	3	0	0	0	0	0	0	0	0	25.5605	1.8816	0	0	0	3	0	1.29	0.66	0.576
46	69	2	1	62	165	2	2	1	1	0	65	83.1583	60.7	3	0	0	0	0	0	0	0	0	22.7732	1.6472	0	0	0	3	0	2.03	1.58	0.21
47	58	2	1	76	175	2	2	1	0	0	84	91.0997	38.3	3	0	0	0	0	0	0	0	0	24.8163	1.8874	0	0	0	3	0	0.97	0.74	0.67
48	64	2	1	90	177	2	3	1	1	0	75	111.986	49.3	3	0	0	0	0	0	0	0	0	28.7274	2.0788	0	0	0	3	0	1.56	0.93	0.726
49	70	1	1	78	168	2	2	1	1	0	91	73.675	75.9	3	0	0	0	0	0	0	0	0	27.6361	1.8703	0	0	0	3	0	1.81	0.83	0.562
50	70	1	2	61	157	2	2	1	0	0	41	108.701	62.1	3	0	0	0	0	0	0	0	0	24.7475	1.5856	0	0	0	3	0	2.08	0.56	1.214
51	52	2	1	59	168	2	2	0	0	0	72	88.5464	71.1	3	0	0	0	0	0	0	0	0	20.9042	1.6271	0	0	0	3	0	0.95	0.35	0.564
52	68	2	2	75	162	1	2	1	1	0	51	110.513	68.9	3	0	0	0	0	0	0	0	0	28.578	1.7953	0	0	0	1	0	1.99	0.6	1.037
53	75	1	2	67	159	2	2	1	0	0	92	49.407	59.8	3	0	0	1	0	0	0	0	0	26.5021	1.6746	0	0	0	4	0	2.76	0.75	1.669
54	69	2	1	75	171	3	2	1	0	0	61	107.191	48	3	0	1	0	2	0	0	0	0	25.6489	1.8502	0	0	1	3	1	2.01	7.34	3.656
55	53	2	1	82	174	2	2	0	0	0	49	178.775	55.4	3	0	2	0	0	0	0	0	0	27.0842	1.9581	0	0	0	4	1	0.6	2.98	0.468
56	68	2	1	70	175	2	2	0	0	0	87	71.1345	35	3	0	0	0	0	0	0	0	0	22.8571	1.8106	0	0	0	2	0	1.66	0.94	1.567
57	75	1	2	52	151	2	1	0	1	0	71	49.6874	64.7	3	0	0	0	0	0	0	0	0	22.806	1.4338	0	0	0	2	0	1.38	0.61	0.652
58	74	1	1	75	176	2	1	1	1	1	76	79.9762	62.9	3	0	0	0	0	0	0	0	0	24.2123	1.8807	0	0	0	4	0	2.1	0.38	1.826
59	62	2	2	54	152	2	2	1	0	0	56	78.5033	61	1	0	0	0	0	0	0	0	0	23.3726	1.4655	0	0	0	3	0	1.32	0.56	0.654
60	70	1	1	57	166	3	2	1	1	0	69	71.0056	60	3	0	2	0	2	0	0	0	0	20.6852	1.5893	0	0	1	2	1	2.97	6.24	5.193
61	77	1	1	62	164	2	2	1	0	0	49	97.8825	64.3	3	0	0	0	0	0	0	0	0	23.0518	1.6411	0	0	0	3	0	2.4	0.8	1.151
62	75	1	1	56	162	2	2	1	0	0	72	62.078	67.4	3	0	0	0	0	0	0	0	0	21.3382	1.5521	0	0	0	2	0	2.31	0.6	1.56
63	66	2	1	74	172	1	2	1	0	0	89	75.5514	68.3	3	1	0	0	0	0	0	0	0	25.0135	1.8435	0	0	0	3	0	1.14	0.29	0.278
64	78	1	1	89	174	2	1	1	0	0	61	111.076	60.7	3	0	0	0	0	0	0	0	0	29.3962	2.0477	0	0	0	3	0	1.73	0.75	1.874
65	52	2	1	65	166	2	3	0	0	0	102	68.8596	63.3	3	0	0	0	0	0	0	0	0	23.5883	1.6917	0	0	0	1	0	1.28	0.52	0.421
66	67	2	2	58	150	2	2	0	1	0	50	88.383	70.4	3	1	0	0	0	0	0	0	0	25.7778	1.5045	0	0	0	3	0	2.51	0.54	2.723
67	60	2	2	65	150	2	2	1	0	0	69	78.6579	43.6	3	0	0	0	0	0	0	0	0	28.8889	1.5941	0	0	0	2	0	1.46	0.75	0.696
68	61	2	1	64	166	2	1	0	0	0	58	107.04	75	3	0	0	0	0	0	0	0	0	23.2254	1.6789	0	0	0	3	0	0.98	0.38	0.437
69	78	1	1	59	170	2	2	1	0	0	113	39.7497	69.6	3	0	0	0	0	0	0	0	0	20.4152	1.6393	0	0	0	2	0	3.03	1.32	1.728
70	72	1	1	78	167	2	2	1	1	0	60	108.548	68.7	2	0	0	0	0	0	0	0	0	27.968	1.8642	0	0	0	2	0	1.67	0.36	0.828
71	43	2	1	78	182	2	1	1	0	0	83	111.933	58.8	3	0	0	0	0	0	0	0	0	23.5479	1.9557	0	0	0	2	0	0.64	0.5	0.353
72	75	1	2	58	154	2	2	1	0	0	88	44.7143	68.5	3	0	0	0	0	0	0	0	0	24.4561	1.5289	0	0	0	3	0	3.22	2.17	1.65
73	71	1	1	70	170	2	2	1	0	0	119	49.839	63.6	3	0	0	0	0	0	0	0	0	24.2215	1.7801	0	0	0	4	0	2.15	0.58	1.03
74	75	1	1	70	168	1	3	1	0	0	72	77.5975	50	3	0	0	0	0	0	0	0	0	24.8016	1.7679	0	0	0	4	0	2.21	0.81	0.688
75	52	2	2	72	160	2	1	1	0	0	50	132.261	65.2	3	0	0	0	0	0	0	0	0	28.125	1.7447	0	0	0	1	0	0.89	1.02	1.105
76	43	2	1	63	170	2	2	0	0	0	67	111.997	64	3	0	2	0	0	0	0	0	0	21.7993	1.6905	0	0	0	3	1	0.82	2.19	0.419
77	76	1	2	62	154	2	2	1	0	0	74	55.9665	57	2	0	0	0	0	0	0	0	0	26.1427	1.5801	0	0	0	2	0	2.62	1.38	1.363
78	67	2	2	63	161	2	1	0	0	0	58	82.7605	64.7	3	0	0	0	0	0	0	0	0	24.3046	1.6356	0	0	0	3	0	1.6	0.91	0.556
79	68	2	1	55	160	2	1	0	0	0	96	50.6516	69.6	3	0	0	0	0	0	0	0	0	21.4844	1.5271	0	0	0	3	0	1.98	0.74	0.784
80	71	1	1	65	164	1	1	0	0	0	144	38.2445	53.6	3	0	0	0	0	0	0	0	0	24.1672	1.6795	0	0	0	3	0	2.6	0.63	1.579
81	77	1	1	52	163	2	1	1	0	0	71	56.6571	62.6	3	0	0	0	0	0	0	0	0	19.5717	1.507	0	0	0	3	0	2.55	1.48	2.266
82	66	2	1	66	176	1	2	1	1	0	67	89.5096	69	3	0	1	0	0	0	0	0	0	21.3068	1.7655	0	0	0	3	1	1.5	0.18	0.444
83	71	1	1	55	157	3	2	1	1	0	53	87.9235	62.6	2	0	0	0	0	0	0	0	0	22.3133	1.5088	0	0	0	3	0	3.01	1.41	2.263
84	69	2	2	62	155	1	2	1	0	0	65	70.6846	45.2	2	0	0	0	0	0	0	0	0	25.8065	1.5862	0	0	0	2	0	1.95	0.82	1.04
85	59	2	1	70	165	3	2	1	0	0	72	96.6984	62.7	3	0	0	0	0	0	0	0	0	25.7117	1.7496	0	0	0	3	0	1.1	1.9	1.26
86	52	2	1	72	170	2	1	1	1	0	58	134.139	64.4	3	0	0	0	0	0	0	0	0	24.9135	1.8057	0	0	0	2	0	0.85	0.21	0.446
87	64	2	1	65	160	3	2	1	0	0	48	126.373	56.4	3	0	0	0	0	0	0	0	0	25.3906	1.6551	0	0	0	3	0	1.47	0.93	0.917
88	75	1	1	67	165	2	1	1	1	0	68	78.6408	60.8	3	0	0	1	0	0	0	0	0	24.6097	1.7112	0	0	0	3	0	2.3	1.01	1.719
89	79	1	1	76	172	2	1	1	0	0	128	44.4736	60.8	2	0	0	0	0	0	0	0	0	25.6896	1.8691	0	0	0	2	0	2.56	0.71	2.961
90	55	2	1	71	168	2	2	1	0	0	55	134.736	57.9	3	0	0	1	0	0	0	0	0	25.1559	1.7807	0	0	0	3	0	0.98	0.54	0.308
91	69	2	1	77	174	1	1	1	0	0	64	104.891	73.1	3	0	0	0	0	0	0	0	0	25.4327	1.8941	0	0	0	2	0	1.21	0.24	0.309
92	67	2	1	65	166	2	2	1	1	0	69	84.4415	60	2	0	0	0	0	0	0	0	0	23.5883	1.6917	0	0	0	3	0	1.56	0.68	0.626
93	53	2	1	72	171	1	2	0	0	0	71	108.333	66.4	3	0	0	0	0	0	0	0	0	24.623	1.8118	0	0	0	3	0	0.76	0.55	0.342
94	71	1	1	61	165	2	2	1	0	0	76	68.004	65.8	2	0	0	0	0	0	0	0	0	22.4059	1.6344	0	0	0	3	0	1.52	1.31	1.006
95	59	2	1	68	167	2	3	1	0	0	59	114.633	49.7	2	0	0	0	0	0	0	0	0	24.3824	1.7362	0	0	0	2	0	1.07	0.88	0.497
96	71	1	1	75	172	2	2	1	0	0	117	54.3117	68.8	3	0	0	0	0	0	0	0	0	25.3515	1.8563	0	0	0	4	0	1.95	0.94	1.315
97	72	1	1	55	167	2	3	0	0	0	65	70.6524	47.4	2	0	0	1	0	0	0	0	0	19.721	1.5698	0	0	0	3	0	3.28	0.83	1.282
98	63	2	1	59	166	1	3	1	0	0	60	92.9738	60.1	3	0	0	0	0	0	0	0	0	21.4109	1.6149	0	0	0	3	0	1.66	1.03	0.913
99	67	2	1	60	168	3	2	1	0	0	55	97.7868	53.1	3	0	0	0	0	0	0	0	0	21.2585	1.6399	0	0	0	3	0	1.74	0.99	0.937
100	72	1	1	80	172	2	2	1	1	0	51	130.978	59	3	0	1	0	0	0	0	0	0	27.0416	1.9203	0	0	0	3	1	1.78	1.83	0.625
101	72	1	1	60	159	1	2	1	0	0	135	37.1104	74.1	2	0	0	0	0	0	0	0	0	23.7332	1.585	0	0	0	3	0	3.08	1.79	1.583
102	76	1	2	60	160	1	2	1	0	0	93	43.0959	66.4	3	0	0	0	0	0	0	0	0	23.4375	1.5911	0	0	0	3	0	3.25	0.84	2.996
103	58	2	1	78	177	3	2	1	0	0	110	71.3978	47.9	3	0	0	1	0	0	0	0	0	24.8971	1.9252	0	0	0	3	0	1.43	0.84	1.194
104	69	2	1	80	175	3	3	1	0	0	71	98.2333	63.6	3	0	0	0	0	0	0	0	0	26.1224	1.9386	0	0	0	4	0	1.68	1.08	0.242
105	57	2	1	78	167	1	2	1	0	0	65	122.3	59.9	3	0	0	0	0	0	0	0	0	27.968	1.8642	0	0	0	4	0	1.02	3.97	0.329
106	54	2	1	74	169	2	2	1	0	0	55	142.081	57.1	3	0	0	0	0	0	0	0	0	25.9095	1.8252	0	0	0	3	0	0.76	0.52	0.342
107	65	2	1	80	168	2	3	1	1	0	48	153.49	70.1	3	0	0	0	0	0	0	0	0	28.3447	1.8959	0	0	0	3	0	1.5	0.3	0.818
108	67	2	1	69	175	2	2	1	0	0	65	95.1541	66.8	3	0	0	0	0	0	0	0	0	22.5306	1.7978	0	0	0	4	0	1.28	0.44	0.507
109	77	1	1	65	165	2	2	1	0	0	72	69.8378	64	3	0	0	0	0	0	0	0	0	23.8751	1.6856	0	0	0	4	0	2.34	1.14	1.667
110	55	2	1	73	163	1	1	0	1	0	75	101.59	59.8	3	0	0	0	0	0	0	0	0	27.4756	1.7758	0	0	0	4	0	0.95	0.62	0.402
111	59	2	1	70	166	2	2	1	1	0	84	82.8844	68.4	2	0	0	0	0	0	0	0	0	25.4028	1.7557	0	0	0	2	0	1.05	0.54	0.573
112	43	2	1	100	185	2	2	0	0	0	67	177.773	65.4	3	0	0	0	0	0	0	0	0	29.2184	2.2556	0	0	0	3	0	0.69	0.39	0.38
113	62	2	1	72	167	2	3	0	0	0	101	68.277	63.4	3	0	0	0	0	0	0	0	0	25.8166	1.7874	0	0	0	3	0	1.49	1.17	0.677
114	60	2	1	80	173	3	3	1	1	1	99	79.3805	53.4	3	0	0	0	0	0	0	0	0	26.7299	1.9264	0	0	0	3	0	1.88	0.91	1.022
115	67	2	1	66	167	1	2	1	0	0	77	76.8325	64	3	0	0	0	0	0	0	0	0	23.6652	1.7106	0	0	0	3	0	1.4	1.27	0.958
116	64	2	1	83	178	2	2	0	0	0	93	83.2871	62.3	3	0	0	0	0	0	0	0	0	26.1962	1.9953	0	0	0	3	0	1.06	1.03	0.592
117	55	2	2	62	161	2	1	1	0	0	74	74.3304	63.6	3	0	0	0	0	0	0	0	0	23.9188	1.6228	0	0	0	2	0	1.06	0.75	0.593
118	60	2	1	64	171	1	2	1	0	0	128	49.1167	60	3	0	0	0	0	0	0	0	0	21.8871	1.7094	0	0	0	3	0	1.45	0.83	1.047
119	56	2	1	90	175	2	2	0	0	0	132	70.3261	64	3	0	1	0	0	0	0	0	0	29.3878	2.0666	0	0	0	3	1	1.12	0.65	0.524
120	58	2	1	65	172	2	2	1	0	0	108	60.6	61.9	3	0	0	0	0	0	0	0	0	21.9713	1.7283	0	0	0	3	0	1.16	0.49	0.434
121	53	2	1	75	180	2	2	0	0	0	119	67.329	62	1	0	0	0	0	0	0	0	0	23.1481	1.9051	0	0	0	1	0	0.76	0.38	0.266
122	70	1	1	62	163	2	1	1	0	0	96	55.5121	64.5	3	0	0	0	0	0	0	0	0	23.3355	1.635	0	0	0	3	0	1.81	1.29	1.182
123	63	2	1	70	167	2	1	1	0	0	107	61.8549	65.6	1	0	0	0	0	0	0	0	0	25.0995	1.7618	0	0	0	3	0	0.95	0.6	0.333
124	75	1	1	80	170	2	2	1	1	0	108	59.1219	62.5	3	0	0	0	0	0	0	0	0	27.6817	1.9081	0	0	0	4	0	2.65	1.87	1.465
125	52	2	1	82	176	2	2	1	0	0	96	92.2984	60.9	3	0	0	0	0	0	0	0	0	26.4721	1.9703	0	0	0	4	0	0.69	0.37	0.192
126	66	2	2	71	158	2	2	1	1	0	66	83.0872	62.7	3	0	0	0	0	0	0	0	0	28.441	1.7197	0	0	0	4	0	1.74	0.78	0.606
127	69	2	1	81	171	2	1	1	0	0	114	61.9452	51.3	3	0	0	0	0	0	0	0	0	27.7008	1.927	0	0	0	3	0	1.53	0.69	1.573
128	66	2	2	47	151	2	2	1	0	0	88	41.251	60.7	3	0	0	0	0	0	0	0	0	20.6131	1.3698	0	0	0	3	0	2.56	2.65	2.692
129	75	1	1	80	177	2	2	0	1	0	111	57.524	65	1	0	0	0	2	0	0	0	0	25.5354	1.9508	0	0	1	1	0	1.43	1.53	1.21
130	75	1	1	64	175	2	1	1	0	0	141	36.2279	59	3	0	0	0	0	0	0	0	0	20.898	1.7338	0	0	0	3	0	2.96	1.48	2.881
131	55	2	1	88	170	2	2	1	0	0	134	68.5434	58	3	0	0	0	0	0	0	0	0	30.4498	2.0105	0	1	0	4	0	0.97	1.7	0.391
132	71	1	1	63	165	2	1	1	0	0	130	41.0596	62.5	3	0	0	0	0	0	0	0	0	23.1405	1.66	0	0	0	4	0	2.49	1.12	1.617
133	66	2	2	60	152	1	2	1	1	0	83	55.8332	60.2	3	0	0	0	0	0	0	0	0	25.9695	1.5423	0	0	0	3	0	2.37	1.38	2.395
134	59	2	1	65	172	2	1	0	0	0	153	42.2548	62.1	2	0	0	0	0	0	0	0	0	21.9713	1.7283	0	0	0	3	0	1.26	0.84	0.573
135	60	2	1	60	162	2	2	1	1	0	125	47.152	63.7	3	0	0	0	0	0	0	0	0	22.8624	1.6033	0	0	0	4	0	0.95	0.4	0.333
136	62	2	1	78	168	2	2	1	1	0	95	78.6384	53.4	3	0	0	1	0	0	0	0	0	27.6361	1.8703	0	0	0	3	0	1.58	0.52	0.347
137	55	2	1	70	170	2	2	1	0	0	78	93.668	62.4	3	0	0	0	0	0	0	0	0	24.2215	1.7801	0	0	0	3	0	0.85	0.48	0.362
138	75	1	1	67	170	3	2	1	0	0	103	51.9182	58	3	0	0	0	0	0	0	0	0	23.1834	1.7417	0	0	0	3	0	2.76	0.82	1.648
139	60	2	1	73	166	2	2	0	0	0	77	93.1303	61.9	3	0	0	0	0	0	0	0	0	26.4915	1.7941	0	0	0	3	0	0.95	0.44	0.369
140	65	2	1	77	175	1	1	0	0	0	79	89.7623	69.2	3	0	0	0	0	0	0	0	0	25.1429	1.9002	0	0	0	3	0	0.99	1.01	0.629
141	69	2	1	62	170	2	3	1	0	0	102	52.993	73.6	3	0	0	0	0	0	0	0	0	21.4533	1.6777	0	0	0	3	0	2.37	0.72	0.862
142	69	2	1	73	173	3	2	1	0	0	90	70.7144	58.8	3	0	0	0	0	0	0	0	0	24.3911	1.8368	0	0	0	4	0	1.44	0.92	1.078
143	66	2	1	70	171	2	3	1	0	0	70	90.8658	59.8	3	0	1	0	0	0	0	0	0	23.939	1.7862	0	0	0	4	1	1.57	1.23	1.099
144	64	2	1	65	166	1	1	0	0	0	77	78.778	69	2	0	0	0	0	0	0	0	0	23.5883	1.6917	0	0	0	2	0	1.02	0.52	0.899
145	65	2	1	69	170	2	2	1	0	0	107	59.3876	49.7	3	0	0	0	0	0	0	0	0	23.8754	1.7673	0	0	0	3	0	1.44	0.59	1.51
146	52	2	1	70	165	3	3	0	1	0	79	95.7464	57.1	3	0	0	0	0	0	0	0	0	25.7117	1.7496	0	0	0	3	0	1.35	0.72	0.676
147	77	1	1	85	170	2	2	1	0	0	96	68.4947	60.9	3	0	1	0	0	0	0	0	0	29.4118	1.9721	0	0	0	3	1	2.73	0.54	3.227
148	70	1	1	60	170	2	3	1	1	1	85	60.6735	40	3	0	0	0	0	0	0	0	0	20.7612	1.6521	0	0	0	4	0	3.7	1.55	1.314
149	66	2	1	75	167	2	2	1	0	0	88	77.4425	72	3	0	0	0	0	0	0	0	0	26.8923	1.8258	0	0	0	3	0	1.26	0.91	1.92
150	70	1	1	56	163	2	2	1	0	0	95	50.6677	56.6	2	0	2	0	0	0	0	0	0	21.0772	1.5582	0	0	1	3	1	1.95	9.75	1.177
151	71	1	1	67	160	2	2	0	0	0	94	60.39	60.4	3	0	0	0	0	0	0	0	0	26.1719	1.6807	0	0	0	4	0	1.74	0.56	1.177
152	63	2	1	72	170	2	2	1	0	0	80	85.0946	61.9	3	0	0	0	0	0	0	0	0	24.9135	1.8057	0	0	0	2	0	1.08	0.35	0.205
153	49	2	1	71	173	1	1	0	0	0	57	139.185	60.9	3	0	0	0	0	0	0	0	0	23.7228	1.8112	0	0	0	4	0	0.67	0.44	0.289
154	72	1	1	53	170	3	3	1	1	0	73	60.6221	41.2	3	0	0	0	0	0	0	0	0	18.3391	1.5625	0	0	0	3	0	4.63	3.02	2.461
155	72	1	1	64	165	2	2	0	0	0	38	140.629	63.4	2	0	0	0	0	0	0	0	0	23.5078	1.6728	0	0	0	2	0	1.59	1.18	0.798
156	70	1	1	67	167	2	2	1	0	0	81	71.0979	64.4	3	0	0	0	0	0	0	0	0	24.0238	1.7234	0	0	0	4	0	1.62	1.38	0.725
157	58	2	1	82	168	2	1	1	0	0	56	147.438	62.7	2	0	0	0	0	0	0	0	0	29.0533	1.9215	0	0	0	3	0	0.67	1.03	0.255
158	70	1	1	58	158	2	2	1	0	0	70	71.2192	69.6	3	0	0	1	0	0	0	0	0	23.2335	1.5533	0	0	0	3	0	2.08	1.62	1.778
159	63	2	1	52	158	2	2	1	0	0	71	69.2476	58.7	3	0	0	0	0	0	0	0	0	20.83	1.4765	0	0	0	3	0	1.74	0.75	0.819
160	70	1	1	61	170	2	3	1	0	0	90	58.2578	68.8	3	0	0	0	0	0	0	0	0	21.1073	1.6649	0	0	0	3	0	2.27	1.48	0.757
161	70	1	1	68	163	2	2	1	1	0	77	75.9076	61.9	3	0	0	0	0	0	0	0	0	25.5937	1.7118	0	0	0	3	0	2.01	0.97	1.173
162	67	2	1	70	170	1	1	1	0	0	60	104.578	62.3	3	0	0	0	0	0	0	0	0	24.2215	1.7801	0	0	0	4	0	1.03	0.67	0.457
163	83	1	2	50	160	2	2	1	1	0	107	27.8003	60.9	3	0	0	0	0	0	0	0	0	19.5312	1.4631	0	0	0	3	0	5.86	2.99	3.968
164	76	1	1	77	170	2	2	0	0	0	52	116.369	55.9	3	0	0	0	0	0	0	0	0	26.6436	1.8697	0	0	0	5	0	1.81	0.52	0.498
165	70	1	1	49	145	2	3	1	1	0	55	76.5773	41.9	3	0	0	0	0	0	0	0	0	23.3056	1.3588	0	0	0	3	0	2.24	0.55	1.743
166	68	2	1	81	171	2	1	1	0	0	61	117.397	69.7	3	0	0	0	0	0	0	0	0	27.7008	1.927	0	0	0	4	0	1.12	1.45	0.8
167	58	2	1	68	168	2	2	0	0	0	50	136.937	62.1	3	0	0	0	0	0	0	0	0	24.093	1.7423	0	0	0	4	0	0.94	0.37	0.439
168	66	2	1	82	169	3	2	1	0	0	71	104.944	64	3	0	0	0	0	0	0	0	0	28.7105	1.9276	0	0	0	4	0	1.28	1.32	0.463
169	63	2	1	81	161	1	1	1	0	0	64	119.664	67.8	3	0	0	0	0	0	0	0	0	31.2488	1.866	0	1	0	3	0	4.53	2.35	3.746
170	65	2	1	75	176	1	1	0	0	0	68	101.574	70.4	3	0	0	0	0	0	0	0	0	24.2123	1.8807	0	0	0	2	0	0.98	0.44	0.356
171	65	2	1	76	176	3	2	0	0	0	53	132.059	61.9	3	0	0	0	0	0	0	0	0	24.5351	1.8935	0	0	0	4	0	0.95	0.5	0.323
172	69	2	1	64	169	2	2	1	0	0	65	85.8408	61	3	0	0	0	0	0	0	0	0	22.4082	1.6972	0	0	0	4	0	1.55	0.89	0.758
173	69	2	1	73	182	2	2	1	0	0	61	104.333	72.2	3	0	0	0	0	0	0	0	0	22.0384	1.8917	0	0	0	4	0	1.28	0.57	0.539
174	51	2	1	73	167	2	2	0	0	0	66	120.875	62.4	3	0	0	0	0	0	0	0	0	26.1752	1.8002	0	0	0	4	0	0.75	0.44	0.45
175	64	2	1	69	170	1	2	1	0	0	83	77.5807	65.2	3	0	1	0	0	0	0	0	0	23.8754	1.7673	0	0	0	4	1	1.18	0.74	1.034
176	68	2	1	68	163	1	2	1	0	0	72	83.4983	66.9	3	0	0	0	0	0	0	0	0	25.5937	1.7118	0	0	0	4	0	1.48	0.98	0.814
177	65	2	1	62	166	2	2	1	0	0	98	58.2634	65.8	3	0	0	0	0	0	0	0	0	22.4996	1.6533	0	0	0	4	0	1.54	1.62	0.974
178	68	2	1	70	163	2	2	1	1	0	150	41.258	69.1	3	0	0	0	2	0	0	0	0	26.3465	1.7374	0	0	0	3	0	2.97	2.87	1.297
179	55	2	1	51	168	2	2	1	0	0	78	68.2438	67.5	3	0	0	0	0	0	0	0	0	18.0697	1.5247	0	0	0	4	0	1.21	0.97	0.943
180	57	2	2	60	152	1	2	1	1	0	84	61.8782	70	3	0	0	0	0	0	0	0	0	25.9695	1.5423	0	0	0	4	0	1.67	1.69	1.055
181	62	2	1	76	171	2	2	0	0	0	79	92.1404	65.9	3	0	0	0	0	0	0	0	0	25.9909	1.863	0	0	0	4	0	0.97	0.37	0.234
182	67	2	2	59	156	2	2	1	0	0	70.2	64.0362	68	3	0	0	0	0	0	0	0	0	24.2439	1.5539	0	0	0	2	0	1.95	0.83	1.681
183	79	1	2	62	150	3	2	1	0	0	70	56.3912	57	3	0	0	1	0	0	0	0	0	27.5556	1.5557	0	0	0	3	0	4.15	2.93	1.508
184	76	1	1	70	170	1	2	1	0	0	94	58.522	63.7	2	0	0	0	0	0	0	0	0	24.2215	1.7801	0	0	0	2	0	1.89	0.81	1.278
185	75	1	1	81	175	2	1	1	0	1	141.7	45.6244	67.4	3	0	0	0	0	0	0	0	0	26.449	1.9514	0	0	0	3	0	2.42	0.89	0.753
186	76	1	1	71	170	3	2	1	0	0	69.7	80.0524	50	2	0	0	0	0	0	0	0	0	24.5675	1.7929	0	0	0	2	0	2	0.43	1.054
187	75	1	1	64	169	2	2	0	0	0	100.6	50.7767	64	3	0	0	0	0	0	0	0	0	22.4082	1.6972	0	0	0	3	0	2.39	2	1.841
188	71	1	1	70	164	2	2	1	0	0	107.7	55.0681	49.1	3	0	0	0	0	0	0	0	0	26.0262	1.7435	0	0	0	3	0	2.05	1.09	1.535
189	76	1	2	80	160	3	2	1	0	0	89.3	59.842	61.9	3	0	0	0	0	0	0	0	0	31.25	1.8471	0	1	0	3	0	3.15	1.71	1.039
190	78	1	1	65	165	3	2	0	0	1	92.9	53.267	60	3	0	0	0	0	0	0	0	0	23.8751	1.6856	0	0	0	3	0	3.45	5.12	2.128
191	75	1	1	73	168	2	2	0	0	1	85.7	67.9868	63	1	0	0	0	0	0	0	0	0	25.8645	1.8063	0	0	0	1	0	1.48	1.35	1.262
192	65	2	2	51	156	1	2	1	0	0	58.9	67.7804	60.2	3	0	0	0	0	0	0	0	0	20.9566	1.4515	0	0	0	3	0	1.97	0.44	1.312
193	72	1	1	70	168	2	2	1	1	0	97.6	59.8861	59.9	3	0	0	0	0	0	0	0	0	24.8016	1.7679	0	0	0	4	0	2.27	2.3	0.584
194	63	2	1	76	165	3	2	0	0	0	81.5	88.1689	61.5	3	0	1	0	0	0	0	0	0	27.9155	1.8264	0	0	0	4	1	1.1	0.54	0.575
195	75	1	1	72	165	2	1	0	0	0	93.4	61.5273	63.3	3	0	0	0	0	0	0	0	0	26.4463	1.7752	0	0	0	5	0	1.92	1.05	0.849
196	71	1	1	75	173	2	1	1	1	0	118.4	53.6695	63.7	3	0	1	0	0	0	0	0	0	25.0593	1.8624	0	0	0	4	1	2.25	0.28	1.177
197	64	2	1	70	179	2	2	1	1	0	75	87.1002	69	3	0	0	0	0	0	0	0	0	21.847	1.835	0	0	0	3	0	1.28	1.33	0.885
198	64	2	1	68	163	1	2	0	0	0	79.8	79.5222	63	3	0	0	0	0	0	0	0	0	25.5937	1.7118	0	0	0	4	0	0.97	0.5	0.448
199	71	1	1	71	175	2	2	1	0	0	85.6	70.2753	62.7	3	0	0	0	0	0	0	0	0	23.1837	1.8234	0	0	0	4	0	1.35	0.29	0.331
200	56	2	1	70	170	2	2	0	0	0	86.6	83.3736	64.7	3	0	0	0	0	0	0	0	0	24.2215	1.7801	0	0	0	5	0	0.89	1.07	0.423
201	68	2	1	70	172	2	1	0	0	0	86.6	71.463	60.9	3	0	0	0	0	0	0	0	0	23.6614	1.7923	0	0	0	4	0	1.28	0.52	0.541
202	61	2	2	62	164	1	2	1	0	0	98	52.1652	66.3	3	0	0	0	0	0	0	0	0	23.0518	1.6411	0	0	0	4	0	1.18	0.27	0.352
203	59	2	1	65	177	2	1	0	0	0	65.6	98.5515	58.9	3	0	0	0	0	0	0	0	0	20.7476	1.7588	0	0	0	4	0	0.73	0.91	0.525
204	75	1	1	76	170	2	2	1	0	0	92	65.9338	64	3	0	0	0	0	0	0	0	0	26.2976	1.8569	0	0	0	2	0	0.92	2.3	0.646
205	68	2	2	51	167	2	2	1	0	0	66	58.0693	64.4	3	0	0	0	0	0	0	0	0	18.2868	1.5186	0	0	0	4	0	1.83	0.5	0.808
206	76	1	1	42	156	2	2	1	0	0	92.7	35.6056	64	1	0	0	0	0	0	0	0	0	17.2584	1.3363	0	0	0	3	0	0.73	1.8	2.02
207	64	2	1	82	175	2	2	1	0	0	90.2	84.8379	61.7	3	0	0	0	0	0	0	0	0	26.7755	1.9642	0	0	0	2	0	1.28	0.69	0.558
208	63	2	1	65	158	2	2	1	0	0	75.1	81.8339	59	2	0	0	0	0	0	0	0	0	26.0375	1.6429	0	0	0	3	0	1.18	0.34	0.357
209	67	2	1	67	171	2	2	1	0	0	72.6	82.7237	63	3	0	0	0	0	0	0	0	0	22.913	1.7478	0	0	0	5	0	1.34	0.48	0.882
210	66	2	1	78	176	2	3	1	0	0	92.7	76.4567	64.4	3	0	0	0	0	0	0	0	0	25.1808	1.9191	0	0	0	3	0	1.52	0.77	0.649
211	64	2	2	59	156	1	2	1	0	0	88.7	52.763	61.9	3	0	0	0	0	0	0	0	0	24.2439	1.5539	0	0	0	4	0	1.74	1.31	1.123
212	52	2	1	71	168	2	2	1	0	0	65.6	116.952	60.9	3	0	0	0	0	0	0	0	0	25.1559	1.7807	0	0	0	3	0	0.76	0.69	0.356
213	63	2	1	87	173	2	1	1	1	0	124.9	65.8592	66.9	3	0	0	0	0	0	0	0	0	29.0688	2.016	0	0	0	3	0	1.48	2.21	0.868
214	59	2	2	68	152	2	3	0	0	0	77.8	73.8928	71.1	3	0	0	0	0	0	0	0	0	29.4321	1.6447	0	0	0	4	0	1.43	1.45	0.817
215	52	2	1	75	165	2	1	1	0	0	127.9	63.364	57.1	3	0	0	0	0	0	0	0	0	27.5482	1.8136	0	0	0	4	0	1.01	1.8	0.427
216	59	2	1	79	175	2	1	1	0	0	71.8	109.435	64.7	3	0	0	0	0	0	0	0	0	25.7959	1.9258	0	0	0	4	0	0.76	0.38	0.374
217	73	1	1	61	163	2	2	0	0	0	70.2	71.4885	72.8	3	0	0	0	0	0	0	0	0	22.9591	1.6222	0	0	0	5	0	2.14	1.04	2.058
218	54	2	1	65	161	2	2	1	0	0	121.9	56.3089	63	3	0	0	0	0	0	0	0	0	25.0762	1.6612	0	0	0	2	0	1.29	0.92	0.641
219	72	1	1	60	169	1	2	1	0	0	93.6	53.5246	55.9	3	0	1	0	0	0	0	0	0	21.0077	1.646	0	0	0	4	1	2.09	0.32	1.271
220	63	2	1	76	165	2	2	1	1	0	53	135.581	54.9	2	0	1	0	0	0	0	0	0	27.9155	1.8264	0	0	0	2	1	1.11	0.34	0.9
221	45	2	1	72	170	2	3	0	0	0	67.4	124.614	62	3	0	0	0	0	0	0	0	0	24.9135	1.8057	0	0	0	4	0	0.83	0.25	0.667
222	61	2	1	80	172	1	2	0	0	0	76.5	101.444	58.9	3	0	0	0	0	0	0	0	0	27.0416	1.9203	0	0	0	4	0	0.94	0.47	0.322
223	72	1	1	85	162	2	2	1	0	0	106.6	66.5793	78.2	3	0	0	0	0	0	0	0	0	32.3884	1.9233	0	1	0	4	0	1.85	0.52	0.889
224	58	2	1	85	178	2	2	1	0	0	62.6	136.719	64	3	0	0	0	0	0	0	0	0	26.8274	2.0209	0	0	0	3	0	0.76	0.54	0.316
225	76	1	1	63	165	2	2	0	0	0	109.5	45.2142	63.7	3	0	0	0	0	0	0	0	0	23.1405	1.66	0	0	0	4	0	3	1.73	1.239
226	50	2	1	69	173	2	2	1	0	0	92.4	82.5256	58.4	2	0	0	0	0	0	0	0	0	23.0546	1.7856	0	0	0	3	0	0.69	0.71	0.312
227	65	2	2	61	153	2	2	1	1	0	193.4	24.6901	60.6	3	0	0	0	0	0	0	0	0	26.0584	1.5612	1	0	0	3	0	4.05	3.52	0.495
228	56	2	1	68	164	4	3	0	1	0	80.7	86.9128	38.9	3	0	0	0	0	0	0	0	0	25.2826	1.7179	0	0	0	4	0	1.7	1.46	1.077
229	66	2	2	57	148	2	2	1	0	0	60.7	72.528	62.7	3	0	0	0	0	0	0	0	0	26.0226	1.4795	0	0	0	4	0	2.04	1.35	1.089
230	70	1	2	50	147	2	2	0	0	0	52.7	69.3179	75.7	3	0	0	0	0	0	0	0	0	23.1385	1.3838	0	0	0	3	0	3	1.48	1.155
231	73	1	1	53	155	3	2	1	0	0	122.3	35.6528	29.8	3	0	0	0	0	0	0	0	0	22.0604	1.471	0	0	1	3	1	6.07	2.92	3.004
232	62	2	1	72	170	2	2	1	0	0	72.2	95.5122	65.2	3	0	0	0	0	0	0	0	0	24.9135	1.8057	0	0	0	4	0	1	0.52	0.476
233	76	1	1	70	167	3	2	1	0	0	96.7	56.888	59.7	3	0	0	1	0	1	0	0	0	25.0995	1.7618	0	0	0	3	0	3.02	3.2	2.29
234	74	1	2	47	157	2	3	1	0	0	46.8	69.1805	71.4	2	0	0	1	0	0	0	0	0	19.0677	1.4064	0	0	0	2	0	4.62	1.1	2.684
235	60	2	1	70	173	2	2	1	1	0	85.4	80.5191	54	3	0	0	0	0	0	0	0	0	23.3887	1.7984	0	0	0	4	0	1.16	0.55	0.357
236	71	1	1	73	170	2	2	1	0	0	85.1	72.6794	70.8	3	0	0	0	0	0	1	0	0	25.2595	1.8185	0	0	0	3	0	1.95	1.4	1.319
237	69	2	1	74	169	2	1	1	0	0	78.4	82.2892	75	3	0	0	0	0	0	0	0	0	25.9095	1.8252	0	0	0	3	0	1.28	0.71	0.615
238	52	2	1	72	165	2	2	0	1	0	58.4	133.221	59.9	3	0	0	0	0	0	0	0	0	26.4463	1.7752	0	0	0	4	0	0.98	5.57	2.295
239	61	2	2	62	146	1	2	0	0	0	59.4	86.0637	69	3	0	0	0	0	0	0	0	0	29.0861	1.5313	0	0	0	2	0	1.51	0.69	0.632
240	65	2	1	78	177	2	1	1	0	0	88.3	81.3512	69.2	3	0	0	0	0	0	0	0	0	24.8971	1.9252	0	0	0	3	0	1	0.35	0.577
241	72	1	1	79	176	1	1	0	0	0	98.4	67.0363	67.5	3	0	0	0	0	0	0	0	0	25.5036	1.9319	0	0	0	4	0	1.51	1.61	0.857
242	75	1	1	68	165	2	2	0	1	0	86.7	62.5997	63	2	0	0	0	0	0	0	0	0	24.977	1.724	0	0	0	2	0	2.27	0.69	1.18
243	72	1	1	77	173	2	2	1	0	0	89.3	71.9974	69.2	3	0	0	0	0	0	0	0	0	25.7276	1.888	0	0	0	4	0	1.58	0.59	1.246
244	67	2	1	70	173	2	3	0	0	0	83	75.5982	51.9	3	0	0	1	0	0	0	0	0	23.3887	1.7984	0	0	0	4	0	2.03	0.74	1.122
245	50	2	1	83	174	2	3	0	0	0	61.8	148.423	46.6	3	0	0	0	0	0	0	0	0	27.4145	1.9709	0	0	0	4	0	0.87	0.81	0.379
246	67	2	2	52	153	2	2	1	1	0	63.1	62.7892	66.8	3	0	0	0	0	0	0	0	0	22.2137	1.446	0	0	0	4	0	2.83	1.32	2.037
247	66	2	1	75	170	3	3	0	0	0	147.9	46.078	60	3	0	0	0	0	0	0	0	0	25.9516	1.8441	0	0	0	3	0	2.86	1.43	1.901
248	77	1	1	61	168	1	2	0	0	0	66	71.4982	62.1	3	0	0	0	0	0	0	0	0	21.6128	1.6527	0	0	0	3	0	2.41	1.42	1.937
249	77	1	1	76	170	2	2	1	1	0	71.8	81.8839	69	3	0	0	0	0	0	0	0	0	26.2976	1.8569	0	0	0	3	0	2.42	0.79	2.703
250	71	1	1	71	165	2	2	0	0	0	88	68.3587	71.1	3	0	0	0	0	0	0	0	0	26.079	1.7624	0	0	0	4	0	1.68	0.93	0.778
251	64	2	1	81	173	2	1	1	0	0	66	114.531	66.9	2	0	0	0	0	0	0	0	0	27.0641	1.9392	0	0	0	2	0	0.82	0.79	0.392
252	58	2	1	60	155	2	2	1	0	0	83.5	72.3515	66.9	2	0	0	0	0	0	0	0	0	24.974	1.5606	0	0	0	3	0	1.12	0.65	0.813
253	58	2	1	66	163	2	2	1	1	0	97	68.5102	64	3	0	0	0	0	0	0	0	0	24.841	1.6862	0	0	0	4	0	1.22	0.72	0.728
254	73	1	1	57	161	2	2	0	0	0	92.3	50.8062	61.9	3	0	0	0	0	0	0	0	0	21.9899	1.5588	0	0	0	3	0	2.54	0.74	1.749
255	62	2	1	63	168	1	2	0	1	0	73	82.6573	62.4	3	0	0	0	0	0	0	0	0	22.3214	1.6783	0	0	0	3	0	1.39	1.26	0.751
256	71	1	1	53	160	1	1	0	0	0	68.7	65.3638	66.9	3	0	0	0	0	0	0	0	0	20.7031	1.5015	0	0	0	3	0	2.21	0.69	0.836
257	50	2	1	70	173	1	1	0	1	0	59.9	129.146	65.9	3	0	0	0	0	0	0	0	0	23.3887	1.7984	0	0	0	4	0	0.7	0.92	0.608
258	64	2	1	74	167	1	3	1	1	0	68.7	100.521	70.8	3	0	0	0	0	0	0	0	0	26.5338	1.813	0	0	0	3	0	1.74	0.75	1.142
259	70	1	1	60	166	1	1	0	0	0	89.8	57.4304	61.9	3	0	0	0	0	0	0	0	0	21.7738	1.6277	0	0	0	3	0	1.74	1.35	1.434
260	65	2	1	88	172	1	2	1	0	0	80.6	100.549	69.4	3	0	1	0	0	0	0	0	0	29.7458	2.0227	0	0	0	4	1	0.95	0.37	0.336
261	61	2	1	60	163	2	3	1	0	0	55.7	104.494	64.7	2	0	0	0	0	0	0	0	0	22.5827	1.6094	0	0	0	3	0	1.34	0.81	1.018
262	80	1	1	75	172	2	2	0	0	0	75.6	73.0903	62	3	0	0	0	0	0	0	0	0	25.3515	1.8563	0	0	0	4	0	2.28	0.56	0.639
263	68	2	1	76	167	2	1	1	0	1	58.9	114.077	64.7	3	0	0	0	0	0	0	0	0	27.2509	1.8386	0	0	0	3	0	1.19	1.2	0.982
264	74	1	1	70	176	2	2	1	0	0	65.2	87.0088	62.4	2	0	0	0	0	0	0	0	0	22.5981	1.8167	0	0	0	3	0	1.51	1.84	1.114
265	56	2	1	71	165	1	1	1	0	0	78.7	93.0533	65.8	3	0	0	0	0	0	0	0	0	26.079	1.7624	0	0	0	5	0	0.82	0.73	0.599
266	56	2	2	53	148	2	2	0	0	0	76.4	60.8204	66.9	2	0	0	0	0	0	0	0	0	24.1965	1.4283	0	0	0	2	0	1.35	0.82	0.499
267	67	2	2	65	161	3	3	0	0	0	41.1	120.499	62.7	1	0	0	0	0	0	0	0	0	25.0762	1.6612	0	0	0	3	0	1.93	0.55	0.806
268	59	2	1	70	165	2	2	1	0	0	72.6	95.8993	69.4	3	0	0	0	0	0	0	0	0	25.7117	1.7496	0	0	0	4	0	0.85	0.67	0.454
269	73	1	1	81	174	2	2	1	0	0	94.4	70.5922	53.4	3	0	0	0	0	0	0	0	0	26.7539	1.9453	0	0	0	5	0	1.29	1.18	0.46
270	44	2	1	82	174	1	2	0	1	0	73.4	131.692	71	3	0	0	0	0	0	0	0	0	27.0842	1.9581	0	0	0	4	0	0.72	0.4	0.56
271	61	2	1	60	180	2	2	0	0	0	90.1	64.5985	65.4	3	0	0	0	0	0	0	0	0	18.5185	1.7131	0	0	0	4	0	1.08	0.51	0.43
272	65	2	2	57	147	2	1	0	0	1	61.2	72.9076	66.4	2	0	0	0	0	0	0	0	0	26.3779	1.4734	0	0	0	3	0	1.6	1.07	1.242
273	56	2	1	85	170	2	2	1	0	0	97	90.3848	65.4	3	0	0	0	0	0	0	0	0	29.4118	1.9721	0	0	0	4	0	0.86	0.16	0.336
274	67	2	1	70	164	2	2	0	0	0	85.4	73.4737	69.6	3	0	0	0	0	0	0	0	0	26.0262	1.7435	0	0	0	4	0	1.26	1	0.821
275	70	1	1	53	163	2	2	1	0	0	64.2	70.959	66.4	3	0	0	0	0	0	0	0	0	19.9481	1.5198	0	0	0	3	0	1.91	0.38	1.15
276	57	2	1	81	171	2	2	1	0	0	77.4	106.657	52.5	3	0	1	0	0	0	0	0	0	27.7008	1.927	0	0	0	4	1	0.79	0.47	0.467
277	72	1	2	50	155	4	2	1	1	0	150.1	23.6421	63.1	3	0	0	0	0	0	0	0	0	20.8117	1.4326	0	0	0	3	0	6.06	2.18	3.915
278	71	1	2	57	151	2	2	1	0	0	60.4	67.9634	63.6	2	0	0	0	0	0	0	0	0	24.9989	1.4978	0	0	0	3	0	2.25	0.36	0.777
279	55	2	2	65	155	2	2	1	0	0	55.7	103.53	65.9	2	0	0	0	0	0	0	0	0	27.0552	1.6246	0	0	0	2	0	0.99	0.59	0.496
280	72	1	1	65	178	2	2	1	0	0	67.6	80.2869	65.9	3	0	0	0	0	0	0	0	0	20.5151	1.7649	0	0	0	3	0	1.65	0.45	0.874
281	58	2	1	68	168	2	2	1	0	0	64.2	106.649	70.3	3	0	0	0	0	0	0	0	0	24.093	1.7423	0	0	0	5	0	0.82	0.46	0.475
282	53	2	1	80	172	2	2	0	0	0	66.8	127.939	62.4	2	0	0	0	0	0	0	0	0	27.0416	1.9203	0	0	0	2	0	0.65	0.78	0.327
283	45	2	2	74	164	1	2	1	1	0	42.4	173.052	64.7	2	0	0	0	0	0	0	0	0	27.5134	1.7947	0	0	0	2	0	0.95	0.56	0.439
284	69	2	1	73	168	2	2	1	0	0	69.4	91.7045	64.7	3	0	0	0	0	0	0	0	0	25.8645	1.8063	0	0	0	3	0	1.39	0.75	0.53
285	64	2	1	82	175	2	2	1	0	0	134.2	57.0222	66	3	0	0	0	0	0	0	0	0	26.7755	1.9642	0	0	0	3	0	1.52	0.81	0.558
286	66	2	2	75	164	1	2	1	0	0	62	93.4306	66.4	3	0	0	0	0	0	0	0	0	27.8852	1.8075	0	0	0	4	0	1.33	0.66	0.333
287	56	2	1	85	173	2	1	1	0	0	82.3	106.529	62.4	3	0	0	0	0	0	0	0	0	28.4005	1.9904	0	0	0	3	0	0.7	0.9	0.52
288	67	2	1	68	163	1	2	1	0	0	82	74.3339	67.9	3	0	0	0	0	0	0	0	0	25.5937	1.7118	0	0	0	2	0	3.78	1.23	4.004
289	75	1	1	60	145	2	2	1	0	0	83.6	57.2832	62.1	3	0	0	0	0	0	0	0	0	28.5375	1.4996	0	0	0	5	0	3.27	0.17	1.194
290	60	2	1	80	171	3	2	1	0	0	95.1	82.6358	51.3	3	0	1	0	0	0	0	0	0	27.3588	1.9142	0	0	0	3	1	1.08	0.62	0.908
291	48	2	1	77	170	1	1	1	0	0	73.3	118.671	57.9	1	0	0	0	0	0	0	0	0	26.6436	1.8697	0	0	0	2	0	0.55	0.34	0.216
292	61	2	1	83	175	2	2	1	0	0	74.9	107.496	69.7	3	0	1	0	0	0	0	0	0	27.102	1.977	0	0	0	3	1	0.89	0.69	0.466
293	56	2	1	61	169	2	2	1	0	0	101.2	62.1724	65.2	2	0	0	0	0	0	0	0	0	21.3578	1.6588	0	0	1	2	0	0.98	1.06	0.979
294	63	2	1	58	155	2	2	0	0	0	69.3	79.1324	47.5	2	0	0	0	0	0	0	0	0	24.1415	1.535	0	0	0	2	0	1.39	0.97	0.789
295	50	2	1	70	174	2	2	1	0	0	71.5	108.194	63.4	2	0	1	0	0	0	0	0	0	23.1206	1.8045	0	0	0	3	1	0.66	0.68	0.317
296	66	2	1	58	150	2	2	1	0	0	215	24.5126	59.9	3	0	0	0	0	0	0	0	0	25.7778	1.5045	1	0	0	3	0	3.8	1	2.313
297	51	2	2	74	164	2	2	0	0	0	49.4	139.15	62.1	2	0	0	0	0	0	0	0	0	27.5134	1.7947	0	0	0	3	0	0.79	0.49	0.619
298	62	2	1	75	168	2	2	1	0	0	74	97.0718	70	3	0	0	0	0	0	0	0	0	26.5731	1.8319	0	0	0	4	0	0.98	0.56	0.5
299	60	2	2	68	150	3	3	1	1	0	66.9	84.8713	53.1	3	0	0	1	0	0	0	0	0	30.2222	1.6325	0	1	0	3	0	3.02	1.49	2.131
300	76	1	1	78	173	2	2	1	1	0	122.1	50.2028	63.7	3	0	0	0	0	0	0	0	0	26.0617	1.9008	0	0	0	3	0	3.25	1.17	2.851
301	60	2	1	77	157	1	1	1	1	0	60.4	125.231	60.9	2	0	0	0	0	0	0	0	0	31.2386	1.7904	0	1	0	3	0	0.95	0.43	0.371
302	75	1	1	73	169	2	2	1	0	0	67.9	85.8095	62.7	3	0	0	0	0	0	0	0	0	25.5593	1.8124	0	0	0	4	0	1.85	0.42	0.871
303	68	2	1	71	169	2	2	1	0	0	61.6	101.901	60.2	3	0	0	0	0	0	0	0	0	24.8591	1.7868	0	0	0	4	0	1.33	0.84	1.294
304	67	2	2	54	157	1	2	1	0	0	52.7	78.0717	58	3	0	0	0	0	0	0	0	0	21.9076	1.496	0	0	0	4	0	2.01	0.4	0.853
305	76	1	1	72	172	1	3	1	1	0	78	72.5415	71.9	2	0	0	1	0	0	0	0	0	24.3375	1.8179	0	0	0	3	0	3.44	1.23	2.354
306	68	2	1	78	172	2	2	1	0	0	65.9	104.643	71.2	3	0	0	0	0	0	0	0	0	26.3656	1.8947	0	0	0	4	0	1.1	0.98	0.613
307	65	2	2	60	156	3	2	0	1	0	48.7	96.4431	51.3	3	0	0	1	0	0	0	0	0	24.6548	1.5667	0	0	0	4	0	2.54	1.73	2.021
308	65	2	1	78	174	2	3	1	0	0	56.9	126.245	58.9	3	0	0	0	0	0	0	0	0	25.763	1.9069	0	0	0	5	0	0.88	1.08	0.302
309	67	2	1	65	165	2	2	1	1	0	89.8	64.8827	44.6	3	0	0	0	0	0	0	0	0	23.8751	1.6856	0	0	0	3	0	1.98	0.57	1.199
310	79	1	2	56	150	2	2	1	0	0	72.7	49.0423	60.1	2	0	0	0	0	0	0	0	0	24.8889	1.4789	0	0	0	3	0	3.4	0.89	1.666
311	66	2	1	90	173	2	1	1	0	0	107	76.4292	65.4	3	0	0	0	0	0	0	0	0	30.0712	2.0544	0	1	0	4	0	1.22	0.27	0.759
312	73	1	1	68	162	3	2	1	0	0	72.7	76.9517	61.5	3	0	0	0	0	0	0	0	0	25.9107	1.7057	0	0	0	4	0	1.95	1.13	1.201
313	61	2	1	68	173	2	2	1	0	0	50.1	131.664	60.9	3	0	0	0	0	0	0	0	0	22.7204	1.7728	0	0	0	4	0	0.85	0.3	0.29
314	70	1	1	94	172	2	2	1	0	0	104.3	77.4659	69.2	3	0	0	0	0	0	0	0	0	31.7739	2.0995	0	1	0	3	0	1.54	1.04	0.521
315	75	1	1	71	173	2	2	1	0	0	69.2	81.8907	67.4	3	0	0	0	0	0	0	0	0	23.7228	1.8112	0	0	0	4	0	1.83	0.62	1.163
316	52	2	1	89	170	2	3	0	0	0	50.6	190.06	46.8	3	0	0	0	0	0	0	0	0	30.7958	2.0233	0	1	0	5	0	0.76	0.73	0.327
317	53	2	1	65	160	1	2	1	1	1	74.9	92.7085	68	3	0	0	0	0	0	0	0	0	25.3906	1.6551	0	0	0	4	0	1.17	0.48	0.379
318	60	2	1	63	158	2	2	1	0	0	59.9	103.317	60.9	3	0	0	0	0	0	0	0	0	25.2363	1.6173	0	0	0	5	0	1.16	0.89	0.901
319	69	2	2	68	153	1	2	1	0	0	58.8	85.6994	65.9	2	0	0	0	0	0	0	0	0	29.0487	1.6508	0	0	0	3	0	1.72	1.09	0.834
320	75	1	1	68	163	1	2	1	0	0	160	33.9212	65.6	3	0	0	0	0	0	0	0	0	25.5937	1.7118	0	0	0	4	0	3.5	1.32	1.698
321	65	2	1	85	173	3	3	1	1	0	78	100.359	53.1	3	0	0	0	0	0	0	0	0	28.4005	1.9904	0	0	0	4	0	1.91	2.45	1.143
322	56	2	1	71	158	2	2	1	0	0	76.4	95.8546	57.9	3	0	0	0	0	0	0	0	0	28.441	1.7197	0	0	0	4	0	0.95	0.48	0.544
323	58	2	1	59	168	2	2	0	0	0	71.2	83.4362	73.8	3	0	0	0	0	0	0	0	0	20.9042	1.6271	0	0	0	3	0	1.08	0.42	0.366
324	67	2	1	77	175	2	2	0	0	1	120	57.5177	35.1	3	0	0	0	0	0	0	0	0	25.1429	1.9002	0	0	0	3	0	2.21	0.91	0.451
325	68	2	1	70	178	2	2	1	0	0	94.9	65.2129	65.4	3	0	0	0	0	0	0	0	0	22.0932	1.8289	0	0	0	4	0	1.39	0.65	0.506
326	60	2	1	60	163	2	2	1	0	0	96	61.3958	65.9	3	0	0	0	0	0	0	0	0	22.5827	1.6094	0	0	0	4	0	1.15	0.61	0.27
327	72	1	1	87	172	2	2	1	0	0	89.3	81.3478	65	3	0	0	0	0	0	0	0	0	29.4078	2.0099	0	0	0	4	0	1.49	0.74	0.641
328	56	2	1	75	170	1	2	0	0	0	47.7	162.178	63	2	0	0	0	0	0	0	0	0	25.9516	1.8441	0	0	0	2	0	0.69	0.59	0.351
329	59	2	1	71	165	2	2	1	1	0	86.7	81.4504	55.3	3	0	0	0	0	0	0	0	0	26.079	1.7624	0	0	0	5	0	0.95	0.35	0.243
330	75	1	2	55	150	3	2	0	0	0	54.8	68.09	64.7	2	0	0	0	0	0	0	0	0	24.4444	1.4661	0	0	0	3	0	3.34	0.95	0.35
331	70	1	1	80	176	2	2	0	0	0	98.1	70.0951	61	3	0	0	0	0	0	0	0	0	25.8264	1.9447	0	0	0	4	0	1.32	0.94	0.431
332	70	1	1	63	173	1	2	1	1	0	67.5	80.2239	64.6	2	0	0	0	0	0	0	0	0	21.0498	1.7088	0	0	0	3	0	1.74	0.75	1.039
333	57	2	1	56	152	2	2	1	0	0	70.2	81.3014	64	3	0	0	0	0	0	0	0	0	24.2382	1.4911	0	0	0	2	0	1.36	1.03	1.033
334	68	2	2	65	160	2	2	1	1	0	37.3	130.956	69.9	3	0	0	0	0	0	0	0	0	25.3906	1.6551	0	0	0	3	0	2.18	1.84	1.208
335	63	2	1	77	173	1	2	1	1	0	90.2	80.7131	64.4	3	0	0	0	0	0	0	0	0	25.7276	1.888	0	0	0	4	0	1.36	0.59	0.965
336	77	1	1	62	170	2	2	1	0	0	108	44.4097	69.4	2	0	0	0	0	0	0	0	0	21.4533	1.6777	0	0	0	3	0	3.6	1.2	2.301
337	53	2	2	63	160	1	2	1	1	0	71.3	80.2339	45.1	3	0	0	0	0	0	0	0	0	24.6094	1.6295	0	0	0	4	0	1.41	1.01	0.399
338	71	1	1	59	155	2	3	0	0	0	106.6	46.8935	72.8	3	0	0	0	0	0	0	0	0	24.5578	1.5478	0	0	0	3	0	3.64	1.33	1.515
339	69	2	1	68	162	2	3	1	0	0	140.9	42.0751	46.8	3	0	0	0	0	0	0	0	0	25.9107	1.7057	0	0	0	3	0	4.15	1.06	2.036
340	72	1	1	66	163	2	2	1	0	0	74.2	74.2708	61.7	3	0	0	0	0	0	0	0	0	24.841	1.6862	0	0	0	4	0	1.66	0.87	1.082
341	56	2	1	90	163	2	1	1	0	1	51.1	181.664	55.4	3	0	0	0	0	0	0	0	0	33.8741	1.9934	0	1	0	4	0	0.69	0.5	0.364
342	70	1	1	80	170	3	2	1	1	0	76	90.4781	52.8	3	0	0	0	0	0	0	0	0	27.6817	1.9081	0	0	0	4	0	2.41	1.46	1.866
343	68	2	1	60	160	2	2	1	0	0	105.1	50.4719	65.8	3	0	0	0	0	0	0	0	0	23.4375	1.5911	0	0	0	4	0	2.12	1.52	2.28
344	68	2	1	60	167	2	3	1	1	0	53.7	98.7821	65.9	3	0	0	0	0	0	0	0	0	21.5139	1.6338	0	0	0	3	0	2.48	0.31	0.837
345	56	2	1	85	172	2	2	1	1	0	54.2	161.759	67.9	3	0	0	0	0	0	0	0	0	28.7317	1.9843	0	0	0	4	0	0.93	0.8	0.483
346	56	2	1	70	172	1	2	1	0	0	69.5	103.887	60.9	3	0	0	0	0	0	0	0	0	23.6614	1.7923	0	0	0	4	0	0.74	0.71	0.464
347	69	2	2	56	156	2	1	1	1	0	70.3	59.0308	67.5	3	0	0	0	0	0	0	0	0	23.0112	1.5155	0	0	0	4	0	2.54	1.15	1.383
348	65	2	1	62	169	2	2	1	0	0	59	96.7765	68	2	0	0	0	0	0	0	0	0	21.7079	1.6716	0	0	0	3	0	1.18	0.25	0.425
349	66	2	1	75	171	2	2	0	1	0	54.6	124.816	68.5	3	0	0	0	0	0	0	0	0	25.6489	1.8502	0	0	0	5	0	1.09	0.96	1.042
350	75	1	2	74	162	2	2	1	1	0	59.7	84.0928	61.9	3	0	0	0	0	0	0	0	0	28.1969	1.7825	0	0	0	3	0	3	1.57	1.255
351	75	1	2	52	150	2	2	1	1	0	65.4	53.942	67.5	3	0	0	0	0	0	0	0	0	23.1111	1.4277	0	0	0	4	0	4.73	3.09	3.576
352	56	2	1	68	172	2	2	1	0	0	88.5	79.2527	61	3	0	0	0	0	0	0	0	0	22.9854	1.7667	0	0	0	4	0	0.92	0.4	0.251
353	65	2	2	61	155	2	2	1	0	0	70.4	67.8276	56.9	3	0	0	0	0	0	0	0	0	25.3902	1.5734	0	0	0	3	0	1.74	1.16	0.953
354	61	2	1	66	165	2	2	0	1	0	66.3	96.5665	69.4	3	0	0	0	0	0	0	0	0	24.2424	1.6984	0	0	0	4	0	1.18	0.27	0.371
355	60	2	1	69	170	1	2	1	0	0	81.5	83.1669	62.4	1	0	0	0	0	0	0	0	0	23.8754	1.7673	0	0	0	3	0	0.68	0.4	0.191
356	67	2	1	64	160	2	2	0	1	0	61.7	92.9794	40.9	3	0	0	0	0	0	0	0	0	25	1.6423	0	0	0	3	0	2.15	0.85	0.834
357	71	1	1	69	165	1	2	1	0	0	98.9	59.1113	58.9	3	0	0	0	1	0	0	0	0	25.3444	1.7368	0	0	0	4	1	1.67	0.67	1.686
358	65	2	1	68	162	2	2	1	1	0	75.4	83.0554	45.2	3	0	0	1	0	0	0	0	0	25.9107	1.7057	0	0	0	4	0	2.37	1.99	1.199
359	71	1	2	61	143	3	2	1	1	0	77.2	56.9049	66.3	3	0	0	0	0	0	0	0	0	29.8303	1.5002	0	0	0	4	0	3.85	1.56	2.528
360	47	2	1	67	170	2	2	1	0	0	73	104.81	70	3	0	0	0	0	0	0	0	0	23.1834	1.7417	0	0	0	2	0	0.77	0.59	0.471
361	67	2	1	75	171	2	2	1	0	0	56.2	119.624	64.7	3	0	0	0	0	0	0	0	0	25.6489	1.8502	0	0	0	4	0	0.95	0.41	0.604
362	61	2	2	60	161	2	3	1	0	0	65.5	75.5309	64	3	0	0	0	0	0	0	0	0	23.1473	1.5972	0	0	0	4	0	1.77	0.41	0.881
363	75	1	1	85	176	1	2	1	0	0	81.6	83.1402	67.5	3	0	0	0	0	0	0	0	0	27.4406	2.0087	0	0	0	4	0	1.71	0.82	0.92
364	71	1	1	75	163	2	3	1	1	0	104.8	60.6342	65.4	3	0	0	0	2	0	0	0	0	28.2284	1.8014	0	0	0	3	0	3.14	0.75	1.823
365	70	1	1	68	159	3	2	0	0	0	94.9	61.5899	54.4	2	0	0	0	0	0	0	0	0	26.8977	1.6874	0	0	0	2	0	1.9	0.86	0.735
366	62	2	1	71	168	2	2	1	1	0	70.7	96.1839	67.9	3	0	0	0	0	0	0	0	0	25.1559	1.7807	0	0	0	3	0	1.28	0.44	0.713
367	54	2	1	73	175	2	2	0	0	0	77.6	99.341	65.4	2	0	0	0	0	0	0	0	0	23.8367	1.849	0	0	0	2	0	0.69	0.55	0.332
368	79	1	2	63	145	3	2	1	0	0	70.4	56.9752	69	3	0	0	0	0	0	0	0	0	29.9643	1.538	0	0	0	3	0	4.42	2.47	1.353
369	66	2	2	66	159	2	2	1	0	0	57.9	88.041	59.8	3	0	1	1	0	0	0	0	0	26.1066	1.6618	0	0	0	4	1	1.98	1.06	0.768
370	72	1	1	78	176	2	2	0	1	0	69.7	93.4415	56.8	3	0	0	0	0	0	0	0	0	25.1808	1.9191	0	0	0	3	0	1.81	0.78	0.425
371	72	1	1	82	172	3	3	1	0	0	85.7	79.8934	63	3	0	0	1	0	0	0	0	0	27.7177	1.9459	0	0	0	4	0	2.84	2.55	1.267
372	70	1	1	78	172	1	1	1	0	0	120.4	55.6846	61.7	3	0	0	0	0	0	0	0	0	26.3656	1.8947	0	0	0	3	0	1.74	0.78	0.919
373	68	2	1	70	165	3	1	1	1	0	77.9	79.4442	46.6	3	0	0	0	0	0	0	0	0	25.7117	1.7496	0	0	0	3	0	1.95	1	2.042
374	62	2	1	69	163	2	1	1	0	0	70.4	93.8728	52.7	3	0	0	0	0	0	0	0	0	25.9701	1.7246	0	0	0	4	0	1.01	0.68	0.782
375	68	2	1	70	166	2	1	1	0	0	151.4	40.8765	62.7	3	0	0	0	0	0	0	0	0	25.4028	1.7557	0	0	0	3	0	2.06	1.46	1.667
376	63	2	1	97	178	2	2	0	0	0	73.6	124.61	59	3	0	0	0	0	0	0	0	0	30.6148	2.1745	0	1	0	4	0	0.95	0.45	0.38
377	62	2	1	77	174	1	3	0	0	0	52.3	141.011	59	3	0	0	0	0	0	0	0	0	25.4327	1.8941	0	0	0	3	0	1.18	0.34	0.425
378	67	2	2	56	150	3	3	0	1	0	57.1	74.7244	60	3	0	0	0	0	0	0	0	0	24.8889	1.4789	0	0	0	4	0	4.03	0.85	1.776
379	70	1	1	65	175	2	2	1	1	0	55	101.582	68.4	3	0	0	0	0	0	0	0	0	21.2245	1.7466	0	0	0	3	0	1.81	0.9	1.723
380	59	2	2	70	160	2	3	1	1	0	64	92.4679	61.9	3	0	0	0	0	0	0	0	0	27.3438	1.7191	0	0	0	3	0	1.72	0.87	0.804
381	60	2	1	105	175	1	2	1	0	0	78.8	130.895	67.4	3	0	0	0	0	0	0	0	0	34.2857	2.2586	0	1	0	4	0	0.68	0.47	0.679
382	72	1	1	60	160	2	3	0	0	0	80.3	62.3898	59.7	3	0	0	1	0	0	0	0	0	23.4375	1.5911	0	0	0	2	0	3.5	0.97	3.132
383	75	1	2	53	140	2	2	1	0	0	70.6	50.9298	66.4	3	0	0	0	0	0	0	0	0	27.0408	1.3795	0	0	0	4	0	4.06	2.23	1.087
384	66	2	1	74	168	1	2	1	0	0	65.4	102.815	72.2	1	0	0	0	0	0	0	0	0	26.2188	1.8191	0	0	0	3	0	2	0.87	2.4
385	72	1	1	60	166	2	2	1	0	0	92.8	53.986	61.2	3	0	1	0	0	0	0	0	0	21.7738	1.6277	0	0	0	3	1	2.15	0.74	1.221
386	66	2	1	50	158	3	3	1	1	0	93.5	48.5914	42.5	3	0	0	0	0	0	0	0	0	20.0288	1.4509	0	0	0	4	0	4.7	0.82	2.64
387	69	2	1	68	175	3	2	0	0	0	85.7	69.176	69.2	2	0	0	0	0	0	0	0	0	22.2041	1.785	0	0	0	3	0	1.47	0.86	0.836
388	72	1	1	75	175	1	2	1	1	0	80.8	77.5046	62.4	3	0	0	0	0	0	0	0	0	24.4898	1.8746	0	0	0	3	0	1.88	0.53	1.01
389	52	2	1	72	160	2	2	1	0	0	68.1	114.245	69	3	0	0	0	0	0	0	0	0	28.125	1.7447	0	0	0	4	0	0.67	0.59	0.312
390	64	2	1	65	160	2	2	1	0	0	79.6	76.2049	61.7	3	0	0	0	0	0	0	0	0	25.3906	1.6551	0	0	0	4	0	1.21	0.57	0.623
391	58	2	1	65	160	3	2	1	0	0	72.6	90.1487	51.3	3	0	0	0	0	0	0	0	0	25.3906	1.6551	0	0	0	4	0	1.24	0.69	1.002
392	57	2	1	84	160	1	1	1	0	0	106.6	80.3099	65.5	3	0	0	0	0	0	0	0	0	32.8125	1.8983	0	1	0	3	0	0.95	0.24	0.344
393	64	2	1	82	175	2	2	1	1	0	93.4	81.9312	65.4	3	0	0	0	0	0	0	0	0	26.7755	1.9642	0	0	0	4	0	1.31	1.19	0.536
394	68	2	2	48	150	1	2	1	0	0	72.4	49.8222	65.2	3	0	0	0	0	0	0	0	0	21.3333	1.3765	0	0	0	3	0	2.76	1.53	1.186
395	63	2	1	67	172	3	2	0	0	0	74	85.6057	60.7	3	0	0	0	0	0	0	0	0	22.6474	1.7539	0	0	0	4	0	1.28	0.62	0.675
396	69	2	2	52	150	1	1	1	0	0	83.2	46.3155	64.4	3	0	1	0	0	0	0	0	0	23.1111	1.4277	0	0	0	4	1	2.16	0.62	1.322
397	67	2	1	58	165	2	2	1	0	0	84.3	61.6726	65	3	0	0	0	0	0	0	0	0	21.3039	1.596	0	0	0	4	0	1.3	1.05	0.869
398	66	2	1	104	178	1	2	1	1	0	50.1	188.624	61	3	0	0	0	0	0	0	0	0	32.8241	2.2641	0	1	0	3	0	1.28	2.22	0.575
399	75	1	1	62	153	2	2	1	0	0	77.8	63.6055	68	3	0	0	0	0	0	0	0	0	26.4855	1.574	0	0	0	4	0	2.68	0.63	0.942
400	66	2	1	66	176	2	2	1	0	0	89.2	67.2326	64.4	3	0	0	0	0	0	0	0	0	21.3068	1.7655	0	0	0	4	0	1.15	0.64	0.903
401	78	1	1	62	166	3	3	1	0	0	93.4	50.5365	66.4	3	0	0	0	0	0	0	0	0	22.4996	1.6533	0	0	0	3	0	4.19	1.03	0.724
402	64	2	1	68	173	2	2	1	0	0	86.8	73.1091	62.4	3	0	0	0	0	0	0	0	0	22.7204	1.7728	0	0	0	4	0	1.18	0.31	0.471
403	72	1	1	73	165	2	2	1	0	0	72.1	84.5406	65.9	3	0	0	0	0	0	0	0	0	26.8136	1.788	0	0	0	4	0	1.47	0.73	0.571
404	68	2	1	65	150	3	2	0	1	0	68	84.5096	66.9	3	0	0	0	0	0	0	0	0	28.8889	1.5941	0	0	0	4	0	2.27	2.8	0.715
405	63	2	1	70	176	1	2	1	1	0	77.3	85.6206	63	3	0	0	0	0	0	0	0	0	22.5981	1.8167	0	0	0	4	0	1.28	0.58	0.469
406	68	2	1	70	168	2	2	1	1	0	88.2	70.1667	66.9	3	0	0	0	0	0	0	0	0	24.8016	1.7679	0	0	0	3	0	1.77	0.68	0.763
407	68	2	2	65	150	2	1	1	0	0	39.9	122.422	63.2	3	0	0	0	0	0	0	0	0	28.8889	1.5941	0	0	0	4	0	1.76	1.26	1.299
408	58	2	1	55	158	2	3	0	1	0	82.5	67.1261	64.4	3	0	0	0	0	0	0	0	0	22.0317	1.5149	0	0	0	3	0	2.11	0.65	1.235
409	63	2	1	70	168	1	2	1	0	0	72.6	91.1635	66.4	3	0	0	0	0	0	0	0	0	24.8016	1.7679	0	0	0	2	0	1.1	0.58	0.601
410	76	1	1	66	168	2	2	1	0	1	104.2	49.7766	68	3	0	0	0	0	0	0	0	0	23.3844	1.7167	0	0	0	3	0	2.95	1.19	0.835
411	69	2	2	57	160	2	2	1	0	0	63.3	66.7294	65.8	3	0	0	0	0	0	0	0	0	22.2656	1.5527	0	0	0	4	0	2.1	1.35	0.762
412	73	1	1	69	172	1	2	1	0	0	76.1	74.5947	61.5	3	0	0	0	0	0	0	0	0	23.3234	1.7795	0	0	0	4	0	1.75	0.6	1.253
413	71	1	1	69	165	2	1	1	0	0	99.3	58.8732	60.1	3	0	0	0	0	0	0	0	0	25.3444	1.7368	0	0	0	3	0	1.74	0.94	0.918
414	78	1	1	53	155	2	2	1	0	0	106	38.0654	47.4	3	0	0	0	0	0	0	0	0	22.0604	1.471	0	0	0	4	0	4.62	1.92	3.157
415	53	2	1	89	177	3	2	1	1	0	71.5	132.976	47.4	3	0	0	0	0	0	0	0	0	28.4082	2.066	0	0	0	4	0	1.01	0.69	0.614
416	63	2	1	80	166	3	3	1	0	0	80	94.5496	52.5	3	0	0	0	0	0	0	0	0	29.0318	1.8837	0	0	0	2	0	1.51	0.53	0.668
417	81	1	1	62	175	2	2	0	1	1	101.4	44.297	42.7	3	0	0	0	0	0	0	0	0	20.2449	1.7082	0	0	0	3	0	4.84	1.77	2.706
418	76	1	1	78	170	3	1	1	0	0	100.2	61.1752	64.7	3	0	0	0	0	0	0	0	0	26.9896	1.8825	0	0	0	4	0	2.17	1.07	1.091
419	72	1	2	64	160	3	2	1	0	0	93.7	48.4772	65.4	3	0	0	1	0	0	0	0	0	25	1.6423	0	0	0	3	0	3.63	2.24	2.784
420	69	2	1	52	148	2	2	1	0	0	94.9	47.771	48.1	3	0	0	1	0	0	0	0	0	23.74	1.4155	0	0	0	3	0	3.84	1.39	1.892
421	60	2	2	56	155	2	2	0	0	0	47.4	98.6478	62.1	3	0	0	0	0	0	0	0	0	23.3091	1.5094	0	0	0	4	0	1.4	0.69	0.843
422	63	2	1	62	168	3	3	0	0	0	79.8	73.4596	57.1	3	0	0	0	0	0	0	0	0	21.9671	1.6655	0	0	0	4	0	1.83	0.7	0.99
423	57	2	1	68	165	3	2	1	0	0	80.2	86.4135	66.3	3	0	0	0	0	0	0	0	0	24.977	1.724	0	0	0	3	0	1.1	0.96	0.648
424	63	2	1	80	171	2	3	0	0	0	97.2	77.8186	52.5	3	0	0	0	0	0	0	0	0	27.3588	1.9142	0	0	0	5	0	1.37	0.83	0.95
425	69	2	1	56	163	2	2	1	0	0	113.5	43.0149	68.1	3	0	0	0	0	0	0	0	0	21.0772	1.5582	0	0	0	3	0	2.51	1.06	1.115
426	66	2	1	69	173	1	2	1	1	0	75.4	83.1531	70.4	3	0	0	0	0	0	0	0	0	23.0546	1.7856	0	0	0	4	0	1.5	0.75	1.035
427	70	1	1	65	160	2	1	1	1	0	98.6	56.6635	61	3	0	0	0	0	0	0	0	0	25.3906	1.6551	0	0	0	5	0	1.97	3.83	0.708
428	63	2	1	65	165	2	2	1	0	1	82.5	74.4936	61.2	3	0	0	0	0	0	0	0	0	23.8751	1.6856	0	0	0	3	0	1.35	0.58	0.415
429	67	2	1	62	173	1	2	1	1	0	80.9	68.6965	58	3	0	1	0	0	0	0	0	0	20.7157	1.696	0	0	0	4	1	1.36	0.58	0.586
430	59	2	1	86	173	2	2	1	0	0	91.3	93.6875	61.7	3	0	1	0	0	0	0	0	0	28.7347	2.0032	0	0	0	5	1	0.68	0.83	0.393
431	60	2	1	65	171	2	2	0	0	0	68.9	92.673	67.4	3	0	0	0	0	0	0	0	0	22.2291	1.7222	0	0	0	2	0	0.97	0.83	0.622
432	60	2	1	89	180	2	2	1	0	0	96.4	90.6926	56.2	3	0	0	0	0	0	0	0	0	27.4691	2.0843	0	0	0	4	0	0.74	0.55	0.393
433	62	2	1	55	170	2	2	0	0	0	114.3	46.0872	59.8	3	0	0	0	0	0	0	0	0	19.0311	1.5881	0	0	0	3	0	1.7	0.82	0.888
434	65	2	1	80	171	2	1	1	0	1	79.6	92.5565	64.4	3	0	0	0	0	0	0	0	0	27.3588	1.9142	0	0	0	4	0	1.12	0.79	0.556
435	75	1	1	78	176	2	1	1	0	0	121.6	51.1969	63.5	3	0	0	0	0	0	0	0	0	25.1808	1.9191	0	0	0	3	0	2.21	0.62	0.481
436	69	2	1	74	176	2	2	1	0	0	156.8	41.1446	64.7	3	0	0	0	0	0	0	0	0	23.8895	1.8679	0	0	0	3	0	2.18	0.64	1.131
437	71	1	1	71	170	2	3	1	0	0	124.8	48.2016	68.7	3	0	0	0	0	0	0	0	0	24.5675	1.7929	0	0	0	3	0	2.97	0.7	2.08
438	67	2	1	65	167	2	2	0	0	0	76.1	76.5633	71.1	3	0	0	0	0	0	0	0	0	23.3067	1.6978	0	0	0	3	0	1.43	0.48	0.669
439	64	2	1	76	170	2	2	1	0	0	94.6	74.973	63.7	3	0	0	0	0	0	0	0	0	26.2976	1.8569	0	0	0	4	0	1.18	0.33	0.724
440	64	2	1	79	169	3	2	1	0	0	78	94.5181	60.1	3	0	0	0	0	0	0	0	0	27.6601	1.8892	0	0	0	3	0	1.25	0.6	0.944
441	62	2	1	69	174	2	3	0	0	0	85.4	77.3846	65.8	3	0	0	0	0	0	0	0	0	22.7903	1.7917	0	0	0	3	0	1.3	1.2	0.415
442	55	2	1	78	175	2	1	1	0	0	79.9	101.891	65.4	2	0	0	0	0	0	0	0	0	25.4694	1.913	0	0	0	2	0	0.64	0.67	0.553
443	72	1	1	65	170	3	3	1	1	1	172.4	31.4814	50	3	0	2	0	1	0	0	0	0	22.4913	1.7161	0	0	1	3	1	17.65	30.59	3.266
444	55	2	1	63	168	2	3	0	0	0	60.2	109.227	55	3	0	0	0	0	0	0	0	0	22.3214	1.6783	0	0	0	4	0	1.18	0.41	0.972
445	67	2	1	62	165	2	2	1	1	0	78.2	71.0684	58	2	0	0	0	0	0	0	0	0	22.7732	1.6472	0	0	0	3	0	1.69	1.11	1.727
446	69	2	2	75	167	3	2	1	0	0	64.2	86.571	63.7	3	0	0	0	3	0	0	0	0	26.8923	1.8258	0	0	1	3	0	1.99	0.88	0.711
447	67	2	1	72	172	2	2	0	0	1	84.2	76.65	60	3	0	0	0	2	0	0	0	0	24.3375	1.8179	0	0	1	3	0	1.4	0.83	0.895
448	75	1	2	70	155	2	2	1	1	0	86.5	54.9014	68.5	3	0	0	0	0	0	0	0	0	29.1363	1.6886	0	0	0	3	0	3.37	1.1	2.887
449	66	2	1	75	170	2	2	1	1	0	76.3	89.3177	66.4	3	0	0	0	0	0	0	0	0	25.9516	1.8441	0	0	0	5	0	1.45	0.81	0.783
450	67	2	2	56	158	3	2	1	1	0	69.6	61.3041	66	2	0	0	0	0	0	0	0	0	22.4323	1.5277	0	0	0	3	0	2.53	0.85	0.869
451	50	2	1	68	178	2	1	0	1	0	88.2	85.2024	67	3	0	0	0	0	0	0	0	0	21.4619	1.8033	0	0	0	3	0	0.83	0.57	0.469
452	61	2	1	54	160	2	3	0	0	1	78.5	66.7298	63.7	3	0	0	1	0	0	0	0	0	21.0938	1.5143	0	0	0	3	0	2.56	0.56	0.626
453	70	1	1	87	176	2	2	1	0	0	74.4	100.511	59.9	2	0	0	0	0	0	0	0	0	28.0863	2.0343	0	0	0	3	0	1.18	0.36	0.743
454	67	2	2	70	165	3	2	1	1	0	91.3	58.4168	65.9	2	0	0	0	0	0	0	0	0	25.7117	1.7496	0	0	0	2	0	2.2	1.62	1.428
455	72	1	1	74	170	2	2	1	0	0	147.9	41.7774	64.7	3	0	0	0	0	0	0	0	0	25.6055	1.8313	0	0	0	3	0	2.54	0.88	1.545
456	59	2	1	75	168	1	2	0	1	0	67.6	110.349	63.4	3	0	0	0	0	0	0	0	0	26.5731	1.8319	0	0	0	3	0	1.08	0.34	0.33
457	69	2	1	77	176	2	2	1	1	0	92.9	72.2607	59	3	0	0	0	0	0	0	0	0	24.858	1.9063	0	0	0	3	0	1.71	2.28	1.649
458	58	2	1	78	173	2	2	0	1	0	74	106.132	66	3	0	0	0	0	0	0	0	0	26.0617	1.9008	0	0	0	4	0	0.99	0.9	0.558
459	57	2	2	48	150	2	1	0	1	0	54.8	75.8799	64.7	3	0	0	0	0	0	0	0	0	21.3333	1.3765	0	0	0	3	0	1.86	0.88	1.47
460	67	2	1	76	165	2	1	1	0	0	78.5	86.7832	65.2	3	0	0	0	0	0	0	0	0	27.9155	1.8264	0	0	0	3	0	1.2	0.93	1.114
461	69	2	2	80	165	2	2	1	1	0	53.5	110.811	59.9	2	0	0	0	0	0	0	0	0	29.3848	1.8776	0	0	0	3	0	1.81	1.26	1.087
462	62	2	2	68	150	2	2	1	0	0	62.5	88.575	67.4	3	0	0	0	0	0	0	0	0	30.2222	1.6325	0	1	0	2	0	1.41	0.78	0.814
463	44	2	2	74	155	1	1	1	0	0	50.8	145.958	68.5	3	0	0	0	0	0	0	0	0	30.8012	1.7398	0	1	0	3	0	0.86	1.6	0.558
464	75	1	1	69	169	2	2	1	0	1	86.3	63.8147	69	3	0	0	0	0	0	0	0	0	24.1588	1.7612	0	0	1	3	0	2.22	1.4	1.413
465	56	2	1	74	160	2	1	1	0	0	85.1	89.6913	63.4	2	0	0	0	0	0	0	0	0	28.9062	1.7703	0	0	0	3	0	0.73	0.87	0.557
466	77	1	1	80	170	3	2	1	1	1	89.3	69.3024	60.6	3	0	0	0	0	0	0	0	0	27.6817	1.9081	0	0	0	3	0	2.76	1.11	1.36
467	73	1	1	78	175	1	2	1	0	0	91.9	69.8269	65.9	3	0	0	0	1	0	0	0	0	25.4694	1.913	0	0	0	3	1	1.67	0.83	0.478
468	72	1	1	57	165	2	2	0	0	0	79.9	59.567	68.7	3	0	0	0	0	0	0	0	0	20.9366	1.5832	0	0	0	4	0	2.2	0.76	0.725
469	62	2	1	72	170	2	2	1	0	0	83.2	82.8844	67.5	2	0	0	0	0	0	0	0	0	24.9135	1.8057	0	0	0	3	0	0.94	0.65	0.587
470	63	2	1	84	175	1	1	1	0	1	86.3	92.0297	63.7	3	0	0	0	0	0	0	0	0	27.4286	1.9898	0	0	0	3	0	0.98	0.32	0.374
471	75	1	1	76	168	2	2	1	0	1	84.4	71.871	60.9	3	0	0	0	0	0	0	0	0	26.9274	1.8447	0	0	0	3	0	2.06	0.63	1.92
472	63	2	1	75	168	3	2	1	1	0	53.6	132.299	66	2	0	0	0	0	0	0	0	0	26.5731	1.8319	0	0	0	2	0	1.28	0.47	0.478
473	61	2	2	56	158	2	1	1	0	0	71.2	64.8519	64.4	3	0	0	0	0	0	0	0	0	22.4323	1.5277	0	0	0	3	0	1.36	1.17	0.741
474	50	2	1	77	165	3	2	1	0	0	70.6	120.531	50.8	3	0	0	0	0	0	0	0	0	28.2828	1.8392	0	0	0	3	0	0.83	1	0.44
475	68	2	1	72	163	2	2	1	0	0	70.5	90.2911	61.7	3	0	0	0	0	0	0	0	0	27.0993	1.763	0	0	0	3	0	1.4	0.52	0.764
476	54	2	1	78	172	2	2	1	1	0	77.5	106.282	61	3	0	0	0	0	0	0	0	0	26.3656	1.8947	0	0	0	2	0	0.95	0.33	0.522
477	76	1	1	58	160	3	2	1	1	1	118	38.6273	63.4	3	0	0	0	0	0	0	0	0	22.6562	1.5655	0	0	0	3	0	5.29	2.54	1.743
478	69	2	1	76	173	3	3	1	1	0	150.6	43.9963	63.1	2	0	0	1	0	0	0	0	0	25.3934	1.8752	0	0	0	3	0	4.28	1.69	0.574
479	42	2	2	57	165	1	1	1	0	0	57.4	101.573	63.7	3	0	0	0	0	0	0	0	0	20.9366	1.5832	0	0	0	3	0	0.95	0.58	0.437
480	70	1	2	45	156	3	3	0	0	0	55.2	59.5606	58.9	3	0	0	1	0	0	0	0	0	18.4911	1.3747	0	0	0	3	0	4.52	5.53	1.232
481	53	2	1	74	170	2	1	1	0	0	89.8	88.0326	61	3	0	0	0	0	0	0	0	0	25.6055	1.8313	0	0	0	2	0	0.73	0.63	0.582
482	65	2	1	80	172	2	2	1	0	1	79.8	92.3246	63.4	3	0	0	0	0	0	0	0	0	27.0416	1.9203	0	0	0	3	0	1.09	0.69	0.527
483	60	2	2	84	165	2	2	1	0	0	66.7	105.155	71	2	0	0	1	0	0	0	0	0	30.854	1.9288	0	1	0	2	0	0.98	0.4	0.373
484	68	2	2	67	155	2	2	0	0	0	54.9	91.7113	64.4	2	0	0	0	0	0	0	0	0	27.8876	1.6502	0	0	0	3	0	1.61	0.48	0.611
485	67	2	1	81	168	2	2	1	0	0	83.1	87.3727	63.4	3	0	0	0	0	0	0	0	0	28.699	1.9087	0	0	0	3	0	1.24	0.63	0.647
486	67	2	1	60	164	1	2	1	0	0	82.9	64.8767	61	3	0	0	0	0	0	0	0	0	22.3081	1.6155	0	0	0	3	0	1.65	0.54	1.15
487	69	2	1	69	170	2	1	1	0	1	120.7	49.839	66.4	3	0	0	0	0	0	0	0	0	23.8754	1.7673	0	0	0	3	0	2	0.59	1.219
488	50	2	1	81	164	1	2	0	1	0	86	104.087	64	3	0	0	0	0	0	0	0	0	30.116	1.8843	0	1	0	4	0	0.89	1.32	0.683
489	60	2	1	74	173	2	2	0	0	0	88.3	82.3247	63.4	3	0	0	0	0	0	0	0	0	24.7252	1.8496	0	0	0	2	0	0.94	0.64	0.694
490	62	2	1	70	165	2	3	1	0	0	64.4	104.106	64	3	0	0	0	0	0	0	0	0	25.7117	1.7496	0	0	0	5	0	1.35	0.43	0.564
491	69	2	1	64	175	2	1	0	0	0	68.3	81.6933	63	3	0	0	0	0	0	0	0	0	20.898	1.7338	0	0	0	3	0	1.35	0.45	0.472
492	63	2	1	68	171	2	1	1	0	0	99.2	64.8122	67	3	0	0	0	0	0	0	0	0	23.255	1.7606	0	0	0	3	0	1.14	0.94	0.813
493	62	2	2	54	160	2	3	1	0	0	69.5	63.2545	59.9	3	0	0	0	0	0	0	0	0	21.0938	1.5143	0	0	0	3	0	1.79	0.62	0.892
494	59	2	1	71	167	2	1	0	0	0	62.9	112.269	67	3	0	0	0	0	0	0	0	0	25.4581	1.7746	0	0	0	3	0	0.85	0.31	0.581
495	77	1	1	65	165	3	2	1	0	0	138.5	36.3056	50.9	3	0	0	0	0	0	0	0	0	23.8751	1.6856	0	0	1	3	0	4.41	2.14	3.005
496	75	1	1	62	169	2	1	1	0	0	83.2	59.4772	70.4	3	0	0	0	0	0	0	0	0	21.7079	1.6716	0	0	0	2	0	1.84	1.16	1.546
497	72	1	1	65	160	2	1	1	1	0	93.2	58.2338	62.1	3	0	0	0	0	0	0	0	0	25.3906	1.6551	0	0	0	2	0	2.34	1.18	0.926
498	60	2	1	72	173	2	2	1	0	0	42.2	167.602	61	3	0	0	0	0	0	0	0	0	24.0569	1.824	0	0	0	3	0	0.87	1.06	0.538
499	70	1	1	64	170	2	3	1	1	0	92.1	59.7293	53.7	2	0	0	0	0	0	0	0	0	22.1453	1.7033	0	0	0	3	0	2.71	1.63	0.627
500	72	1	1	58	165	2	2	1	1	0	82.8	58.4892	63.4	1	0	0	0	0	0	0	0	0	21.3039	1.596	0	0	0	2	0	2.04	0.75	0.79
501	47	2	1	66	168	1	1	0	0	0	93.9	80.2657	61.9	3	0	0	0	0	0	0	0	0	23.3844	1.7167	0	0	0	3	0	0.78	0.77	0.365
502	72	1	1	64	170	2	2	1	0	0	125.2	42.6829	63.4	3	0	0	0	0	0	0	0	0	22.1453	1.7033	0	0	0	3	0	2.58	0.9	0.961
503	60	2	2	61	159	2	3	0	1	0	47.9	106.334	62	3	0	0	0	0	0	0	0	0	24.1288	1.5978	0	0	0	3	0	1.96	0.56	1.518
504	75	1	1	65	162	2	1	1	0	0	124.6	41.6368	62.1	3	0	0	1	0	0	0	0	0	24.7676	1.6673	0	0	0	3	0	2.88	1.28	1.529
505	61	2	2	50	158	2	3	0	0	0	69.8	59.0649	64.7	2	0	0	0	0	0	0	0	0	20.0288	1.4509	0	0	0	3	0	2.15	1.68	0.976
506	70	1	1	73.5	170	2	1	1	0	0	80.7	78.2854	67.9	3	0	0	0	0	0	0	0	0	25.4325	1.8249	0	0	0	4	0	1.35	0.36	0.387
507	75	1	1	90	175	1	1	1	0	0	110.9	64.7729	59.8	3	0	0	0	0	0	0	0	0	29.3878	2.0666	0	0	0	4	0	0.95	0.22	0.198
508	69	2	1	72	168	3	3	1	1	0	80.6	77.8798	66	3	0	0	0	0	0	0	0	0	25.5102	1.7935	0	0	0	4	0	2.16	0.91	1.224
509	67	2	1	64	175	3	2	1	0	0	74.1	77.4201	67.4	3	0	0	0	0	0	0	0	0	20.898	1.7338	0	0	0	4	0	1.57	1.31	0.913
510	66	2	2	52	155	3	2	1	0	0	64.2	62.5587	70.4	3	0	0	0	0	0	0	0	0	21.6441	1.4582	0	0	0	3	0	2.42	0.85	2.081
511	68	2	1	90	179	2	2	1	1	1	83.3	95.521	61.7	2	0	0	0	0	0	0	0	0	28.089	2.091	0	0	0	3	0	1.43	0.76	0.571
512	65	2	1	55	167	2	2	1	0	0	92.3	54.8771	64.4	3	0	0	0	0	0	0	0	0	19.721	1.5698	0	0	0	4	0	1.67	0.25	0.672
513	55	2	1	60	162	3	3	0	0	0	91.1	68.7418	67.4	3	0	0	0	0	0	0	0	0	22.8624	1.6033	0	0	0	4	0	1.64	0.62	1.431
514	66	2	1	57	165	2	3	1	0	0	73.6	70.3716	63.4	3	0	0	0	0	0	0	0	0	20.9366	1.5832	0	0	0	1	0	2.06	0.92	1.423
515	64	2	1	58	163	2	2	0	0	0	71.4	75.8075	58	3	0	0	0	0	0	0	0	0	21.83	1.5838	0	0	0	3	0	1.45	1.37	0.575
516	63	2	1	80	170	2	2	1	0	0	65.8	114.954	54	3	0	0	0	0	0	0	0	0	27.6817	1.9081	0	0	0	3	0	0.97	0.46	0.436
517	62	2	1	66	170	1	2	0	0	0	83.3	75.8861	61	2	0	0	0	0	0	0	0	0	22.8374	1.7289	0	0	0	2	0	0.97	0.44	0.356
518	75	1	1	81	180	2	3	1	1	1	138.1	46.8138	50.5	3	0	0	0	0	1	0	0	0	25	1.9819	0	0	0	3	0	4.62	0.51	1.277
519	79	1	1	54	167	2	2	0	0	1	111.4	36.3084	63	3	0	0	0	0	0	0	0	0	19.3625	1.557	0	0	0	2	0	4.25	1.02	2.884
520	54	2	1	83	184	1	2	1	1	0	65	134.844	57	3	0	0	0	0	0	0	0	0	24.5156	2.0319	0	0	0	2	0	0.86	0.79	0.454
521	64	2	1	77	180	2	3	1	0	1	127.4	56.4032	63	3	0	0	0	0	0	0	0	0	23.7654	1.9307	0	0	0	4	0	1.85	1.38	1.607
522	58	2	1	66	160	1	2	1	0	0	82	81.0425	62.4	3	0	0	0	0	0	0	0	0	25.7812	1.6679	0	0	0	3	0	1.05	2.76	1.411
523	63	2	1	66	165	2	2	1	1	0	94.2	66.2449	63	2	0	0	0	0	0	0	0	0	24.2424	1.6984	0	0	0	3	0	1.38	0.41	0.571
524	68	2	1	66	168	2	2	0	0	0	81	72.0378	64.7	3	0	0	0	0	0	0	0	0	23.3844	1.7167	0	0	0	4	0	1.47	3.16	0.938
525	54	2	2	59	156	2	1	1	0	0	53.5	98.9884	61.2	3	0	0	0	0	0	0	0	0	24.2439	1.5539	0	0	0	4	0	1.08	0.64	0.776
526	77	1	1	58	155	3	2	1	1	0	67.2	66.768	60.7	3	0	0	1	0	0	0	0	0	24.1415	1.535	0	0	0	3	0	4.57	1.04	2.324
527	66	2	1	80	169	1	2	0	0	0	74.3	97.8367	61.9	3	0	0	0	0	0	0	0	0	28.0102	1.902	0	0	0	2	0	1.16	0.78	0.612
528	56	2	1	78	168	2	1	0	0	0	74.6	107.846	72	1	0	0	0	0	0	0	0	0	27.6361	1.8703	0	0	0	1	0	0.58	0.42	0.215
529	55	2	2	58	160	2	1	0	1	0	62.7	82.0667	50.5	3	0	0	0	0	0	0	0	0	22.6562	1.5655	0	0	0	3	0	1.34	0.84	0.423
530	68	2	1	67	171	2	1	1	0	0	91.3	64.8792	63.3	3	0	0	0	0	0	0	0	0	22.913	1.7478	0	0	0	1	0	1.35	0.61	0.668
531	58	2	2	73	156	2	3	1	0	0	52.4	119.232	68	3	0	0	0	0	0	0	0	0	29.9967	1.7331	0	0	0	4	0	1.4	0.7	0.745
532	60	2	1	78	171	1	1	1	0	0	87.3	87.7686	66.9	3	0	0	0	0	0	0	0	0	26.6749	1.8886	0	0	0	2	0	0.82	0.51	0.584
533	75	1	2	73	162	3	1	1	0	0	90.6	54.6633	63.7	3	0	0	0	0	0	0	0	0	27.8159	1.7697	0	0	0	3	0	2.73	0.58	1.376
534	63	2	1	69	170	2	2	1	1	0	66.3	98.4	68	3	0	0	0	0	0	0	0	0	23.8754	1.7673	0	0	0	4	0	1.32	0.62	0.646
535	55	2	1	74	176	1	2	1	1	0	78.5	98.3898	60	3	0	0	0	0	0	0	0	0	23.8895	1.8679	0	0	0	4	0	0.95	0.54	0.411
536	70	1	1	72	175	2	2	1	0	0	117.5	52.6698	64.4	3	0	0	0	0	0	0	0	0	23.5102	1.8362	0	0	0	3	0	1.87	1.66	1.251
537	59	2	1	84	163	2	1	1	0	0	88.9	93.9791	61	3	0	0	0	0	0	0	0	0	31.6158	1.9166	0	1	0	4	0	0.79	1	0.271
538	67	2	1	63	164	2	1	1	1	1	67.3	83.9107	60	3	0	0	0	0	0	0	0	0	23.4236	1.6539	0	0	0	4	0	1.86	0.93	1.192
539	57	2	1	78	170	2	1	0	0	0	91	87.3575	69.7	3	0	0	0	0	0	0	0	0	26.9896	1.8825	0	0	0	4	0	0.78	0.48	0.485
540	75	1	1	75	172	2	2	1	0	0	96.7	61.9038	59.8	2	0	0	0	0	0	0	0	0	25.3515	1.8563	0	0	1	3	0	1.98	1.8	1.619
541	57	2	1	70	173	2	2	0	1	0	61.9	115.254	67.4	3	0	0	0	0	0	0	0	0	23.3887	1.7984	0	0	0	2	0	1.02	0.52	0.926
542	51	2	1	70	165	2	2	1	0	0	100.8	75.8921	61	3	0	0	0	0	0	0	0	0	25.7117	1.7496	0	0	0	4	0	0.94	0.69	0.544
543	75	1	1	50	168	2	2	0	0	1	74.8	53.352	60	3	0	0	0	0	0	0	0	0	17.7154	1.5119	0	0	0	4	0	3.29	0.79	1.329
544	58	2	2	56	150	2	2	1	0	0	75.1	63.819	63	3	0	0	0	0	0	0	0	0	24.8889	1.4789	0	0	0	4	0	1.32	0.66	0.518
545	67	2	1	53	165	2	1	1	0	0	77.3	61.4594	69.6	3	0	0	1	0	0	0	0	0	19.4674	1.532	0	0	0	2	0	1.72	4.67	0.855
546	60	2	1	80	170	2	2	1	0	0	114.5	68.6346	67.4	3	0	0	0	0	0	0	0	0	27.6817	1.9081	0	0	0	4	0	1.12	0.93	0.447
547	60	2	1	73	169	3	2	1	0	0	93	77.1079	65	3	0	0	0	0	0	0	0	0	25.5593	1.8124	0	0	0	4	0	1.14	0.68	0.613
548	64	2	1	71	168	3	2	1	0	0	49.7	133.317	61.5	3	0	0	0	0	0	0	0	0	25.1559	1.7807	0	0	0	4	0	1.14	0.48	0.532
549	64	2	2	44	147	2	2	1	0	0	46.8	74.5776	61.2	3	0	0	0	0	0	0	0	0	20.3619	1.307	0	0	0	4	0	1.93	0.69	0.973
550	61	2	1	60	165	3	2	0	0	0	75.1	77.501	67.5	1	0	0	0	0	0	0	0	0	22.0386	1.6216	0	0	0	2	0	1.09	0.67	0.461
551	72	1	1	87	175	2	1	1	0	0	76.4	95.0832	61.7	1	0	0	0	0	0	0	0	0	28.4082	2.0282	0	0	0	2	0	1.04	0.29	0.592
552	62	2	1	61	168	2	2	0	0	0	58.5	99.8706	61.2	3	0	0	0	0	0	0	0	0	21.6128	1.6527	0	0	0	3	0	1.18	0.56	0.49
553	66	2	1	74	165	2	1	1	1	0	72	93.3899	66.9	3	0	0	0	0	0	0	0	0	27.1809	1.8008	0	0	0	4	0	1.09	0.43	0.57
554	63	2	2	61	155	2	2	0	0	0	51.4	95.3774	62	2	0	0	0	0	0	0	0	0	25.3902	1.5734	0	0	0	3	0	1.35	0.37	0.396
555	67	2	1	71	168	2	2	1	1	0	82.6	77.0495	69.7	3	0	0	0	0	0	0	0	0	25.1559	1.7807	0	0	0	4	0	1.63	1.94	1.319
556	73	1	2	62	150	2	1	0	1	0	56.9	76.1977	63.6	2	0	0	0	0	0	0	0	0	27.5556	1.5557	0	0	0	3	0	2.56	2.46	2.537
557	66	2	1	67	165	3	2	1	0	0	64.6	94.2417	65	3	0	2	0	0	0	0	0	0	24.6097	1.7112	0	0	0	4	1	2.65	4.49	1.5
558	64	2	2	73	163	3	2	1	1	0	59.3	97.6494	62.4	3	0	0	0	0	0	0	0	0	27.4756	1.7758	0	0	0	2	0	1.45	0.84	0.386
559	62	2	1	71	160	2	2	1	0	0	82.2	82.7275	63	3	0	0	0	0	0	0	0	0	27.7344	1.7319	0	0	0	4	0	1.29	0.67	0.458
560	75	1	1	56	158	3	2	1	1	1	58.5	76.4037	59	3	0	0	0	0	0	0	0	0	22.4323	1.5277	0	0	0	3	0	4.49	1.16	1.987
561	73	1	1	72	172	2	2	1	0	1	59.8	99.0547	69	3	0	0	0	0	0	0	0	0	24.3375	1.8179	0	0	0	4	0	1.81	0.8	0.73
562	66	2	1	71	160	2	2	1	0	0	72.4	89.1088	65.2	3	0	0	0	0	0	0	0	0	27.7344	1.7319	0	0	0	3	0	1.35	0.17	0.398
563	65	2	1	80	170	2	2	1	0	0	87.9	83.8168	66.4	3	0	0	0	0	0	0	0	0	27.6817	1.9081	0	0	0	4	0	1.12	1.11	0.459
564	72	1	1	73	165	2	2	1	0	0	79.8	76.3832	69	3	0	0	0	0	0	0	0	0	26.8136	1.788	0	0	0	2	0	1.7	1.25	0.974
565	59	2	1	61	169	2	2	1	0	0	73.3	82.7713	67	3	0	0	0	0	0	0	0	0	21.3578	1.6588	0	0	0	3	0	1.05	1.01	0.929
566	65	2	1	76	164	2	2	1	0	0	71.8	97.4808	62.4	3	0	0	0	0	0	0	0	0	28.257	1.8203	0	0	0	1	0	1.18	0.76	0.633
567	61	2	1	67	170	2	2	0	1	0	76.2	85.2935	63	3	0	0	0	0	0	1	0	0	23.1834	1.7417	0	0	0	4	0	1.59	0.82	0.699
568	66	2	1	73	170	2	2	0	1	0	91	72.8924	64.7	3	0	0	0	0	0	0	0	0	25.2595	1.8185	0	0	0	2	0	1.55	1.19	0.416
569	73	1	1	70	170	2	2	0	0	0	65.3	88.1919	60	3	0	0	0	0	0	0	0	0	24.2215	1.7801	0	0	0	3	0	1.74	0.21	0.62
570	55	2	2	48	150	2	2	0	1	0	57	74.709	69.2	3	0	0	0	0	0	0	0	0	21.3333	1.3765	0	0	0	2	0	2.01	0.49	1.1
571	76	1	1	57	164	2	2	1	1	0	106.6	42.021	59	3	0	0	0	0	0	0	0	0	21.1927	1.5771	0	0	0	3	0	4.12	1.38	1.779
572	76	1	1	63	165	3	2	0	1	0	71.2	69.536	66.3	3	0	0	0	0	0	0	0	0	23.1405	1.66	0	0	0	3	0	3.41	0.75	1.828
573	67	2	2	55	155	2	3	1	0	0	53	79.0674	64.7	3	0	0	0	0	0	0	0	0	22.8928	1.4966	0	0	0	3	0	2.63	0.44	3.056
574	68	2	1	60	161	2	2	1	0	0	94.6	56.074	60.6	3	0	0	0	0	1	0	0	0	23.1473	1.5972	0	0	0	3	0	1.88	0.6	0.846
575	66	2	1	63	161	2	2	1	0	0	66.5	86.0834	61.9	3	0	0	0	0	0	0	0	0	24.3046	1.6356	0	0	0	4	0	1.48	0.58	0.768
576	54	2	1	57	175	1	2	1	0	0	64.3	93.6119	69	3	0	0	0	0	0	1	0	0	18.6122	1.6442	0	0	0	4	0	1.19	0.55	0.776
577	68	2	2	60	165	2	2	1	0	1	50.3	89.6404	57	3	0	0	0	0	0	0	0	0	22.0386	1.6216	0	0	0	4	0	2.46	1.04	1.723
578	73	1	1	85	166	2	2	1	1	0	83.7	83.5482	67.9	3	0	0	0	0	0	0	0	0	30.8463	1.9477	0	1	0	4	0	1.95	1.1	0.798
579	62	2	2	56	165	2	2	1	0	0	47	97.0002	63	3	0	0	0	0	0	0	0	0	20.5693	1.5704	0	0	0	4	0	1.4	1.35	0.438
580	67	2	2	56	156	3	1	1	1	0	48.5	87.9745	66.1	3	0	0	0	0	0	0	0	0	23.0112	1.5155	0	0	0	4	0	2.22	0.73	1.896
581	55	2	1	59	162	2	2	0	0	0	65.5	94.0153	69.9	3	0	0	0	0	0	0	0	0	22.4813	1.5905	0	0	0	4	0	1.07	1.82	0.81
582	63	2	1	70	165	3	3	1	0	0	85.7	77.2284	66.9	3	1	0	0	0	0	0	0	0	25.7117	1.7496	0	0	1	2	0	1.94	0.76	1.617
583	68	2	1	74	170	3	2	1	1	0	79.3	82.5011	66.9	3	0	0	0	0	0	0	0	0	25.6055	1.8313	0	0	0	1	0	1.87	0.72	0.761
584	45	2	1	80	180	3	2	1	0	0	107.1	87.1351	65.4	3	0	0	0	1	0	0	0	0	24.6914	1.9691	0	0	0	4	1	0.95	0.34	0.283
585	57	2	2	76	160	3	1	1	1	1	101.3	64.9935	69	3	0	0	0	0	0	0	0	0	29.6875	1.7959	0	0	0	2	0	1.95	1.17	1.09
586	73	1	2	54	150	3	2	1	1	0	87.7	43.0583	64	3	0	0	0	0	0	0	0	0	24	1.4533	0	0	0	2	0	4.57	4.17	5.024
587	60	2	1	79	175	2	2	0	0	0	97	80.0045	65	3	0	0	0	0	0	0	0	0	25.7959	1.9258	0	0	0	3	0	0.95	0.38	0.469
588	61	2	1	83	174	2	2	1	1	0	148	54.4017	66.4	3	0	0	0	0	0	1	0	0	27.4145	1.9709	0	0	0	1	0	2.14	1.05	1.473
589	60	2	2	75	165	3	2	1	1	0	53.1	117.935	62.7	3	0	0	0	0	0	0	0	0	27.5482	1.8136	0	0	0	1	0	1.59	0.41	0.528
590	66	2	2	85	160	1	2	1	0	0	76.8	85.4825	60	3	0	0	0	0	0	0	0	0	33.2031	1.9111	0	1	0	2	0	2.77	2	1.77
591	76	1	1	60	172	3	2	1	0	0	99.7	47.2939	61.7	3	0	0	0	0	0	0	0	0	20.2812	1.6643	0	0	0	2	0	2.7	1.64	1.764
592	64	2	1	64	167	2	2	0	0	0	83.9	71.187	68	3	0	0	0	0	0	0	0	0	22.9481	1.685	0	0	0	4	0	2.91	1.22	1.677
593	66	2	2	58	160	2	2	1	0	0	65	68.9182	67.4	3	0	0	0	0	0	0	0	0	22.6562	1.5655	0	0	0	1	0	1.79	1.57	1.246
594	68	2	1	80	170	2	2	1	0	0	104.8	67.4885	64.4	3	0	0	0	0	0	0	0	0	27.6817	1.9081	0	0	0	1	0	1.48	0.6	1.506
595	73	1	1	64	168	2	2	0	0	0	75	70.2041	65.9	3	0	0	0	0	0	0	0	0	22.6757	1.6911	0	0	0	3	0	1.93	0.56	1.115
596	70	1	1	46	163	3	2	0	0	1	89.7	44.0791	64.4	3	0	0	0	0	0	0	0	0	17.3134	1.4302	0	0	0	1	0	4.57	1.7	1.314
597	77	1	2	74	152	2	2	1	0	1	64.2	75.7923	70	3	0	0	0	0	0	0	0	0	32.0291	1.7215	0	1	0	2	0	3.2	1.45	3.153
598	71	1	1	78	170	2	2	1	0	0	89.2	74.088	69.1	3	0	0	0	0	0	1	0	0	26.9896	1.8825	0	0	0	2	0	1.92	1.39	2.473
599	44	2	1	70	163	2	2	0	0	0	63.2	130.563	65	3	0	0	0	0	0	0	0	0	26.3465	1.7374	0	0	0	3	0	0.78	0.57	0.51
600	61	2	1	81	170	2	2	1	0	0	64	122.772	64.4	3	0	0	0	0	0	0	0	0	28.0277	1.9209	0	0	0	2	0	0.91	0.73	0.495
601	67	2	1	72	170	2	2	1	1	0	77.9	82.8489	68.8	3	0	0	0	0	0	0	0	0	24.9135	1.8057	0	0	0	4	0	1.58	0.77	1.319
602	74	1	1	70	175	2	2	1	0	0	86.1	65.8882	64	3	0	0	0	0	0	0	0	0	22.8571	1.8106	0	0	0	2	0	1.67	1.08	1.231
603	72	1	1	70	175	2	2	1	1	1	96.5	60.5687	67.4	3	0	0	0	0	0	0	0	0	22.8571	1.8106	0	0	0	3	0	2.39	1.87	1.578
604	54	2	1	78	172	2	1	1	0	0	84.9	97.0184	60.9	3	0	0	0	0	0	0	0	0	26.3656	1.8947	0	0	0	4	0	0.7	0.53	0.402
605	59	2	1	75	155	2	1	0	0	0	78.5	95.0267	65	3	0	0	0	0	0	0	0	0	31.2175	1.7526	0	1	0	4	0	0.95	0.25	0.363
606	68	2	1	75	155	2	2	1	0	0	67.6	98.088	69.6	3	0	0	0	0	0	0	0	0	31.2175	1.7526	0	1	0	3	0	1.46	0.45	0.678
607	61	2	1	72	165	2	2	1	1	0	103.9	67.2222	71.4	3	0	0	0	0	0	0	0	0	26.4463	1.7752	0	0	0	4	0	1.43	0.83	0.571
608	68	2	1	62	172	2	2	1	1	1	73.5	74.5771	65	3	0	0	0	0	0	0	0	0	20.9573	1.6899	0	0	0	3	0	2.01	1.56	0.766
609	67	2	1	73	171	2	2	1	0	0	97.2	67.3207	66.4	3	0	0	0	0	0	0	0	0	24.9649	1.8246	0	0	0	3	0	1.37	1.36	1.324
610	72	1	1	58	160	3	1	0	0	0	97.1	49.8754	60.7	3	0	0	0	0	0	0	0	0	22.6562	1.5655	0	0	0	3	0	2.7	2.88	1.794
611	77	1	2	67	150	2	1	1	1	1	81	54.3899	61	3	0	0	0	0	0	0	0	0	29.7778	1.6197	0	0	0	2	0	3.45	0.71	2.069
612	54	2	1	70	169	2	2	1	0	0	78.3	94.4069	65.9	3	0	0	0	0	0	0	0	0	24.5089	1.774	0	0	0	3	0	0.83	1.57	0.679
613	68	2	1	48	165	3	2	0	0	0	91.9	46.1771	61	3	0	0	0	0	0	0	0	0	17.6309	1.468	0	0	0	3	0	3.44	1.62	1.839
614	78	1	1	73	175	4	2	1	1	1	74	75.102	54.9	3	0	0	0	0	0	0	0	0	23.8367	1.849	0	0	0	3	0	3.75	1.16	1.853
615	59	2	2	48	152	3	2	0	0	0	59.1	68.6636	66.4	3	0	0	0	0	0	0	0	0	20.7756	1.3887	0	0	0	4	0	1.97	0.73	0.993
616	61	2	1	85	168	2	2	1	1	0	79.4	103.847	65.8	3	0	0	0	0	0	0	0	0	30.1162	1.9599	0	1	0	3	0	1.1	0.31	0.792
617	66	2	1	70	170	2	2	1	0	0	88.4	71.9526	66.9	3	0	0	0	0	0	0	0	0	24.2215	1.7801	0	0	0	3	0	1.28	0.64	0.488
618	73	1	1	75	168	2	1	1	1	1	202.1	30.5308	66.4	3	0	0	0	0	0	0	0	0	26.5731	1.8319	1	0	0	3	0	4.87	1.05	4.901
619	69	2	1	77	165	2	2	1	0	0	76	88.3292	66	3	0	0	0	0	0	0	0	0	28.2828	1.8392	0	0	0	3	0	1.38	0.57	0.528
620	77	1	1	71	169	4	2	1	0	1	91	60.3568	64.7	3	0	0	0	0	0	1	0	0	24.8591	1.7868	0	0	0	2	0	2.53	1.13	1.774
621	68	2	1	57	163	4	2	0	0	1	171	29.47	45.9	3	0	0	0	0	0	0	0	0	21.4536	1.571	0	0	0	3	0	4.78	1.78	3.264
622	59	2	1	72	164	2	2	1	0	0	69.2	103.486	64	3	0	0	0	0	0	0	0	0	26.7698	1.7691	0	0	0	3	0	1.23	1.01	0.965
623	71	1	1	81	170	2	2	1	0	1	90.9	75.4986	67.4	3	0	0	0	0	0	0	0	0	28.0277	1.9209	0	0	0	3	0	1.68	0.85	0.76
624	62	2	2	66	161	2	2	1	1	0	55.1	97.5157	65	3	0	0	0	0	0	0	0	0	25.462	1.674	0	0	0	4	0	1.61	1.28	0.956
625	63	2	1	100	160	2	2	1	1	0	90	105.055	62.7	3	0	0	0	0	0	0	0	0	39.0625	2.1031	0	1	0	4	0	1.22	0.65	0.734
626	65	2	1	68	170	2	2	0	1	0	81.8	76.5572	64.7	3	0	0	0	0	0	0	0	0	23.5294	1.7545	0	0	0	4	0	1.51	0.5	0.653
627	63	2	1	100	160	2	3	1	1	0	90	105.055	62.7	3	0	0	0	0	0	0	0	0	39.0625	2.1031	0	1	0	3	0	1.54	0.53	1.095
628	67	2	1	80	172	2	2	1	0	1	104.8	68.4259	60.9	3	0	0	0	0	0	0	0	0	27.0416	1.9203	0	0	0	5	0	1.56	1.22	0.839
629	76	1	1	72	171	2	1	0	0	0	95.5	59.2486	63.7	3	0	0	0	0	0	0	0	0	24.623	1.8118	0	0	0	2	0	1.74	0.85	0.944
630	72	1	2	68	157	2	2	1	0	0	59.2	81.5237	68.5	3	0	0	0	0	0	0	0	0	27.5873	1.6752	0	0	0	2	0	2.19	0.42	1.37
631	59	2	1	65	174	3	2	0	0	1	102.8	62.8889	48	3	0	0	0	0	0	0	0	0	21.4692	1.7405	0	0	0	2	0	1.43	0.5	0.805
632	60	2	1	76	168	2	2	1	0	0	75.7	98.6226	65	3	0	0	0	0	0	0	0	0	26.9274	1.8447	0	0	0	3	0	0.94	0.56	0.382
633	72	1	2	54	155	2	2	1	1	0	58	66.0789	47.5	3	0	0	0	0	0	0	0	0	22.4766	1.4838	0	0	0	3	0	4.22	2.98	2.747
634	70	1	2	65	152	1	2	0	0	0	72.9	65.1436	61.5	3	0	0	0	0	0	0	0	0	28.1337	1.6063	0	0	0	3	0	2.18	3.05	1.592
635	71	1	1	66	170	2	2	1	0	0	85.8	65.174	62.7	3	0	0	0	0	0	0	0	0	22.8374	1.7289	0	0	0	2	0	1.71	1.43	1.527
636	60	2	1	73	168	2	2	1	0	0	48.7	147.249	64.4	3	0	0	0	0	1	0	0	0	25.8645	1.8063	0	0	0	4	0	1.16	0.6	1.006
637	63	2	1	60	158	2	2	1	1	0	79.5	71.3582	60	3	0	0	0	0	0	0	0	0	24.0346	1.5789	0	0	0	4	0	1.79	0.73	0.78
638	50	2	1	73	168	2	2	0	1	0	63.7	126.647	68.7	3	0	0	0	0	0	0	0	0	25.8645	1.8063	0	0	0	4	0	0.9	1	1.548
639	60	2	2	65	159	3	3	1	1	0	53.5	101.447	61.9	3	0	0	1	0	0	0	0	0	25.711	1.649	0	0	0	3	0	2.25	0.51	0.773
640	68	2	2	65	160	3	2	1	1	1	87	56.1454	66.4	3	0	0	0	0	0	0	0	0	25.3906	1.6551	0	0	0	3	0	3.16	1.12	1.533
641	80	1	1	62	170	2	2	0	0	0	94.3	48.4396	65.7	3	0	0	0	0	0	0	0	0	21.4533	1.6777	0	0	0	3	0	3.08	2.47	1.548
642	85	1	1	56	163	2	2	1	0	0	101.2	37.3714	60.1	2	0	0	0	0	0	0	0	0	21.0772	1.5582	0	0	0	2	0	4.42	4.3	2.698
643	41	2	1	90	175	2	3	1	0	0	75.4	145.103	64	3	0	0	0	0	0	0	0	0	29.3878	2.0666	0	0	0	4	0	0.85	0.45	0.489
644	73	1	1	66	178	2	3	0	1	0	85.3	63.6559	61	3	0	0	0	0	0	0	0	0	20.8307	1.7777	0	0	0	3	0	1.63	0.42	0.718
645	65	2	1	78	185	4	3	0	0	0	64.7	111.025	50.3	3	0	0	0	2	0	1	0	0	22.7904	1.974	0	0	0	3	0	2.15	0.49	2.083
646	71	1	1	65	160	3	3	1	0	0	64.1	85.9159	60.2	3	0	0	0	0	0	0	0	0	25.3906	1.6551	0	0	0	2	0	2.82	0.75	0.998
647	45	2	1	89	178	2	1	0	0	0	78.6	132.087	68.4	2	0	0	0	0	0	0	0	0	28.0899	2.0721	0	0	0	3	0	0.55	0.46	0.31
648	72	1	1	72	175	2	2	0	1	0	80.5	74.6817	63	3	0	0	0	0	0	0	0	0	23.5102	1.8362	0	0	0	3	0	1.95	0.7	0.991
649	65	2	1	65	163	3	2	1	1	0	73	82.0013	65.9	3	0	0	0	0	0	0	0	0	24.4646	1.6734	0	0	0	4	0	1.93	1.19	1.152
650	77	1	1	75	175	3	2	1	0	1	93.2	62.2522	61.2	3	0	0	0	0	0	0	0	0	24.4898	1.8746	0	0	0	3	0	2.73	0.36	0.584
651	68	2	1	69	173	3	3	1	1	0	81.9	74.4846	58.9	3	0	0	0	0	0	0	0	0	23.0546	1.7856	0	0	0	4	0	2.51	1.17	1.746
652	65	2	1	80	171	2	2	1	0	0	86.1	85.5691	60.6	3	0	0	0	0	0	0	0	0	27.3588	1.9142	0	0	0	2	0	1.11	0.57	1.08
653	58	2	1	80	170	4	3	1	0	0	90.5	89.007	60.6	3	0	0	0	0	0	0	0	0	27.6817	1.9081	0	0	0	5	0	1.38	0.59	0.858
654	68	2	1	53	174	2	2	1	0	0	73.8	63.4923	63.4	2	0	0	0	0	0	0	0	0	17.5056	1.5869	0	0	0	3	0	1.54	0.68	0.553
655	62	2	2	65	158	3	2	1	0	0	54.7	96.7405	66.9	3	0	0	0	0	0	0	0	0	26.0375	1.6429	0	0	0	3	0	1.59	0.43	0.71
656	71	1	2	72	162	2	1	1	0	0	77.3	67.0795	68	3	0	0	0	0	0	0	0	0	27.4348	1.7569	0	0	0	4	0	1.83	0.72	0.964
657	60	2	1	71	160	2	2	0	0	0	56.6	123.226	69.2	2	0	0	0	0	0	0	0	0	27.7344	1.7319	0	0	0	2	0	0.89	0.77	1.467
658	69	2	2	63	160	3	2	1	1	1	75.1	62.1651	67.5	3	0	0	0	0	0	0	0	0	24.6094	1.6295	0	0	0	4	0	3.28	1.28	1.172
659	60	2	1	67	164	2	3	0	0	0	79.1	83.2065	63	3	0	0	0	0	0	0	0	0	24.9108	1.7051	0	0	0	3	0	1.32	0.94	0.745
660	69	2	1	51	158	2	2	1	0	1	89.4	49.7347	61.4	3	0	0	0	0	0	0	0	0	20.4294	1.4637	0	0	0	4	0	0.78	0.54	0.642
661	76	1	2	57	162	2	2	1	0	1	109.1	34.8994	50.8	2	0	0	0	0	0	0	0	0	21.7193	1.5649	0	0	0	2	0	3.37	0.82	1.915
662	60	2	1	93	168	2	3	0	0	0	111.9	81.6416	64	3	0	0	0	0	0	0	0	0	32.9507	2.0623	0	1	0	3	0	1.31	1.47	0.829
663	72	1	1	65	168	2	1	1	0	0	103.2	52.591	66.8	3	1	0	0	0	0	0	0	0	23.03	1.7039	0	0	0	5	0	2.55	0.82	1.26
664	70	1	1	77	177	2	2	1	1	1	75.3	87.8947	60.7	3	0	0	0	0	0	0	0	0	24.5779	1.9124	0	0	0	3	0	1.84	0.82	1.101
665	57	2	1	76	176	2	2	0	0	0	89.5	86.5441	69.4	3	0	0	0	0	0	0	0	0	24.5351	1.8935	0	0	0	5	0	0.83	0.59	0.238
666	75	1	2	62	154	2	1	1	0	0	72.9	57.6986	60	3	0	0	0	0	0	0	0	0	26.1427	1.5801	0	0	0	4	0	0.76	0.34	0.355
667	46	2	1	70	170	3	2	0	0	0	63.3	127.641	62	1	0	0	0	0	0	0	0	0	24.2215	1.7801	0	0	0	2	0	0.69	0.34	0.27
668	54	2	1	65	169	2	1	1	1	0	72.7	94.4162	64.7	3	0	0	0	0	0	0	0	0	22.7583	1.71	0	0	0	4	0	0.97	1.2	0.631
669	76	1	1	85	168	1	1	1	0	1	96.7	69.0782	63.7	3	0	0	0	0	0	0	0	0	30.1162	1.9599	0	1	0	3	0	1.99	1.09	0.552
670	63	2	1	76	170	2	1	1	1	0	92.5	77.684	62.1	3	0	0	0	0	0	0	0	0	26.2976	1.8569	0	0	0	3	0	1.23	1.25	0.629
671	53	2	1	84	178	2	1	1	1	0	58.5	153.395	62.7	3	0	0	0	0	0	0	0	0	26.5118	2.0081	0	0	0	4	0	0.76	0.51	0.317
672	64	2	1	80	163	2	1	1	0	0	72.3	103.26	64	1	0	0	0	0	0	0	0	0	30.1103	1.8654	0	1	0	1	0	0.91	0.44	0.775
673	70	1	1	84	174	2	2	1	0	1	105.2	68.6326	64	3	0	0	0	0	0	0	0	0	27.7447	1.9837	0	0	0	3	0	1.78	0.42	1.102
674	76	1	1	57	176	2	2	1	0	1	92.8	48.2698	62.7	3	0	0	0	0	0	0	0	0	18.4013	1.6503	0	0	0	4	0	2.77	2.63	0.992
675	63	2	1	72	160	2	1	1	1	0	104.2	65.3318	61	3	0	0	0	0	1	0	0	0	28.125	1.7447	0	0	0	3	0	1.95	1.5	1.264
676	75	1	1	70	175	2	1	1	1	0	83.2	67.1517	63.7	3	0	0	0	0	0	0	0	0	22.8571	1.8106	0	0	0	2	0	2.11	1.38	0.544
677	83	1	1	65	163	2	1	1	1	0	135.3	33.6248	63	3	0	0	0	0	0	0	0	0	24.4646	1.6734	0	0	0	4	0	4.92	3.95	3.281
678	62	2	2	61	156	2	1	1	1	0	61.1	81.2776	67.9	3	0	0	0	0	0	0	0	0	25.0657	1.5795	0	0	0	4	0	1.65	3.19	1.001
679	57	2	1	84	160	2	2	1	1	0	80.6	106.216	61.5	3	0	0	0	0	0	0	0	0	32.8125	1.8983	0	1	0	5	0	1.01	1.05	0.44
680	72	1	2	54	162	2	1	0	0	0	52.3	73.2806	69.4	3	0	0	0	0	0	0	0	0	20.5761	1.5265	0	0	0	2	0	2.25	1.01	1.294
681	82	1	1	60	158	2	2	0	0	1	83.4	51.2368	61.9	2	0	0	0	0	0	0	0	0	24.0346	1.5789	0	0	0	2	0	3.74	2.05	2.901
682	71	1	1	72	167	2	3	1	0	0	87.6	69.638	70	3	0	0	0	0	0	0	0	0	25.8166	1.7874	0	0	0	4	0	2.08	0.81	1.184
683	80	1	1	74	165	2	2	1	0	1	110.8	49.2053	58	3	0	0	0	0	0	0	0	0	27.1809	1.8008	0	0	0	4	0	3.45	1.61	1.676
684	64	2	2	53	166	3	1	1	0	0	67	62.7484	73	3	0	0	0	0	0	0	0	0	19.2336	1.5381	0	0	0	3	0	1.79	0.87	0.851
685	65	2	1	74	173	2	1	1	1	0	103.3	65.9723	66.9	3	0	0	0	0	0	0	0	0	24.7252	1.8496	0	0	0	4	0	1.46	0.8	0.601
686	66	2	1	73	166	2	2	1	0	0	79.9	83.0188	46.6	3	0	0	1	0	1	0	0	0	26.4915	1.7941	0	0	0	5	0	1.72	0.43	1
687	56	2	2	60	152	2	1	0	0	0	48	109.592	59.9	3	0	0	0	0	0	0	0	0	25.9695	1.5423	0	0	0	3	0	1.16	0.61	0.407
688	64	2	2	70	160	3	2	0	0	0	52	106.782	60	2	0	0	0	0	0	0	0	0	27.3438	1.7191	0	0	0	2	0	1.43	0.8	0.836
689	72	1	1	62	162	2	2	0	1	0	81.3	63.6765	65.6	3	0	0	0	0	0	0	0	0	23.6244	1.6289	0	0	0	3	0	2.53	1.24	1.087
690	70	1	1	75	168	2	2	1	1	1	80.6	79.9822	66.4	3	0	0	0	0	0	0	0	0	26.5731	1.8319	0	0	0	4	0	1.97	0.91	1.455
691	69	2	2	65	156	2	2	0	0	0	65.1	73.9909	65.2	3	0	0	0	0	0	0	0	0	26.7094	1.6307	0	0	0	4	0	1.95	1.19	1.091
692	80	1	1	78	162	2	2	1	0	0	101.4	56.6731	68	3	0	0	0	0	0	0	0	0	29.7211	1.8337	0	0	0	3	0	2.84	1.01	1.705
693	66	2	2	62	158	2	3	1	1	0	54.9	87.2246	66.3	2	0	0	0	0	0	0	0	0	24.8358	1.6045	0	0	0	3	0	2.35	1.65	1.696
694	78	1	2	64	150	2	2	1	1	1	59.5	69.6053	66	2	0	2	0	0	0	0	0	0	28.4444	1.5813	0	0	0	2	1	3.91	6.03	3.148
695	49	2	1	87	174	2	2	1	0	0	68.1	142.752	66.4	3	0	0	0	0	0	0	0	0	28.7356	2.0221	0	0	0	3	0	0.67	1.19	0.225
696	64	2	1	60	173	2	2	0	1	1	83.4	67.1379	61	3	0	0	0	3	0	0	0	0	20.0474	1.6704	0	0	0	5	0	1.76	1.02	0.817
697	56	2	1	67	171	2	1	1	0	0	71.2	97.0606	73	3	0	0	0	0	0	0	0	0	22.913	1.7478	0	0	0	3	0	0.79	0.58	0.23
698	64	2	1	83	176	2	2	1	0	0	108.1	71.6531	63.4	3	0	0	0	0	0	0	0	0	26.7949	1.9831	0	0	0	4	0	1.05	0.83	0.988
699	61	2	2	60	158	2	2	1	0	1	54	91.6162	54.4	3	0	0	0	0	0	0	0	0	24.0346	1.5789	0	0	0	4	0	1.52	0.64	0.625
700	65	2	2	53	155	2	2	0	0	0	60.5	68.5756	65	1	0	0	0	0	0	0	0	0	22.0604	1.471	0	0	0	1	0	1.51	0.59	0.385
701	66	2	1	65	170	3	2	1	1	1	63.2	93.4538	58	3	0	2	0	0	0	0	0	0	22.4913	1.7161	0	0	0	4	1	2.05	5.3	1.132
702	79	1	1	60	155	2	2	0	1	0	109.1	41.1932	66.4	3	0	0	0	0	0	0	0	0	24.974	1.5606	0	0	0	4	0	3.99	1.4	0.301
703	75	1	2	70	158	2	1	0	0	1	55.5	85.567	68.4	3	0	0	0	0	0	0	0	0	28.0404	1.7069	0	0	0	4	0	1.72	1.69	2.101
704	65	2	2	74	166	2	2	1	1	0	65.9	87.9013	64.8	1	0	0	0	0	0	0	0	0	26.8544	1.8069	0	0	0	1	0	1.36	1.27	0.834
705	72	1	1	74	171	2	2	1	0	0	114.1	54.1532	63.6	3	0	0	0	0	0	0	0	0	25.3069	1.8374	0	0	0	3	0	2.03	0.46	0.914
706	59	2	1	64	160	2	2	1	0	0	77	82.6691	62.1	3	0	0	0	0	0	0	0	0	25	1.6423	0	0	0	4	0	1.11	1.09	0.717
707	75	1	1	70	175	2	2	0	0	0	72.8	76.7448	65.4	3	0	0	0	0	0	0	0	0	22.8571	1.8106	0	0	0	4	0	1.84	0.6	1.249
708	51	2	2	78	157	2	2	1	0	0	58.4	124.068	60.1	3	0	0	0	0	0	0	0	0	31.6443	1.8032	0	1	0	3	0	0.95	0.35	0.261
709	45	2	1	70	165	2	1	1	0	0	93.8	87.0538	55.9	3	0	0	0	0	0	0	0	0	25.7117	1.7496	0	0	0	4	0	0.76	0.81	0.365
710	55	2	2	62	155	2	3	1	0	0	71	77.4712	58.9	3	0	0	0	0	0	0	0	0	25.8065	1.5862	0	0	0	4	0	1.35	0.48	0.424
711	81	1	2	45	150	2	2	1	0	1	70.4	39.3622	63.7	3	0	0	0	0	0	0	0	0	20	1.3381	0	0	0	2	0	5.74	4.24	5.15
712	62	2	1	80	172	2	2	1	0	0	98.4	77.8679	65	3	0	0	0	0	0	0	0	0	27.0416	1.9203	0	0	0	3	0	1.05	0.81	0.359
713	61	2	1	65	168	2	3	1	1	0	73.1	86.2565	64.4	3	0	0	1	0	0	0	0	0	23.03	1.7039	0	0	0	3	0	2.04	1.07	0.504
714	57	2	1	75	170	3	3	1	1	0	93.2	82.0148	60.9	3	0	0	0	0	0	0	0	0	25.9516	1.8441	0	0	0	4	0	1.6	1.02	0.674
715	67	2	2	69	158	2	1	1	0	0	73.3	71.7226	69.9	3	0	0	0	0	0	0	0	0	27.6398	1.6941	0	0	0	3	0	1.58	0.86	1.242
716	73	1	1	75	175	2	1	0	0	0	89.4	69.0188	67.4	3	0	0	0	0	0	0	0	0	24.4898	1.8746	0	0	0	3	0	1.51	6.86	1.072
717	57	2	1	61	170	2	2	1	0	0	84.5	73.5733	70.4	3	0	0	0	0	0	0	0	0	21.1073	1.6649	0	0	0	3	0	2.83	0.78	2.337
718	78	1	2	69	158	2	2	1	0	0	91	49.0667	67.5	3	0	0	0	0	0	0	0	0	27.6398	1.6941	0	0	0	4	0	3.25	0.89	1.262
719	76	1	1	73	170	2	2	1	0	1	91.3	62.8349	67	3	0	0	0	0	0	0	0	0	25.2595	1.8185	0	0	0	4	0	2.26	0.96	2.091
720	63	2	1	76	172	2	2	1	0	0	125.9	57.0752	66.4	3	0	0	0	0	0	0	0	0	25.6896	1.8691	0	0	0	1	0	0.76	0.52	0.321
721	75	1	1	84	175	2	1	0	1	1	98.5	68.0652	61	3	0	0	0	0	0	0	0	0	27.4286	1.9898	0	0	0	3	0	2.33	1.11	0.938
722	65	2	1	65	174	2	1	1	0	0	76.6	78.1474	67.4	3	0	0	0	0	0	0	0	0	21.4692	1.7405	0	0	0	4	0	1.14	0.54	0.937
723	63	2	1	55	160	2	1	0	0	0	97.1	53.5554	62.1	3	0	0	0	0	0	0	0	0	21.4844	1.5271	0	0	0	4	0	1.6	0.43	1.158
724	75	1	1	70	165	2	2	1	0	1	91.7	60.9272	47.5	3	0	0	0	0	0	0	0	0	25.7117	1.7496	0	0	0	3	0	2.4	0.82	1.179
725	66	2	1	71	169	2	2	1	0	1	116.1	55.5683	63.4	3	0	0	0	0	0	0	0	0	24.8591	1.7868	0	0	0	4	0	1.79	1.08	1.136
726	65	2	1	62	170	2	2	1	0	0	98.4	58.0265	65.6	3	0	0	0	0	0	0	0	0	21.4533	1.6777	0	0	0	4	0	1.47	0.9	0.785
727	60	2	1	80	168	2	2	1	0	0	84.9	92.5638	65	3	0	0	0	0	0	0	0	0	28.3447	1.8959	0	0	0	4	0	0.92	0.47	0.346
728	57	2	1	90	174	3	1	1	0	0	70.6	129.923	60.1	3	0	0	0	0	0	0	0	0	29.7265	2.0605	0	0	0	4	0	0.76	0.56	0.296
729	70	1	1	70	170	3	2	1	1	0	102.2	58.8727	61.5	3	0	0	0	0	0	0	0	0	24.2215	1.7801	0	0	0	4	0	2.51	0.6	1.104
730	71	1	1	61	162	2	1	1	0	0	105.6	48.9422	64.7	3	0	0	0	0	0	0	0	0	23.2434	1.6161	0	0	0	3	0	2.16	1.16	1.718
731	66	2	1	63	165	2	3	1	0	0	105.1	54.4676	65	3	0	0	0	0	0	0	0	0	23.1405	1.66	0	0	0	3	0	2.21	0.84	0.921
732	72	1	1	67	160	2	3	1	0	1	89.8	62.2983	55	3	0	0	0	0	0	0	0	0	26.1719	1.6807	0	0	0	4	0	2.93	3.14	1.604
733	58	2	2	60	158	2	2	1	0	1	55.8	92.0277	68.8	3	0	0	0	0	0	0	0	0	24.0346	1.5789	0	0	0	4	0	1.37	0.59	1.022
734	67	2	1	74	165	2	1	1	0	1	94.8	69.9705	66.9	3	0	0	0	0	0	0	0	0	27.1809	1.8008	0	0	0	2	0	1.41	4.1	1.02
735	69	2	1	67	168	2	2	0	0	0	103.4	56.4913	63.3	2	0	0	0	0	0	0	0	0	23.7387	1.7295	0	0	0	2	0	1.57	3.42	0.805
736	70	1	1	73	172	2	2	1	1	1	87.5	71.7103	64.4	3	1	0	0	0	0	0	0	0	24.6755	1.8307	0	0	0	3	0	2.66	0.74	1.01
737	78	1	1	69	170	3	2	1	1	0	87.2	60.2411	67	3	0	0	0	0	0	0	0	0	23.8754	1.7673	0	0	1	3	0	3.54	1.92	2.323
738	44	2	1	70	170	2	2	0	0	0	88.3	93.4496	70.4	3	0	0	0	0	0	0	0	0	24.2215	1.7801	0	0	0	3	0	0.76	0.56	0.313
739	57	2	1	63	165	2	2	1	0	0	67	95.8325	69	3	0	0	1	0	0	0	0	0	23.1405	1.66	0	0	0	3	0	1.25	0.39	0.745
740	63	2	1	82	165	2	1	1	0	0	77.5	100.04	59.8	3	0	0	1	0	0	0	0	0	30.1194	1.9032	0	1	0	4	0	1.15	0.84	0.642
741	69	2	1	78	170	2	1	0	0	1	90.7	74.9747	64.7	3	0	0	0	0	0	0	0	0	26.9896	1.8825	0	0	0	4	0	1.41	0.54	1.244
742	68	2	1	60	168	2	2	0	0	1	71.7	73.9833	70.8	2	0	0	0	0	0	0	0	0	21.2585	1.6399	0	0	0	2	0	1.58	0.54	0.955
743	70	1	1	68	169	2	2	1	0	1	73.3	79.7392	69	3	0	0	0	0	0	0	0	0	23.8087	1.7484	0	0	0	4	0	3.02	0.88	1.578
744	47	2	1	68	165	2	2	1	1	0	71.7	108.303	66.9	1	0	0	0	0	0	0	0	0	24.977	1.724	0	0	0	3	0	1.41	1.2	0.97
745	80	1	1	74	166	3	2	1	1	0	78.9	69.0995	68.5	3	0	0	0	0	0	0	0	0	26.8544	1.8069	0	0	1	4	0	1.98	1	4.489
746	66	2	1	96	173	2	2	1	0	0	75.7	115.233	65.5	3	0	0	0	0	0	0	0	0	32.0759	2.1312	0	1	0	4	0	1.08	1.12	0.859
747	63	2	1	80	170	2	2	1	1	1	77.9	97.0984	58	3	0	0	0	0	0	0	0	0	27.6817	1.9081	0	0	0	3	0	1.35	0.34	0.392
748	78	1	1	69	170	3	1	1	0	0	87.2	60.2411	67	3	0	0	0	0	0	0	0	0	23.8754	1.7673	0	0	0	3	0	2.43	1.66	1.344
749	69	2	2	72	168	2	2	1	0	1	73	73.0896	64.7	3	1	0	1	0	0	0	0	0	25.5102	1.7935	0	0	0	3	0	3.32	1.03	2.224
750	66	2	1	69	175	3	2	1	1	0	76.7	81.7437	54.9	3	0	0	0	0	0	0	0	0	22.5306	1.7978	0	0	0	4	0	1.74	1.02	1.179
751	75	1	2	72	160	2	2	1	1	1	101.4	48.1721	68.5	3	0	0	0	0	0	0	0	0	28.125	1.7447	0	0	0	3	0	3.89	1.96	1.809
752	66	2	2	48	150	2	2	1	0	0	60.5	61.2781	66.3	3	1	0	0	0	0	0	0	0	21.3333	1.3765	0	0	0	4	0	3.31	1.22	0.933
753	51	2	2	40	155	3	2	0	1	0	98.2	37.8378	68	3	0	0	0	0	0	0	0	0	16.6493	1.3046	0	0	0	2	0	2.18	2.64	1.05
754	59	2	1	56	160	2	2	0	0	0	85.9	64.8409	64	3	0	0	0	0	0	0	0	0	21.875	1.5399	0	0	0	4	0	1.31	0.51	0.717
755	59	2	1	70	165	2	3	1	0	0	116.3	59.8649	70	3	1	0	0	0	0	0	0	0	25.7117	1.7496	0	0	0	3	0	2.1	0.86	1.239
756	70	1	1	75	166	2	2	1	1	1	83.5	77.2043	64	3	1	0	0	0	0	0	0	0	27.2173	1.8197	0	0	0	5	0	2.73	0.52	1.729
757	58	2	1	79	175	2	3	1	1	0	83.8	94.9218	41.2	3	0	0	0	0	0	0	0	0	25.7959	1.9258	0	0	0	3	0	1.43	0.82	0.501
758	70	1	1	76	173	2	1	0	1	0	67.7	96.4921	59	3	0	0	0	0	0	0	0	0	25.3934	1.8752	0	0	0	4	0	1.56	0.76	0.675
759	77	1	1	90	172	2	2	1	0	1	80.3	86.7035	58.9	3	0	0	0	0	0	0	0	0	30.4218	2.0483	0	1	0	4	0	1.81	0.6	0.569
760	59	2	1	52	168	2	3	1	1	0	84.1	61.498	61.2	3	0	0	0	0	0	0	0	0	18.424	1.5375	0	0	0	3	0	2.01	1.1	1.353
761	66	2	1	67	170	2	2	1	0	0	98.3	61.933	68	3	0	0	0	0	0	0	0	0	23.1834	1.7417	0	0	0	3	0	1.43	0.82	0.654
762	72	1	2	57	150	2	2	1	0	1	64.1	63.1122	63	3	0	0	0	0	0	0	0	0	25.3333	1.4917	0	0	0	4	0	3.44	0.56	1.674
763	76	1	1	75	168	2	1	1	0	1	99.4	59.2958	69	3	0	0	0	0	0	0	0	0	26.5731	1.8319	0	0	0	4	0	2.22	2.58	1.396
764	78	1	1	75	170	2	2	0	0	1	87.2	65.4795	61.5	3	0	0	0	0	0	0	0	0	25.9516	1.8441	0	0	0	3	0	2.38	1.1	0.839
765	59	2	1	82	165	2	1	1	1	0	66.5	122.644	58	3	0	0	0	0	0	0	0	0	30.1194	1.9032	0	1	0	5	0	0.95	0.45	0.566
766	72	1	1	60	164	2	2	1	1	1	70.7	70.8614	65.9	3	0	0	0	0	0	0	0	0	22.3081	1.6155	0	0	0	4	0	2.86	0.7	2.649
767	72	1	1	60	170	3	2	1	0	1	97.4	51.4363	64.8	3	0	0	0	0	0	0	0	0	20.7612	1.6521	0	0	0	4	0	2.78	1.18	2.336
768	67	2	2	64	160	3	1	1	1	0	92.2	52.8883	69	3	0	0	0	0	0	0	0	0	25	1.6423	0	0	0	3	0	2.45	0.63	1.019
769	73	1	1	60	170	2	3	1	0	0	71.9	68.654	61.9	3	0	0	1	0	0	0	0	0	20.7612	1.6521	0	0	0	3	0	3.31	0.79	3.028
770	61	2	1	72	170	3	3	0	0	0	80.6	86.655	53.7	3	0	0	0	0	1	0	0	0	24.9135	1.8057	0	0	0	3	0	1.86	0.52	1.589
771	69	2	1	65	161	2	1	1	0	0	79.6	71.1914	65.4	3	0	0	0	0	0	0	0	0	25.0762	1.6612	0	0	0	3	0	1.56	1.48	0.669
772	48	2	1	74	166	2	2	1	1	0	56.4	148.221	69.4	3	0	0	0	0	0	0	0	0	26.8544	1.8069	0	0	0	4	0	0.9	0.53	0.626
773	72	1	1	70	165	2	1	1	1	0	89.1	65.5991	40.9	3	0	0	1	0	0	0	0	0	25.7117	1.7496	0	0	0	3	0	2.91	0.64	2.075
774	77	1	1	68	165	2	2	1	0	1	67.7	77.7016	59.8	3	0	0	0	0	0	0	0	0	24.977	1.724	0	0	0	3	0	2.48	2.81	0.938
775	57	2	1	69	163	2	3	0	0	0	74.9	93.8889	64	3	0	0	0	0	0	0	0	0	25.9701	1.7246	0	0	0	4	0	1.22	0.67	0.832
776	58	2	1	62	165	2	2	0	0	0	91.1	68.5261	70	2	0	0	0	0	0	0	0	0	22.7732	1.6472	0	0	0	2	0	0.97	0.5	0.448
777	56	2	1	87	170	3	1	0	0	0	64	140.213	64	1	0	0	0	0	0	0	0	0	30.1038	1.9977	0	1	0	1	0	0.62	1.1	0.274
778	68	2	1	71	166	2	1	1	1	0	97.5	64.3806	58.9	3	0	0	0	0	0	0	0	0	25.7657	1.7685	0	0	0	4	0	1.76	0.39	1.151
779	70	1	1	84	175	2	1	1	0	0	110.2	65.5186	70.4	2	0	0	0	0	0	0	0	0	27.4286	1.9898	0	0	0	3	0	1.33	1.79	1.15
780	60	2	1	80	170	2	1	1	0	1	111.1	70.7351	60.9	3	0	0	0	0	0	0	0	0	27.6817	1.9081	0	0	0	4	0	1.1	0.35	0.363
781	60	2	1	78	175	2	1	0	0	0	70.5	108.684	66.4	3	0	0	0	0	0	0	0	0	25.4694	1.913	0	0	0	3	0	0.78	0.3	0.466
782	59	2	2	62	162	2	1	0	0	0	64.7	81.014	44.5	3	0	0	1	0	0	0	0	0	23.6244	1.6289	0	0	0	4	0	1.22	1.04	0.599
783	59	2	2	77	168	3	3	1	0	0	60	108.496	67.4	3	0	0	0	0	0	0	0	0	27.2817	1.8575	0	0	0	2	0	1.61	0.52	1.441
784	54	2	1	95	168	2	1	1	0	0	88.1	113.872	67.8	3	0	0	0	0	0	0	0	0	33.6593	2.0879	0	1	0	4	0	0.69	0.34	0.281
785	58	2	1	88	172	2	1	1	1	0	64.2	138.016	60.9	3	0	0	0	0	0	0	0	0	29.7458	2.0227	0	0	0	4	0	0.88	0.66	0.319
786	49	2	2	73	164	2	2	0	0	0	67.3	103.024	62.7	2	0	0	0	0	0	0	0	0	27.1416	1.7819	0	0	0	3	0	0.8	0.73	0.481
787	62	2	1	77	170	2	2	0	1	0	78.7	93.7086	61.9	3	0	0	0	0	0	0	0	0	26.6436	1.8697	0	0	0	4	0	1.21	0.35	0.545
788	73	1	1	75	178	2	2	0	0	0	73.6	83.8353	69.4	3	0	0	0	0	0	0	0	0	23.6713	1.8929	0	0	0	3	0	1.59	0.49	0.526
789	76	1	1	80	177	2	2	0	0	1	88.3	71.1997	69.6	3	0	0	0	0	0	0	0	0	25.5354	1.9508	0	0	0	3	0	1.05	0.81	0.769
790	77	1	2	48	156	2	2	0	0	1	60.8	51.9118	66.9	3	0	0	0	0	0	0	0	0	19.7239	1.4131	0	0	0	3	0	4.35	1.3	1.966
791	77	1	1	72	172	3	1	1	1	0	105.9	52.5952	65.8	3	0	0	0	0	0	0	0	0	24.3375	1.8179	0	0	0	4	0	2.48	1.38	1.666
792	79	1	1	64	160	2	2	1	0	1	56.1	85.4507	62.4	3	0	0	0	0	0	0	0	0	25	1.6423	0	0	0	4	0	3.19	1.73	1.208
793	79	1	1	65	165	2	1	0	0	0	64.8	75.1341	35.1	3	0	0	0	0	0	0	0	0	23.8751	1.6856	0	0	0	2	0	3	7.46	2.939
794	75	1	2	50	150	3	2	1	1	1	104.6	32.4294	66.3	3	0	0	0	0	0	0	0	0	22.2222	1.4021	0	0	1	3	0	5.79	2.98	3.943
795	70	1	2	56	155	3	2	1	1	0	138.7	29.4983	63	3	0	0	0	0	0	0	0	0	23.3091	1.5094	0	0	1	4	0	4.48	1.64	2.658
796	67	2	1	60	162	2	2	1	0	1	136	39.5461	67.4	3	0	0	0	0	0	0	0	0	22.8624	1.6033	0	0	0	3	0	2.93	0.76	3.034
797	68	2	1	73	175	3	3	1	0	0	72.6	88.8971	62.4	3	0	0	0	0	0	0	0	0	23.8367	1.849	0	0	0	4	0	1.88	0.56	0.909
798	69	2	1	70	168	2	1	1	0	0	75.8	80.5112	60.1	3	0	0	0	0	0	0	0	0	24.8016	1.7679	0	0	0	3	0	1.35	0.29	0.408
799	63	2	2	55	158	3	2	1	1	0	45.3	97.576	60	3	0	0	0	0	0	0	0	0	22.0317	1.5149	0	0	0	3	0	2.27	2.12	2.877
800	58	2	1	71	162	2	2	1	1	0	136.8	52.2583	63.2	3	0	0	0	0	0	0	0	0	27.0538	1.7441	0	0	0	4	0	1.79	0.75	1.343
801	64	2	1	76	170	2	2	1	0	1	85.7	82.759	67.4	3	0	0	0	0	0	0	0	0	26.2976	1.8569	0	0	0	4	0	1.34	0.38	0.756
802	84	1	1	61	170	3	2	1	0	1	80.3	52.2362	62.1	1	0	0	0	0	0	0	0	0	21.1073	1.6649	0	0	0	1	0	3.45	3.33	2.481
803	40	2	1	73	160	2	2	0	0	0	83.7	107.094	63.1	1	0	0	0	0	0	0	0	0	28.5156	1.7575	0	0	0	1	0	0.66	0.56	0.352
804	56	2	1	65	168	2	2	1	0	0	93.4	71.7819	66.9	3	0	0	0	0	0	0	0	0	23.03	1.7039	0	0	0	4	0	0.98	0.59	0.43
805	70	1	1	75	173	2	2	1	1	1	79.2	81.396	70.4	3	0	0	0	0	0	0	0	0	25.0593	1.8624	0	0	0	5	0	1.93	0.8	1.275
806	72	1	2	66	158	2	1	1	0	1	65.2	71.8444	62.4	3	0	0	0	0	0	0	0	0	26.4381	1.6557	0	0	0	4	0	2.25	1.77	0.887
807	54	2	1	70	170	2	3	1	0	0	91.8	80.5235	41.6	3	0	0	0	0	0	0	0	0	24.2215	1.7801	0	0	0	5	0	1.25	0.42	0.747
808	72	1	2	62	158	2	2	1	1	0	70	62.8623	65.2	3	0	0	0	0	0	0	0	0	24.8358	1.6045	0	0	0	4	0	2.99	1.23	1.903
809	71	1	1	75	170	2	2	1	1	0	65.4	97.1631	64.4	3	0	0	0	0	1	0	0	0	25.9516	1.8441	0	0	0	3	0	2.36	1.05	1.087
810	76	1	1	61	163	2	2	1	0	1	74.1	64.6935	70.4	3	0	0	0	0	0	0	0	0	22.9591	1.6222	0	0	0	4	0	2.78	1.57	1.661
811	78	1	1	55	172	2	2	0	0	0	83.9	49.907	60	2	0	0	0	0	0	0	0	0	18.5911	1.6003	0	0	0	3	0	2.47	0.94	0.553
812	58	2	1	71	171	2	1	1	0	0	83.7	85.4114	52.5	3	0	0	0	0	0	0	0	0	24.281	1.799	0	0	0	4	0	0.83	0.52	0.398
813	82	1	1	70	175	2	2	0	1	1	79.1	63.0258	56.9	3	0	0	0	0	0	0	0	0	22.8571	1.8106	0	0	0	3	0	3.28	1.5	1.558
814	70	1	2	63	162	2	1	0	0	1	47.6	96.6984	63.7	3	0	0	0	0	0	0	0	0	24.0055	1.6417	0	0	0	2	0	1.95	2.6	0.73
815	59	2	1	64	173	2	1	1	0	0	78.6	80.9863	64.7	3	0	0	0	0	0	0	0	0	21.3839	1.7216	0	0	0	4	0	0.93	0.53	0.532
816	65	2	1	76	170	2	2	1	1	0	67.8	103.232	60.1	3	0	0	0	0	0	0	0	0	26.2976	1.8569	0	0	0	4	0	1.35	0.68	0.576
817	39	2	1	78	170	2	1	0	0	0	86.7	111.575	61.5	3	0	0	0	0	0	0	0	0	26.9896	1.8825	0	0	0	4	0	0.68	1.49	0.347
818	61	2	1	69	170	3	2	1	0	1	68.6	97.571	38.5	2	0	0	1	0	0	0	0	0	23.8754	1.7673	0	0	0	3	0	1.6	0.75	0.79
819	56	2	2	60	160	2	2	1	1	0	66.2	79.4622	68.7	3	0	0	0	0	0	0	0	0	23.4375	1.5911	0	0	0	3	0	1.46	0.54	1.102
820	61	2	2	61	158	2	2	1	0	0	64	78.5895	67.9	3	0	0	0	0	0	0	0	0	24.4352	1.5917	0	0	0	3	0	1.37	0.51	0.658
821	65	2	2	55	155	2	1	1	1	0	53.2	80.9282	57.1	3	0	0	0	0	0	0	0	0	22.8928	1.4966	0	0	0	3	0	2.08	1.18	2.289
822	60	2	2	75	155	2	2	1	0	0	128.7	48.6587	65.4	3	1	0	0	0	0	0	0	0	31.2175	1.7526	0	1	0	3	0	2.3	0.55	1.428
823	48	2	1	77	176	2	2	1	0	0	73.6	118.187	64.7	3	0	0	0	0	0	0	0	0	24.858	1.9063	0	0	0	1	0	0.69	0.43	0.418
824	60	2	1	85	174	2	2	1	1	0	61.7	135.33	70.4	2	0	0	0	0	0	0	0	0	28.075	1.9965	0	0	0	2	0	0.89	1.43	0.965
825	55	2	1	80	176	2	1	1	0	0	76.2	109.578	65.2	2	0	0	0	0	0	0	0	0	25.8264	1.9447	0	0	0	3	0	0.62	0.22	0.294
826	49	2	1	80	169	2	1	1	0	0	77	116.094	65.9	3	0	0	0	0	0	0	0	0	28.0102	1.902	0	0	0	3	0	1	1.28	0.97
827	67	2	1	63	169	3	1	1	0	0	89	63.4516	57	3	0	0	0	0	0	0	0	0	22.0581	1.6844	0	0	0	3	0	1.6	0.8	0.711
828	51	2	1	78	176	2	1	1	0	0	73.1	116.61	69	2	0	0	0	0	0	0	0	0	25.1808	1.9191	0	0	0	2	0	0.55	1.03	0.384
829	70	1	1	66	172	2	1	1	1	0	73.5	77.1833	67.4	3	0	0	0	0	0	0	0	0	22.3094	1.7411	0	0	0	3	0	1.77	0.67	1.068
830	56	2	1	82	163	2	2	1	0	0	103.2	81.9563	62.4	3	0	0	0	0	0	0	0	0	30.863	1.891	0	1	0	4	0	0.95	0.42	0.378
831	68	2	1	86	168	2	2	0	0	0	93.8	81.0582	62.4	3	0	0	0	0	0	0	0	0	30.4705	1.9727	0	1	0	2	0	1.3	1.05	0.814
832	75	1	1	77	170	2	2	1	0	0	98.1	62.6475	61.7	3	0	0	0	0	0	0	0	0	26.6436	1.8697	0	0	0	3	0	1.98	1.14	1.012
833	57	2	1	78	175	2	2	0	1	0	76.7	103.644	73	3	0	0	0	0	0	0	0	0	25.4694	1.913	0	0	0	4	0	0.97	0.27	0.299
834	66	2	2	59	158	4	2	1	1	0	65.4	69.6777	52.8	3	0	0	0	0	0	0	0	0	23.634	1.5661	0	0	1	3	0	2.99	0.85	1.455
835	57	2	1	80	170	3	2	1	1	1	71.3	114.353	44.6	3	0	0	0	0	0	0	0	0	27.6817	1.9081	0	0	0	4	0	1.33	0.76	0.785
836	70	1	1	68	170	2	2	1	1	1	85.7	68.2017	66.9	3	1	0	0	0	0	0	0	0	23.5294	1.7545	0	0	0	4	0	2.92	1.34	1.699
837	71	1	2	62	161	2	1	1	0	0	80.9	55.1925	59	3	0	0	0	0	0	0	0	0	23.9188	1.6228	0	0	0	3	0	2.01	1.19	1.31
838	75	1	1	70	170	2	2	1	0	1	96.5	57.8966	63.6	3	0	0	0	0	0	0	0	0	24.2215	1.7801	0	0	0	3	0	2.31	0.72	0.546
839	70	1	1	55	167	2	2	1	0	1	109	43.3714	63.6	3	0	0	0	0	0	0	0	0	19.721	1.5698	0	0	0	3	0	2.76	1.23	1.482
840	73	1	1	72	170	2	1	1	1	1	72	82.2704	62.4	3	0	0	0	0	0	0	0	0	24.9135	1.8057	0	0	0	3	0	2.12	0.89	2.185
841	75	1	1	84	176	2	1	1	0	0	81.6	82.1621	63	3	0	1	0	0	0	0	0	0	27.1178	1.9959	0	0	0	3	1	1.57	0.76	0.675
842	75	1	2	60	150	2	1	1	1	0	60.1	67.7295	61.2	3	0	0	0	0	0	0	0	0	26.6667	1.5301	0	0	0	3	0	3.41	0.95	2.1
843	60	2	2	51	158	2	2	1	0	0	48	88.717	62.4	3	0	0	0	0	0	0	0	0	20.4294	1.4637	0	0	0	4	0	1.49	0.77	0.73
844	48	2	2	70	162	2	2	1	0	0	67.6	99.4322	69	2	0	0	0	0	0	0	0	0	26.6728	1.7313	0	0	0	3	0	0.83	1.77	0.333
845	70	1	2	65	160	2	2	1	1	1	63	75.3804	55.5	3	0	0	0	0	0	0	0	0	25.3906	1.6551	0	0	0	3	0	2.76	1.57	1.628
846	75	1	1	84	165	2	2	1	1	1	85.5	78.4143	59	3	0	0	0	0	0	0	0	0	30.854	1.9288	0	1	0	3	0	2.42	1.29	1.262
847	70	1	1	64	165	2	3	1	0	1	65.8	83.6028	59.8	3	0	0	0	0	0	0	0	0	23.5078	1.6728	0	0	0	3	0	2.4	0.69	1.025
848	64	2	1	101	178	3	3	1	1	1	66	142.81	58	3	0	0	0	0	1	1	1	0	31.8773	2.2257	0	1	0	4	0	2.6	1.58	1.507
849	63	2	1	82	171	3	2	1	0	0	79.1	98.016	63	3	0	0	0	0	0	0	0	0	28.0428	1.9398	0	0	0	3	0	1.15	0.85	0.36
850	57	2	1	91	170	2	2	1	0	1	125.8	73.7238	66.3	3	1	0	0	0	0	0	0	0	31.4879	2.0489	0	1	0	3	0	1.57	1.03	0.803
851	72	1	1	70	170	2	2	1	0	1	94.1	62.1135	65.4	3	0	0	0	0	0	0	0	0	24.2215	1.7801	0	0	0	3	0	1.95	1.35	1.455
852	72	1	2	52	150	2	2	1	0	0	62.6	58.9557	61.9	3	0	0	0	0	0	0	0	0	23.1111	1.4277	0	0	0	3	0	3.08	4.13	0.831
853	58	2	1	75	162	2	1	1	1	0	95	79.4914	48.3	3	0	0	0	0	0	0	0	0	28.578	1.7953	0	0	0	4	0	1.14	0.64	0.923
854	67	2	2	70	160	3	1	1	1	0	77.6	68.7301	64.4	3	0	0	0	0	0	0	0	0	27.3438	1.7191	0	0	0	4	0	2.22	2.38	1.206
855	56	2	1	76	172	2	1	1	0	0	84.7	92.5504	65.8	3	0	0	0	0	0	0	0	0	25.6896	1.8691	0	0	0	4	0	0.75	0.53	0.403
856	65	2	1	66	170	2	3	1	0	0	119.6	50.821	50.9	3	0	0	1	0	0	0	0	0	22.8374	1.7289	0	0	0	4	0	2.69	3.86	1.554
857	68	2	1	67	169	2	2	1	0	0	61.2	96.7887	67.4	3	0	0	0	0	0	0	0	0	23.4586	1.7356	0	0	0	3	0	1.39	0.8	0.579
858	76	1	1	85	168	2	1	1	0	0	93.6	71.3661	63.1	3	0	0	0	0	0	0	0	0	30.1162	1.9599	0	1	0	3	0	1.79	0.76	1.284
859	56	2	1	75	176	2	1	1	1	0	90.3	85.6686	67.8	3	0	0	0	0	0	0	0	0	24.2123	1.8807	0	0	0	4	0	0.95	0.26	0.395
860	66	2	1	70	166	3	3	1	1	0	87.3	72.8592	69	3	0	0	0	0	0	0	0	0	25.4028	1.7557	0	0	0	3	0	2.39	3.27	1.774
861	69	2	1	75	167	2	1	0	0	0	85.3	76.6548	68	3	0	0	0	0	0	0	0	0	26.8923	1.8258	0	0	0	3	0	1.28	0.92	0.671
862	66	2	2	56	160	2	3	1	1	0	52	83.1772	60	3	0	2	0	2	0	0	0	0	21.875	1.5399	0	0	0	5	1	1.88	5.03	0.99
863	63	2	1	74	164	3	2	1	1	0	89.1	78.526	65.8	3	0	0	0	0	0	0	0	0	27.5134	1.7947	0	0	0	4	0	1.6	0.77	0.847
864	50	2	1	63	166	2	2	0	0	0	90.9	76.5928	68.7	3	0	0	0	0	0	0	0	0	22.8625	1.6661	0	0	0	6	0	0.92	0.73	0.371
865	63	2	1	75	171	3	3	0	1	1	73.7	96.2174	69.2	3	0	0	0	0	0	0	0	0	25.6489	1.8502	0	0	0	3	0	2.04	1.13	1.423
866	63	2	2	73	158	2	2	1	0	1	68.3	85.8975	63.6	3	0	0	0	0	0	0	0	0	29.2421	1.7453	0	0	0	3	0	1.51	0.57	0.655
867	70	1	1	66	172	2	1	1	1	1	83.5	67.9398	56.9	3	0	0	0	0	0	0	0	0	22.3094	1.7411	0	0	0	3	0	1.95	1.26	1.407
868	75	1	1	70	166	2	2	0	1	1	68.8	81.2067	66.9	3	0	0	0	0	0	0	0	0	25.4028	1.7557	0	0	0	3	0	2.73	0.69	0.677
869	79	1	1	77	168	2	2	0	0	0	167.3	34.4741	61.5	3	0	0	0	0	0	0	0	0	27.2817	1.8575	0	0	0	3	0	3.44	1.31	1.787
870	61	2	1	80	178	3	2	1	1	1	73.1	106.162	53.1	3	1	0	0	0	0	0	0	0	25.2493	1.9569	0	0	0	4	0	1.79	0.83	1.628
871	70	1	1	84	163	2	1	1	0	1	89.8	80.4026	58	1	0	0	1	0	0	0	0	0	31.6158	1.9166	0	1	0	3	0	1.4	0.56	1.156
872	70	1	1	60	163	4	3	1	0	1	78.7	65.5305	45.2	3	0	0	1	0	0	0	1	0	22.5827	1.6094	0	0	0	3	0	4.74	2.36	2.332
873	64	2	1	78	178	2	2	1	1	0	75	97.0545	66.4	3	0	0	0	0	0	0	0	0	24.6181	1.9313	0	0	0	4	0	1.26	0.95	0.498
874	71	1	1	68	170	2	2	1	0	1	215	26.7971	60.4	3	0	0	1	0	0	0	0	0	23.5294	1.7545	1	0	0	4	0	4.25	2.29	2.092
875	79	1	2	65	155	2	2	1	1	0	92.8	44.5947	48.6	3	0	0	0	0	0	0	0	0	27.0552	1.6246	0	0	1	3	0	5.65	4.12	3.611
876	62	2	1	70	170	1	1	1	0	0	85.9	78.0492	63.3	3	1	0	0	0	0	0	0	0	24.2215	1.7801	0	0	0	3	0	1.28	0.45	0.68
877	76	1	1	72	170	2	1	0	1	1	129.7	43.6256	65.1	3	0	0	0	0	0	0	0	0	24.9135	1.8057	0	0	0	3	0	3.76	1.42	2.726
878	71	1	1	60	163	2	2	0	0	0	121.2	41.9437	62.5	3	0	0	0	0	0	0	0	0	22.5827	1.6094	0	0	0	4	0	2.12	1.31	1.446
879	69	2	1	84	175	3	2	1	0	1	88.8	82.4695	57.1	2	0	0	1	0	0	0	0	0	27.4286	1.9898	0	0	0	3	0	1.8	1.25	1.482
880	79	1	1	70	170	2	2	1	0	1	97.3	53.887	64.4	3	0	0	0	0	0	0	0	0	24.2215	1.7801	0	0	0	3	0	2.98	1.3	1.653
881	58	2	1	68	170	2	2	1	1	1	84.8	80.7413	60.3	3	0	0	0	0	0	0	0	0	23.5294	1.7545	0	0	0	5	0	1.28	0.47	0.502
882	78	1	1	74	168	2	2	1	1	0	115.2	48.9035	66.3	3	0	0	0	0	0	0	0	0	26.2188	1.8191	0	0	0	2	0	3.5	1.01	3.079
883	52	2	1	67	174	2	2	1	1	0	107.9	67.0973	54.2	3	0	0	0	0	0	0	0	0	22.1297	1.7661	0	0	0	6	0	1.02	0.65	0.325
884	61	2	1	85	180	3	1	1	1	0	140.8	58.5615	47.5	3	0	0	1	2	0	0	0	0	26.2346	2.0331	0	0	0	4	0	1.92	0.55	0.717
885	81	1	1	69	163	2	2	0	1	0	76.1	65.6879	71.3	1	0	0	0	0	0	0	0	0	25.9701	1.7246	0	0	0	3	0	2.69	2.93	1.205
886	68	2	1	81	170	2	2	1	1	0	107.3	66.7401	56.5	3	0	0	0	0	0	0	0	0	28.0277	1.9209	0	0	0	4	0	1.43	0.3	0.779
887	61	2	1	80	179	2	2	1	0	1	62.9	123.377	68.4	3	0	0	0	0	0	0	0	0	24.968	1.963	0	0	0	5	0	1.05	0.97	0.52
888	57	2	1	88	170	1	1	1	1	1	76.5	117.238	64.4	3	0	0	0	0	0	0	0	0	30.4498	2.0105	0	1	0	3	0	0.95	0.68	0.326
889	56	2	2	64	158	2	1	1	1	1	64	87.6732	65.8	3	0	0	0	0	0	0	0	0	25.6369	1.6301	0	0	0	4	0	1.42	2.64	1.13
890	81	1	1	60	170	2	2	1	0	0	60.8	71.4938	66.3	2	0	0	0	1	0	0	0	0	20.7612	1.6521	0	0	0	2	1	3.44	1.28	1.709
891	70	1	1	66	170	2	2	0	0	1	60.9	93.1523	61.7	2	0	0	0	0	0	0	0	0	22.8374	1.7289	0	0	0	3	0	1.51	0.71	0.509
892	48	2	2	67	167	2	2	1	0	0	58.2	110.542	67.5	3	0	0	0	0	0	0	0	0	24.0238	1.7234	0	0	0	3	0	3.91	2.12	2.463
893	52	2	2	50	150	2	3	0	0	0	57.7	79.5911	60.1	2	0	0	0	0	0	0	0	0	22.2222	1.4021	0	0	0	2	0	1.6	1.09	1.083
894	63	2	2	52	150	2	2	1	0	1	68.1	61.367	53	3	0	0	1	0	0	0	0	0	23.1111	1.4277	0	0	0	3	0	3.03	1.3	1.703
895	53	2	2	51	160	3	3	0	0	0	41.6	111.323	52	1	0	2	0	0	0	0	0	0	19.9219	1.4759	0	0	0	3	1	3.17	3.46	1.175
896	75	1	1	78	160	2	2	1	0	1	102.6	60.6778	63.7	3	0	0	0	0	0	0	0	0	30.4688	1.8215	0	1	0	4	0	2.23	1.06	1.257
897	48	2	1	83	172	1	2	1	0	0	65.6	142.932	65	3	0	0	0	0	0	0	0	0	28.0557	1.9587	0	0	0	6	0	0.59	0.44	0.339
898	68	2	1	65	172	2	1	0	0	0	72.7	79.0461	66.9	3	0	0	0	0	0	0	0	0	21.9713	1.7283	0	0	0	4	0	1.03	0.44	0.592
899	56	2	1	81	173	2	2	1	0	1	68.6	121.789	67.4	2	0	0	0	0	0	0	0	0	27.0641	1.9392	0	0	0	2	0	0.75	0.53	0.459
900	66	2	1	70	165	2	2	0	1	0	110.7	57.4581	51.8	2	0	0	0	0	0	0	0	0	25.7117	1.7496	0	0	0	2	0	1.78	0.52	1.53
901	63	2	2	53	150	1	2	1	0	1	89.5	47.5917	70.4	3	0	0	0	0	0	0	0	0	23.5556	1.4405	0	0	0	4	0	2.47	0.93	0.618
902	65	2	1	61	160	2	2	1	0	0	86.4	65.0199	66.4	2	0	0	0	0	0	0	0	0	23.8281	1.6039	0	0	0	3	0	1.22	0.72	0.74
903	58	2	1	83	172	3	2	1	1	0	142.8	58.5238	40.3	2	0	0	1	0	0	0	0	0	28.0557	1.9587	0	0	0	3	0	2.21	0.77	1.094
904	75	1	1	70	170	2	2	0	0	0	72.8	76.7448	52.3	3	0	0	0	0	0	0	0	0	24.2215	1.7801	0	0	0	3	0	1.92	0.52	1.983
905	75	1	1	64	172	2	2	1	0	1	75.7	67.4786	62.9	3	0	0	0	0	0	0	0	0	21.6333	1.7155	0	0	0	4	0	2.03	1.3	0.614
906	50	2	2	43	156	2	1	1	0	0	56.3	71.7448	63.7	3	0	0	0	0	0	0	0	0	17.6693	1.3491	0	0	0	3	0	1.32	0.67	0.698
907	64	2	1	62	150	2	1	1	0	1	77.3	74.8505	64.7	3	0	0	0	0	0	0	0	0	27.5556	1.5557	0	0	0	5	0	1.66	0.51	0.905
908	49	2	1	90	175	2	2	0	1	0	60.8	165.405	68.8	1	0	0	0	0	0	0	0	0	29.3878	2.0666	0	0	0	1	0	0.6	0.89	0.314
909	77	1	1	57	172	2	2	1	0	1	79.1	55.7452	59	3	0	0	0	0	0	0	0	0	19.2672	1.6259	0	0	0	3	0	2.96	0.93	2.201
910	68	2	2	60	155	3	2	0	1	1	73.4	61.4293	64.4	2	0	0	0	0	0	0	0	0	24.974	1.5606	0	0	0	3	0	2.97	0.82	1.702
911	55	2	2	48	156	1	2	0	0	0	53	80.3475	66.1	3	0	0	0	2	0	0	0	0	19.7239	1.4131	0	0	1	5	0	1.47	0.47	0.87
912	70	1	1	61	162	1	1	1	0	1	80.7	64.9716	65.2	2	0	0	0	3	0	0	0	0	23.2434	1.6161	0	0	0	3	0	1.71	0.9	0.978
913	55	2	1	64	170	2	2	0	0	0	82.7	80.7723	63.6	3	0	0	0	0	0	0	0	0	22.1453	1.7033	0	0	0	4	0	0.95	0.27	0.36
914	68	2	1	75	173	2	2	0	0	0	100	66.3075	69.7	3	0	0	0	0	0	0	0	0	25.0593	1.8624	0	0	0	4	0	1.14	1.28	0.547
915	75	1	2	55	150	2	2	0	0	1	75	49.7511	61.2	3	0	0	0	2	0	0	0	0	24.4444	1.4661	0	0	0	4	0	3.77	2.17	3.01
916	69	2	2	67	156	2	2	1	1	1	51.2	96.973	62.7	3	0	0	0	0	0	0	0	0	27.5312	1.6563	0	0	0	4	0	1.96	1.1	2.269
917	64	2	1	63	160	2	2	1	0	0	83.9	70.0747	66.9	2	0	0	0	0	0	0	0	0	24.6094	1.6295	0	0	0	3	0	1.27	0.56	0.497
918	70	1	1	67	170	3	2	1	0	1	115.4	49.9041	46.8	3	0	0	0	0	0	1	0	0	23.1834	1.7417	0	0	0	3	0	3.64	1.54	1.882
919	77	1	2	60	160	2	1	1	0	1	58.5	67.441	69.2	3	0	0	0	0	0	0	0	0	23.4375	1.5911	0	0	0	3	0	3.17	0.5	2.066
920	67	2	1	83	174	2	1	1	0	1	115.5	64.4151	60.6	3	0	0	0	0	0	1	0	0	27.4145	1.9709	0	0	0	4	0	1.7	1.02	0.827
921	68	2	1	70	169	2	3	1	0	0	101.5	60.9724	68.4	3	0	0	0	0	0	0	0	0	24.5089	1.774	0	0	0	4	0	2.03	0.78	0.677
922	61	2	1	75	173	3	2	0	1	1	79.3	91.7453	49.1	3	0	0	0	0	0	0	0	0	25.0593	1.8624	0	0	0	4	0	1.47	0.73	0.602
923	59	2	2	60	160	2	2	1	1	0	53.9	94.1099	65.8	3	0	0	0	0	0	0	0	0	23.4375	1.5911	0	0	0	3	0	1.54	1.24	0.594
924	70	1	2	83	165	2	2	0	1	1	69.2	87.631	61.2	1	0	0	0	0	0	0	0	0	30.4867	1.916	0	1	0	1	0	1.92	0.66	1.195
925	64	2	2	62	152	2	2	1	1	0	60.4	81.4247	64	3	0	0	0	0	0	0	0	0	26.8352	1.5679	0	0	1	3	0	1.99	1.36	1.014
926	80	1	1	65	170	2	1	1	0	0	85.7	55.8795	64.7	3	0	0	0	0	0	0	0	0	22.4913	1.7161	0	0	0	4	0	2.42	1.92	1.527
927	67	2	1	67	160	2	2	0	0	0	58.9	101.965	60.7	3	0	0	1	0	0	0	0	0	26.1719	1.6807	0	0	0	4	0	1.79	1.16	1.256
928	52	2	1	68	173	2	2	1	1	1	96.1	76.4605	62.1	3	0	0	0	0	0	0	0	0	22.7204	1.7728	0	0	0	4	0	1.17	2.12	0.567
929	69	2	1	56	160	2	2	0	0	0	71.8	67.9972	64	2	0	0	0	0	0	0	0	0	21.875	1.5399	0	0	0	3	0	4.89	1.11	0.52
930	63	2	1	90	178	3	2	1	1	1	121.3	70.1522	44.5	3	0	0	1	0	0	0	0	0	28.4055	2.0849	0	0	0	4	0	2.7	2.28	1.48
931	68	2	1	75	174	4	2	0	0	0	102.2	64.8801	46.7	3	0	0	0	0	0	0	0	0	24.7721	1.8685	0	0	0	4	0	1.95	1.37	1.157
932	69	2	2	60	155	2	1	1	0	1	60.5	73.4923	62.7	3	0	0	0	0	0	0	0	0	24.974	1.5606	0	0	0	4	0	2.36	1.1	0.871
933	75	1	1	63	170	2	2	0	0	0	95.1	52.874	69.7	2	0	0	0	0	0	0	0	0	21.7993	1.6905	0	0	0	2	0	2.01	0.76	1.721
934	61	2	2	59	155	2	2	0	0	1	53.8	90.4242	62.1	3	0	0	0	0	0	0	0	0	24.5578	1.5478	0	0	0	4	0	1.6	0.57	0.85
935	70	1	2	48	157	2	2	1	1	1	65.3	53.7049	62.4	3	0	0	0	0	0	0	0	0	19.4734	1.4192	0	0	0	4	0	3.34	1.18	1.888
936	61	2	1	95	168	2	2	1	0	0	62.4	147.685	65.9	3	0	0	0	0	0	0	0	0	33.6593	2.0879	0	1	0	4	0	0.8	0.4	0.569
937	60	2	1	92	175	2	2	1	0	0	90.8	99.5316	65	3	0	0	0	0	0	0	0	0	30.0408	2.0922	0	1	0	5	0	0.76	0.36	0.291
938	73	1	1	70	173	2	1	1	0	1	100.9	57.0756	62.7	2	0	0	1	0	0	0	0	0	23.3887	1.7984	0	0	0	3	0	2.17	0.51	1.31
939	85	1	1	77	170	2	2	1	1	1	101.9	51.0327	59	2	0	0	0	0	0	0	0	0	26.6436	1.8697	0	0	0	2	0	4.14	1.32	1.695
940	78	1	1	59	166	2	1	1	1	1	109.4	41.0578	62.4	3	0	0	0	0	0	0	0	0	21.4109	1.6149	0	0	0	3	0	4.3	1.94	2.519
941	64	2	1	83	173	2	2	1	0	0	136.8	56.6206	48.1	3	0	0	0	0	0	0	0	0	27.7323	1.9648	0	0	0	4	0	1.38	0.69	1.263
942	69	2	2	60	162	3	2	1	0	1	67.9	65.4829	64.4	3	0	0	1	0	0	0	0	0	22.8624	1.6033	0	0	0	1	0	2.6	0.61	0.767
943	63	2	1	80	170	2	2	1	0	1	80.9	93.4977	49.4	3	0	0	0	0	0	0	0	0	27.6817	1.9081	0	0	0	4	0	0.91	0.95	0.609
944	64	2	1	77	171	2	2	1	0	0	102	70.4487	65.4	3	0	0	0	0	0	0	0	0	26.3329	1.8758	0	0	0	5	0	1.22	1.52	0.839
945	67	2	2	65	158	3	3	1	1	1	84.2	58.8182	65.4	3	0	0	1	0	0	0	0	0	26.0375	1.6429	0	0	0	5	0	3.8	0.93	2.491
946	78	1	1	65	162	2	1	1	0	1	70.4	70.2913	62.7	3	0	0	0	0	0	0	0	0	24.7676	1.6673	0	0	0	3	0	2.61	0.9	2
947	60	2	1	47	165	2	2	0	0	1	64.3	71.8035	64.7	3	0	1	0	0	0	0	0	0	17.2635	1.4552	0	0	0	6	1	1.32	0.85	0.695
948	44	2	1	80	176	2	2	1	0	0	63.4	148.744	69.6	1	0	0	0	0	0	0	0	0	25.8264	1.9447	0	0	0	1	0	0.55	0.38	0.276
949	75	1	2	62	156	2	1	1	0	1	91.2	46.1209	63.3	3	0	0	0	0	0	0	0	0	25.4767	1.5923	0	0	0	4	0	3.08	0.65	1.701
950	73	1	1	49	158	2	2	0	0	1	103.1	39.1004	69	3	0	0	0	0	0	0	0	0	19.6283	1.4381	0	0	0	4	0	3.48	1.78	1.797
951	61	2	1	76	175	2	2	1	0	0	170.3	43.2907	66.9	3	0	0	0	0	0	0	0	0	24.8163	1.8874	0	0	0	4	0	1.19	0.63	0.69
952	66	2	1	64	170	2	1	0	1	0	70.7	82.2548	63.3	3	0	0	0	0	0	0	0	0	22.1453	1.7033	0	0	0	5	0	1.49	1.22	0.896
953	66	2	1	88	172	2	1	1	0	1	79.9	100.078	74.9	3	0	0	0	0	0	0	0	0	29.7458	2.0227	0	0	0	4	0	1.26	1.11	0.682
954	68	2	2	50	150	2	2	1	0	1	103.1	36.4445	45.2	3	0	0	1	2	0	0	0	0	22.2222	1.4021	0	0	0	4	0	4.59	1.23	1.386
955	62	2	1	50	172	3	2	1	0	1	72.9	65.691	48.3	3	0	0	0	0	1	0	0	0	16.901	1.5363	0	0	0	4	0	2.46	0.66	1.591
956	64	2	1	60	169	2	2	1	1	1	95.7	58.5089	69.6	3	0	0	0	0	0	0	0	0	21.0077	1.646	0	0	0	5	0	1.95	0.91	1.187
957	75	1	1	87	178	3	2	0	0	0	84	82.6651	45.9	3	0	1	0	0	0	0	0	0	27.4587	2.0465	0	0	0	4	1	2.07	1.42	0.911
958	52	2	2	60	159	2	2	1	1	0	50.5	109.127	66.8	3	0	0	0	0	0	0	0	0	23.7332	1.585	0	0	0	4	0	1.29	0.92	0.702
959	75	1	1	70	168	2	2	1	1	1	73.6	75.9106	65.9	3	0	0	0	0	0	0	0	0	24.8016	1.7679	0	0	0	3	0	2.69	1.65	1.777
960	72	1	1	88	170	2	2	1	0	0	90.9	80.8345	56	3	0	0	0	0	0	0	0	1	30.4498	2.0105	0	1	0	1	0	2.84	1.08	1.443
961	71	1	1	68	172	2	2	1	1	1	162.2	35.5203	65.6	3	0	0	0	0	0	0	0	0	22.9854	1.7667	0	0	0	4	0	4.14	0.97	1.978
962	60	2	2	88	165	3	2	1	1	0	39.9	184.157	33.9	3	0	0	1	0	0	0	0	0	32.3232	1.98	0	1	0	5	0	2.34	0.49	1.327
963	60	2	2	51	155	2	3	1	0	1	90.9	46.8472	34.3	3	0	0	1	0	0	0	0	0	21.2279	1.4454	0	0	0	4	0	3.84	1.15	1.987
964	71	1	1	69	170	2	2	0	1	1	70.9	82.4557	64.8	3	0	0	0	0	0	0	0	0	23.8754	1.7673	0	0	0	5	0	1.9	0.56	0.973
965	63	2	1	60	164	3	2	1	1	1	41.1	138.029	61	3	0	0	0	0	0	0	0	0	22.3081	1.6155	0	0	0	4	0	1.97	0.99	1.365
966	72	1	1	58	165	2	2	0	1	0	79.1	61.2251	55	3	0	0	0	0	0	0	0	0	21.3039	1.596	0	0	0	4	0	2.29	1.39	1.172
967	71	1	1	69	168	2	2	0	0	1	88.7	65.9088	36.3	3	0	0	0	0	0	0	0	0	24.4473	1.7551	0	0	0	3	0	1.61	1.17	1.317
968	75	1	1	60	164	2	3	0	1	1	93.5	51.2179	64.8	3	0	0	0	0	0	0	0	0	22.3081	1.6155	0	0	0	4	0	4.57	5.59	4.995
969	49	2	1	85	176	2	2	1	0	0	91.3	104.03	65.4	3	0	0	0	0	0	0	0	0	27.4406	2.0087	0	0	0	5	0	0.69	0.57	0.379
970	61	2	1	74	176	2	2	1	0	0	102.8	69.8288	61.5	3	0	0	0	0	0	0	0	0	23.8895	1.8679	0	0	0	6	0	0.95	0.38	0.259
971	64	2	1	75	175	3	2	0	0	1	67.5	103.691	40.3	3	0	0	0	0	0	0	0	0	24.4898	1.8746	0	0	0	5	0	1.51	1.05	0.657
972	75	1	1	75	178	2	2	1	0	0	114.5	52.2803	65	3	1	0	0	0	0	0	0	0	23.6713	1.8929	0	0	0	4	0	3.14	0.76	1.864
973	75	1	1	64	169	2	2	1	0	0	91.1	56.0717	66.4	3	0	0	0	0	0	0	0	0	22.4082	1.6972	0	0	0	4	0	2.21	1.01	0.733
974	47	2	1	77	174	2	3	0	1	1	65.3	134.657	45.9	2	0	0	0	0	0	0	0	0	25.4327	1.8941	0	0	0	3	0	1.09	0.37	0.811
975	63	2	2	65	155	2	2	1	1	1	74.8	69.8378	62.4	2	0	0	0	0	0	0	0	0	27.0552	1.6246	0	0	0	2	0	1.81	0.53	0.693
976	75	1	2	70	160	3	3	1	0	1	53.3	89.0988	69.7	3	0	0	0	0	0	0	0	0	27.3438	1.7191	0	0	0	3	0	4.12	1.92	1.815
977	66	2	1	60	169	2	1	1	0	1	90.4	60.3092	68.1	3	0	0	0	0	0	0	0	0	21.0077	1.646	0	0	0	5	0	1.54	0.68	0.562
978	70	1	1	93	180	2	2	1	0	1	91.8	87.0778	64.4	3	0	0	0	0	0	0	0	0	28.7037	2.1355	0	0	0	5	0	1.53	0.63	1.464
979	65	2	1	52	168	2	2	1	0	1	97.4	49.1671	44.6	3	0	0	1	0	0	0	0	0	18.424	1.5375	0	0	0	4	0	2.73	1.82	1.463
980	65	2	1	60	165	2	2	1	0	1	90	61.3958	59.9	3	0	0	0	0	0	0	0	0	22.0386	1.6216	0	0	0	5	0	1.68	0.63	0.366
981	81	1	1	68	170	2	2	1	1	0	142.1	34.6686	67.4	3	0	0	0	0	0	0	0	0	23.5294	1.7545	0	0	0	4	0	5.07	1.73	1.83
982	56	2	1	80	170	2	2	1	1	0	80.3	102.76	60.7	3	1	0	0	0	0	0	0	0	27.6817	1.9081	0	0	0	5	0	1.28	0.49	0.79
983	68	2	1	66	170	2	2	1	0	0	61.7	94.5715	54.2	3	0	0	0	0	0	0	0	0	22.8374	1.7289	0	0	0	4	0	1.74	0.95	0.695
984	49	2	1	69	168	2	2	1	1	0	102.6	75.1471	46.7	3	0	0	0	0	0	0	0	0	24.4473	1.7551	0	0	0	6	0	1.14	0.8	0.874
985	64	2	2	67	156	2	2	1	0	1	65.8	80.77	63.3	3	0	0	0	0	0	0	0	0	27.5312	1.6563	0	0	0	5	0	1.7	0.66	0.694
986	63	2	1	72	170	2	2	1	0	0	89.1	76.4037	64.4	3	0	0	0	0	0	0	0	0	24.9135	1.8057	0	0	0	5	0	1.1	0.42	0.588
987	68	2	1	70	176	2	3	1	0	1	91.8	67.415	48.9	3	0	0	1	0	0	1	0	0	22.5981	1.8167	0	0	0	4	0	3.25	0.91	1.649
988	81	1	1	57	168	2	3	1	0	0	145.6	28.3618	61.9	3	1	0	0	0	0	0	0	0	20.1956	1.6015	0	0	1	4	0	5.76	4.1	5.966
989	56	2	1	70	160	2	2	0	1	0	74.8	96.5261	66.9	3	0	0	0	0	0	0	0	0	27.3438	1.7191	0	0	0	5	0	1.16	0.66	0.864
990	56	2	1	65	169	2	2	1	1	1	112.7	59.4891	66.4	3	0	0	0	0	0	0	0	0	22.7583	1.71	0	0	0	5	0	1.39	0.64	0.474
991	52	2	1	90	172	3	2	0	1	0	86.4	112.559	42.3	2	0	0	0	0	0	0	0	0	30.4218	2.0483	0	1	0	3	0	0.95	1.17	0.407
992	78	1	1	77	167	3	1	1	0	1	76.6	76.5284	61.7	3	0	0	0	0	0	0	0	0	27.6095	1.8514	0	0	0	4	0	2.52	0.5	1.171
993	70	1	2	72	163	2	1	1	1	1	94.3	55.7836	68.5	3	0	0	0	0	0	0	0	0	27.0993	1.763	0	0	0	1	0	1.51	1.06	0.863
994	67	2	1	67	170	2	2	0	0	1	177.8	33.7781	60	3	0	0	0	0	0	0	0	0	23.1834	1.7417	1	0	0	4	0	2.54	0.94	1.114
995	67	2	1	77	173	2	2	0	0	1	82	84.1722	64.7	3	0	0	0	0	0	0	0	0	25.7276	1.888	0	0	0	5	0	1.35	0.35	0.487
996	66	2	1	90	175	3	2	1	1	1	72.9	112.18	66.3	3	0	0	0	0	0	0	0	0	29.3878	2.0666	0	0	0	5	0	1.71	1.42	0.915
997	65	2	2	70	155	2	2	1	0	1	81.1	67.5657	65	3	0	0	0	0	0	0	0	0	29.1363	1.6886	0	0	0	5	0	1.79	0.5	1.341
998	51	2	1	62	170	2	1	0	0	0	73.4	92.3112	62.7	3	0	0	0	0	0	0	0	0	21.4533	1.6777	0	0	0	5	0	0.78	0.42	0.904
999	70	1	1	55	164	3	1	1	0	1	99.4	47.5602	68	3	0	0	0	0	0	0	0	0	20.4491	1.5515	0	0	0	3	0	2.83	1.95	2.023
1000	55	2	1	60	158	2	2	1	0	1	109.1	57.4003	64.4	3	0	0	0	0	0	0	0	0	24.0346	1.5789	0	0	0	6	0	1.49	0.56	0.496
1001	72	1	1	56	160	2	2	0	0	1	77.8	60.1016	65.6	3	0	0	0	0	0	0	0	0	21.875	1.5399	0	0	0	5	0	2.66	0.59	0.956
1002	67	2	1	82	173	2	2	1	0	1	153.2	47.9785	56.3	3	0	0	0	0	0	0	0	0	27.3982	1.952	0	0	0	4	0	2.06	1.2	1.789
1003	53	2	1	79	170	2	1	1	1	1	86.5	97.5661	63.7	3	0	0	0	0	0	0	0	0	27.3356	1.8953	0	0	0	6	0	0.95	0.37	0.614
1004	70	1	1	58	173	2	1	1	0	1	61.3	81.3269	66.3	3	0	0	0	0	0	0	0	0	19.3792	1.6448	0	0	0	4	0	1.74	3.19	2.469
1005	64	2	1	77	169	2	1	1	0	1	82	87.6313	65.4	2	0	0	0	0	0	0	0	0	26.9598	1.8636	0	0	0	3	0	0.95	1.18	0.584
1006	62	2	1	63	168	2	1	1	0	1	64.9	92.9735	72	3	0	0	0	0	0	0	0	0	22.3214	1.6783	0	0	0	5	0	1.18	0.23	0.324
1007	68	2	1	69	168	2	2	0	1	1	80.4	75.8743	68.5	3	0	0	0	0	0	0	0	0	24.4473	1.7551	0	0	0	4	0	1.94	0.96	1.776
1008	69	2	1	73	170	2	3	0	0	1	84.4	75.4063	71.9	3	0	0	0	0	0	0	0	0	25.2595	1.8185	0	0	0	4	0	1.98	4.2	0.884
1009	60	2	2	67	164	2	1	1	0	1	64.6	86.6004	67.9	3	0	0	0	0	0	0	0	0	24.9108	1.7051	0	0	0	4	0	1.22	0.77	0.824
1010	53	2	1	82	176	2	2	1	1	1	78.4	111.734	62.7	3	0	0	0	0	0	0	0	0	26.4721	1.9703	0	0	0	4	0	0.95	0.62	0.378
1011	52	2	1	65	170	3	3	1	0	1	84.8	82.8265	50.5	2	0	0	0	0	0	0	1	0	22.4913	1.7161	0	0	0	3	0	1.23	1.62	0.956
1012	58	2	1	75	170	2	2	1	0	0	59.6	126.706	60.9	3	0	0	0	0	0	0	0	0	25.9516	1.8441	0	0	0	3	0	0.83	4.28	0.406
1013	66	2	1	69	160	2	2	0	0	1	69	90.8658	61.9	3	0	0	0	0	0	0	0	0	26.9531	1.7063	0	0	0	4	0	1.51	1.52	0.423
1014	59	2	1	89	183	2	1	0	0	0	84.9	104.264	68.4	3	0	1	0	0	0	0	0	0	26.5759	2.1026	0	0	0	5	1	0.75	0.41	0.293
1015	60	2	1	100	175	2	1	0	0	0	76.1	129.085	54.4	3	0	0	0	0	0	0	0	0	32.6531	2.1946	0	1	0	3	0	0.95	0.39	0.321
1016	79	1	1	81	164	2	1	1	0	0	120.2	50.4753	47.7	3	0	0	0	0	0	0	0	0	30.116	1.8843	0	1	0	4	0	2.91	0.8	1.479
1017	78	1	1	73	168	2	2	1	0	1	101.6	54.7003	65.4	3	0	0	1	0	0	0	0	0	25.8645	1.8063	0	0	0	5	0	3.48	1.2	2.326
1018	73	1	1	78	173	2	2	1	1	1	131	48.9854	64	3	0	0	0	0	0	0	0	0	26.0617	1.9008	0	0	0	5	0	3.38	1.5	2.122
1019	62	2	1	72	167	2	2	0	0	1	86.1	80.0927	64.7	3	0	0	0	0	0	0	0	0	25.8166	1.7874	0	0	0	5	0	1.18	0.96	1.105
1020	60	2	1	89	170	2	3	1	0	1	96.7	90.4112	62.4	3	0	0	0	0	0	0	0	0	30.7958	2.0233	0	1	0	5	0	1.28	0.63	0.415
1021	65	2	1	70	170	2	2	1	0	1	93.2	69.1691	62.4	3	0	0	0	0	0	0	0	0	24.2215	1.7801	0	0	0	5	0	1.39	0.67	0.961
1022	69	2	1	55	170	3	2	0	0	1	95.6	50.1571	35.1	3	1	0	1	0	0	0	0	0	19.0311	1.5881	0	0	0	5	0	5.15	1.25	4.005
1023	66	2	1	80	175	2	2	1	1	0	68.9	105.505	54	3	0	0	0	0	0	0	0	0	26.1224	1.9386	0	0	0	6	0	1.35	0.46	0.447
1024	72	1	1	71	176	2	2	1	0	1	107.5	55.1477	60	3	0	0	0	0	0	0	0	0	22.921	1.8295	0	0	0	4	0	2.13	1.34	0.76
1025	58	2	1	68	167	3	3	0	1	1	106.5	64.2898	59.8	3	0	0	1	0	0	0	0	0	24.3824	1.7362	0	0	0	4	0	2.91	1.15	2.228
1026	65	2	1	55	158	2	3	0	1	1	102.1	49.6098	68	3	0	0	0	0	0	0	0	0	22.0317	1.5149	0	0	0	5	0	3.28	0.58	1.542
1027	69	2	2	74	164	2	2	1	0	0	123.5	44.4029	67.4	3	0	0	0	0	0	0	0	0	27.5134	1.7947	0	0	0	5	0	2.52	1.01	1.23
1028	77	1	1	68	170	2	2	0	1	0	80.8	65.1039	60	3	0	0	0	0	0	0	0	0	23.5294	1.7545	0	0	0	1	0	2.74	0.74	1.414
1029	73	1	1	73	164	2	2	1	0	0	89	67.4802	66.4	3	0	0	0	0	0	0	0	0	27.1416	1.7819	0	0	0	4	0	1.81	0.91	0.487
1030	69	2	1	85	172	2	2	1	0	0	96.6	76.713	65.4	2	0	0	0	0	0	0	0	0	28.7317	1.9843	0	0	0	3	0	1.26	0.65	1.295
1031	63	2	1	86	178	2	2	0	0	1	98.9	82.217	67.5	3	0	0	0	0	0	0	0	0	27.143	2.0337	0	0	0	5	0	1.19	0.53	0.734
1032	63	2	1	80	178	2	2	1	0	0	90.7	83.3954	69.7	3	0	0	0	0	0	0	0	0	25.2493	1.9569	0	0	0	5	0	1	0.47	0.469
1033	66	2	2	55	150	2	2	1	1	1	83.8	50.6919	65.6	3	0	0	0	0	0	0	0	0	24.4444	1.4661	0	0	0	4	0	3.06	0.85	0.723
1034	57	2	2	56	169	2	3	0	0	0	83.7	57.96	52.2	3	0	0	0	0	0	0	0	0	19.6072	1.5948	0	0	0	4	0	1.59	0.84	0.611
1035	63	2	2	60	155	2	2	1	1	0	75.6	63.7834	63.7	3	0	0	0	0	0	0	0	0	24.974	1.5606	0	0	0	4	0	1.95	1.4	1.158
1036	60	2	1	75	170	2	3	0	0	0	76.1	96.8134	49.1	3	1	0	0	0	0	0	0	0	25.9516	1.8441	0	0	0	5	0	1.28	0.87	0.327
1037	65	2	1	75	170	2	3	1	0	0	110.3	62.6204	60.1	3	1	0	0	0	0	0	0	0	25.9516	1.8441	0	0	0	5	0	2.49	1.15	2.323
1038	66	2	1	64	150	2	2	0	0	0	72.1	80.6576	62.1	3	1	0	0	0	0	0	0	0	28.4444	1.5813	0	0	0	4	0	2.75	0.77	2.185
1039	67	2	2	55	150	3	2	1	0	0	83.4	50.2467	42.5	3	0	0	1	0	0	0	1	0	24.4444	1.4661	0	0	0	5	0	4.13	1.47	1.65
1040	76	1	1	81	172	2	2	1	0	0	108.4	58.7225	65.4	3	0	0	0	0	0	0	0	0	27.3797	1.9331	0	0	0	4	0	3.4	0.83	2.183
1041	56	2	1	70	170	2	2	0	0	0	68.8	104.944	60.7	3	0	0	0	0	0	0	0	0	24.2215	1.7801	0	0	0	5	0	0.86	0.57	0.508
1042	80	1	1	92	175	2	3	1	1	0	97.7	69.3767	65.2	2	0	0	0	0	1	0	0	0	30.0408	2.0922	0	1	0	2	0	4.46	2.08	2.119
1043	64	2	1	64	170	2	2	1	0	0	76.7	77.8694	56	3	1	0	0	0	0	0	0	0	22.1453	1.7033	0	0	0	4	0	1.02	1.07	0.419
1044	67	2	2	62	158	2	3	1	0	0	52	90.8446	68.7	3	0	0	0	0	0	0	0	0	24.8358	1.6045	0	0	0	4	0	2.54	1.06	1.448
1045	67	2	2	76	165	2	2	1	0	0	67.8	85.4072	69.7	3	0	0	0	0	0	0	1	0	27.9155	1.8264	0	0	0	5	0	2.26	0.46	1.479
1046	57	2	2	58	155	2	2	0	1	0	62	81.0405	65.6	3	0	0	0	0	0	0	0	0	24.1415	1.535	0	0	0	5	0	1.39	0.68	0.572
1047	81	1	1	80	170	2	2	1	0	0	121.2	47.8199	50.9	3	0	0	1	0	0	0	0	0	27.6817	1.9081	0	0	0	4	0	5.75	3.26	3.016
1048	81	1	2	81	158	3	3	1	0	0	73.5	67.8637	63.7	2	0	0	0	0	0	0	0	0	32.4467	1.8477	0	1	0	2	0	5.77	1.3	3.327
1049	56	2	1	80	175	4	3	0	1	0	363.5	22.7004	35.4	3	0	2	1	1	0	0	1	0	26.1224	1.9386	1	0	1	4	1	19.16	58.97	5.325
1050	65	2	1	80	163	2	2	1	0	0	78.5	93.8535	63	3	0	0	0	0	0	0	0	0	30.1103	1.8654	0	1	0	3	0	1.45	1.05	0.807
1051	71	1	1	70	163	2	2	1	0	0	82.2	72.1513	64.4	3	0	0	0	0	0	0	0	0	26.3465	1.7374	0	0	0	4	0	1.73	0.57	0.739
1052	61	2	1	66	171	2	2	1	0	0	76.6	83.5817	64	3	0	0	0	0	0	0	0	0	22.571	1.735	0	0	0	4	0	1.03	0.46	0.758
1053	74	1	1	75	170	2	2	1	0	0	80.4	75.5993	65.8	3	0	0	0	0	0	0	0	0	25.9516	1.8441	0	0	0	3	0	1.78	0.55	0.924
1054	66	2	2	50	155	2	3	0	0	0	87.7	44.0342	57.1	3	0	0	0	0	0	0	0	0	20.8117	1.4326	0	0	1	4	0	3.01	1.83	1.592
1055	57	2	1	75	167	2	3	1	0	1	88.8	86.0786	42.5	3	0	0	1	0	0	0	1	0	26.8923	1.8258	0	0	0	4	0	1.73	0.61	1.444
1056	65	2	1	60	160	2	1	1	0	1	59.6	92.7118	60.9	1	0	0	0	0	0	0	0	0	23.4375	1.5911	0	0	0	1	0	1.21	0.44	0.395
1057	52	2	2	65	160	2	2	1	1	0	58	102.933	52.2	3	0	0	1	0	0	0	0	0	25.3906	1.6551	0	0	0	5	0	1.52	0.87	0.76
1058	65	2	1	75	175	2	2	1	1	0	66.8	103.399	61.5	3	0	0	0	0	0	0	0	0	24.4898	1.8746	0	0	0	4	0	1.28	0.76	1.016
1059	69	2	1	76	174	3	2	1	0	0	88	75.2936	61.7	3	0	0	0	0	0	0	0	0	25.1024	1.8813	0	0	0	5	0	1.88	0.41	1.162
1060	73	1	1	92	182	2	3	1	1	1	89.4	84.6631	62.4	3	0	0	0	0	0	0	0	0	27.7744	2.1349	0	0	0	5	0	2.77	1.57	1.299
1061	68	2	1	75	165	2	2	1	0	0	84.5	78.4704	63	3	0	0	0	0	0	0	0	0	27.5482	1.8136	0	0	0	3	0	1.36	0.58	0.762
1062	83	1	1	72	170	2	1	1	0	0	68	74.1084	65.4	3	0	0	1	0	0	0	0	0	24.9135	1.8057	0	0	0	4	0	3.46	0.8	1.329
1063	76	1	1	63	158	3	2	1	1	1	88.7	55.8169	69	3	0	0	0	0	0	0	1	0	25.2363	1.6173	0	0	0	4	0	2.98	6.44	8.395
1064	68	2	1	60	165	2	1	0	0	0	96.9	54.743	65.2	3	0	0	0	0	0	0	0	0	22.0386	1.6216	0	0	0	5	0	1.72	0.99	0.729
1065	83	1	2	43	150	3	3	0	0	0	77	33.2231	63.3	3	0	0	0	0	0	0	0	0	19.1111	1.3125	0	0	0	3	0	5.54	2.85	3.681
1066	57	2	1	84	180	3	2	1	0	0	78.1	109.616	63.7	2	0	0	0	0	0	0	0	0	25.9259	2.0203	0	0	0	2	0	0.76	0.3	0.207
1067	65	2	1	71	165	3	3	1	0	0	92.2	70.9182	52.2	3	0	0	0	0	0	0	0	0	26.079	1.7624	0	0	0	4	0	1.68	0.47	0.678
1068	68	2	1	62	160	2	3	0	0	0	71.3	76.8783	63.3	3	0	0	0	0	0	0	0	0	24.2188	1.6167	0	0	0	5	0	2.48	3.55	2.748
1069	62	2	1	68	172	2	2	0	0	0	90.1	72.2849	60	3	0	0	0	0	0	0	0	0	22.9854	1.7667	0	0	0	3	0	1.1	0.33	0.375
1070	70	1	1	73	168	2	2	1	0	0	90.4	69.4099	65.9	3	0	0	0	0	0	0	0	0	25.8645	1.8063	0	0	0	3	0	1.55	0.5	0.865
1071	71	1	2	75	155	4	3	1	0	0	208.9	25.8559	30.6	3	0	2	0	1	0	0	0	0	31.2175	1.7526	1	1	1	5	1	25.25	53.25	2.203
1072	57	2	1	63	173	2	1	1	1	0	769.5	8.34409	56.3	3	0	0	0	0	0	0	0	0	21.0498	1.7088	1	0	0	4	0	1.13	1.5	0.591
1073	74	1	2	79	165	3	2	1	0	1	70.4	77.3012	65.2	3	0	0	0	0	0	0	0	0	29.0174	1.8648	0	0	0	3	0	3.65	0.78	5.39
1074	49	2	1	96	180	2	3	0	0	0	87.3	122.876	59.8	3	0	0	1	0	0	0	1	0	29.6296	2.1739	0	0	0	6	0	1.03	1.05	0.53
1075	65	2	2	98	163	3	2	1	1	1	62.5	122.743	57.1	3	0	0	1	0	0	0	0	0	36.8851	2.0958	0	1	0	5	0	2.59	0.6	0.52
1076	66	2	1	78	165	2	2	1	0	0	82.6	85.8055	68.4	3	0	0	0	0	0	0	0	0	28.6501	1.852	0	0	0	4	0	1.56	2.13	0.494
1077	78	1	1	54	160	2	2	1	0	0	76.7	53.5993	69	3	0	0	0	0	0	0	1	0	21.0938	1.5143	0	0	0	4	0	3.42	0.38	1.529
1078	68	2	2	79	160	3	1	1	0	1	71.1	83.4983	61.7	1	0	0	0	0	0	0	0	0	30.8594	1.8343	0	1	0	1	0	1.21	0.43	0.859
1079	68	2	1	55	165	3	2	1	0	0	76.2	63.813	62	3	0	0	0	0	0	0	0	0	20.202	1.5576	0	0	0	5	0	2.18	1.92	0.907
1080	47	2	1	70	170	2	2	0	0	0	78	102.484	63.7	3	0	0	0	0	0	0	0	0	24.2215	1.7801	0	0	0	5	0	0.69	0.73	0.299
1081	59	2	1	83	172	2	2	1	0	1	81.2	101.666	65.4	3	0	0	0	0	0	0	0	0	28.0557	1.9587	0	0	0	5	0	1.16	0.82	0.531
1082	75	1	1	79	165	2	2	1	0	0	85.6	73.6607	63.4	3	0	0	1	0	0	0	0	0	29.0174	1.8648	0	0	0	4	0	2.1	0.8	1.129
1083	75	1	2	62	156	3	1	1	0	0	98.8	42.5732	65.4	3	0	0	0	0	0	0	0	0	25.4767	1.5923	0	0	0	4	0	4.24	3.73	2.99
1084	77	1	2	70	178	3	3	0	0	0	84.9	54.2149	58.8	3	0	0	0	0	0	0	0	0	22.0932	1.8289	0	0	0	4	0	1.7	0.95	0.824
1085	82	1	1	95	178	2	2	1	1	0	67.3	100.532	59.8	3	0	0	1	0	0	0	1	0	29.9836	2.1489	0	0	0	4	0	3.6	5.66	3.41
1086	78	1	1	71	178	3	2	1	1	0	372.8	14.4992	69	3	0	0	0	0	1	0	0	0	22.4088	1.8417	1	0	0	3	0	5.8	1.21	2.63
1087	74	1	2	59	167	3	2	1	1	1	74.8	54.3353	65.8	3	0	0	0	0	0	0	0	0	21.1553	1.621	0	0	0	5	0	2.27	0.79	0.974
1088	75	1	1	62	168	3	2	0	1	0	86.7	57.0762	61.7	3	0	0	0	0	0	0	0	0	21.9671	1.6655	0	0	0	5	0	1.81	1.38	0.993
1089	62	2	1	64	170	2	1	1	0	0	80.6	76.0516	64	3	0	0	0	0	0	0	0	0	22.1453	1.7033	0	0	0	4	0	1.02	0.66	0.422
1090	66	2	1	75	161	2	1	1	0	1	140.9	48.3672	67.9	3	0	0	0	0	0	0	0	0	28.9341	1.7892	0	0	0	4	0	1.75	0.58	1.128
1091	70	1	2	68	167	2	1	1	0	0	104.7	47.4513	63	3	0	0	0	0	0	0	1	0	24.3824	1.7362	0	0	0	3	0	1.84	0.72	0.854
1092	56	2	1	95	174	2	2	1	0	0	77.7	126.11	62.7	3	0	0	0	0	0	0	0	0	31.378	2.1245	0	1	0	5	0	0.62	0.43	0.231
1093	77	1	1	83	179	2	1	1	1	0	98.6	65.1194	63.7	1	0	0	0	0	0	0	0	0	25.9043	2.0014	0	0	0	1	0	1.33	0.74	0.718
1094	64	2	1	58	171	2	3	1	1	0	84.5	64.0551	60.9	3	0	0	0	0	0	0	0	0	19.8352	1.6326	0	0	0	4	0	2.12	0.82	1.238
1095	55	2	1	55	170	2	1	1	0	0	58.4	98.2964	63	3	0	0	1	0	0	0	0	0	19.0311	1.5881	0	0	0	5	0	1.21	0.44	0.383
1096	63	2	1	80	175	2	1	0	0	0	99.2	76.2497	51.3	3	0	0	0	0	0	0	0	0	26.1224	1.9386	0	0	0	4	0	1.11	0.54	0.712
1097	63	2	2	80	160	3	1	1	0	0	64.6	99.5259	63.3	3	0	0	0	0	0	0	0	0	31.25	1.8471	0	1	0	3	0	1.92	0.83	1.161
1098	70	1	1	85	175	2	1	1	0	0	63	115.97	60.7	3	0	0	0	0	0	0	0	0	27.7551	2.0026	0	0	0	3	0	1.47	0.75	1.863
1099	70	1	1	70	163	4	3	1	0	0	83.1	72.4042	55	3	0	2	0	1	0	0	0	0	26.3465	1.7374	0	0	1	3	1	9.94	10.05	4.039
1100	38	2	1	78	176	3	2	1	1	0	61.6	158.593	65	1	0	0	0	0	0	0	0	0	25.1808	1.9191	0	0	0	3	0	0.57	0.35	0.319
1101	77	1	1	70	178	3	3	0	0	0	84.9	63.7822	58.8	3	0	0	0	0	0	0	0	0	22.0932	1.8289	0	0	0	4	0	1.7	0.97	1.605
1102	71	1	1	70	172	3	3	1	1	0	108.8	54.5114	63.3	3	0	0	0	0	0	0	0	0	23.6614	1.7923	0	0	0	4	0	1.59	0.5	0.678
1103	70	1	2	62	160	2	3	1	0	0	72.5	62.4798	65.8	2	0	0	0	0	0	0	0	0	24.2188	1.6167	0	0	0	2	0	1.51	0.59	0.625
1104	72	1	2	61	160	2	2	1	1	1	120.9	35.8097	70.4	3	0	0	0	0	0	0	0	0	23.8281	1.6039	0	0	0	5	0	2.61	1.08	1.896
1105	66	2	1	75	160	2	1	1	0	0	63.9	106.65	61	3	0	0	0	0	0	0	0	0	29.2969	1.7831	0	0	0	4	0	1.03	0.55	0.407
1106	69	2	2	59	160	2	2	1	0	1	78.1	55.9818	63.6	3	0	0	0	0	0	1	0	0	23.0469	1.5783	0	0	0	5	0	2.4	0.82	1.443
1107	57	2	2	61	162	2	2	1	0	0	40.5	130.479	70.4	3	0	0	0	0	0	0	0	0	23.2434	1.6161	0	0	0	5	0	0.95	0.46	0.287
1108	71	1	2	79	170	2	2	1	0	0	57.3	99.2909	61	3	0	0	0	0	0	0	0	0	27.3356	1.8953	0	0	0	5	0	1.52	1.28	0.845
1109	64	2	1	82	178	3	2	1	1	1	72.7	105.26	55.1	3	0	0	0	0	0	0	0	0	25.8806	1.9825	0	0	0	5	0	1.21	0.46	0.514
1110	65	2	2	79	163	2	1	0	0	0	54.5	113.47	60.7	3	0	0	0	0	0	0	0	0	29.7339	1.8526	0	0	0	6	0	1.17	0.57	0.698
1111	72	1	1	81	168	3	2	1	0	0	81.1	83.3954	66.4	3	0	0	1	0	0	0	0	0	28.699	1.9087	0	0	0	4	0	1.28	0.54	0.395
1112	59	2	1	53	163	1	3	0	1	0	91.9	57.3607	66.4	3	0	0	0	0	0	0	0	0	19.9481	1.5198	0	0	0	5	0	1.18	1.2	1.108
1113	73	1	1	56	176	1	2	1	1	0	90.8	50.7395	60	3	0	0	0	0	0	0	0	0	18.0785	1.6375	0	0	0	5	0	1.78	0.86	1.044
1114	73	1	1	60	164	2	2	0	0	0	79.1	62.4049	64	3	0	0	0	0	0	0	0	0	22.3081	1.6155	0	0	0	5	0	1.79	0.78	0.93
1115	58	2	2	73	155	2	2	1	1	0	61.7	101.26	65.4	3	0	0	0	0	0	0	0	0	30.385	1.727	0	1	0	8	0	0.95	0.46	0.245
1116	47	2	1	80	178	1	3	1	0	0	78.7	116.083	64	3	0	0	0	0	0	0	0	0	25.2493	1.9569	0	0	0	6	0	0.55	0.55	0.352
1117	57	2	1	70	168	2	2	1	0	1	112.9	63.1904	64	3	0	0	0	0	0	0	0	0	24.8016	1.7679	0	0	0	7	0	1.02	0.87	0.922
1118	62	2	1	67	182	2	1	0	0	0	100	64.1709	69.7	3	0	0	0	0	0	0	0	0	20.227	1.8149	0	0	0	5	0	0.94	1.35	0.454
1119	59	2	1	63	167	1	2	1	0	0	83	75.4947	64.4	3	0	0	0	0	0	0	0	0	22.5896	1.6722	0	0	0	5	0	0.76	0.4	0.284
1120	80	1	1	60	173	2	2	1	0	0	79.4	55.6738	66.9	1	0	0	1	0	0	0	0	0	20.0474	1.6704	0	0	0	3	0	1.78	0.74	0.712
1121	76	1	1	49	170	2	1	1	0	0	72.2	53.3344	57.9	3	0	0	1	0	0	0	0	0	16.955	1.5113	0	0	0	6	0	2.45	0.6	1.14
1122	60	2	1	75	170	1	3	1	0	0	82.7	89.0871	57.1	3	0	0	0	0	0	1	0	0	25.9516	1.8441	0	0	0	5	0	0.95	0.43	0.461
1123	75	1	1	69	172	1	2	1	1	0	76.6	71.8956	57.1	3	0	0	0	0	0	0	0	0	23.3234	1.7795	0	0	0	5	0	1.6	0.57	1.173
1124	65	2	1	69	168	2	1	1	1	0	87.3	72.7889	65.4	3	0	0	0	0	0	0	0	0	24.4473	1.7551	0	0	0	6	0	1.03	0.67	0.515
1125	50	2	1	48.5	163	1	2	1	0	1	64.7	82.8417	38.6	3	0	0	0	0	0	0	0	0	18.2544	1.4622	0	0	0	6	0	1.28	0.55	0.457
1126	59	2	1	65	169	1	1	0	1	0	63.2	102.294	64.4	3	0	0	0	0	0	0	0	0	22.7583	1.71	0	0	0	5	0	0.71	0.51	0.358
1127	76	1	1	68.5	169	3	1	0	0	0	122.2	44.0523	51.3	3	0	0	0	0	0	0	0	0	23.9838	1.7548	0	0	0	5	0	2.33	0.68	1.189
1128	59	2	1	68	170	2	2	0	1	0	68.1	99.3152	63.1	3	1	0	0	0	0	0	0	0	23.5294	1.7545	0	0	0	4	0	1	0.57	0.456
1129	60	2	1	74	170	2	2	1	0	0	76.5	95.0231	62.4	1	0	0	0	0	0	0	0	0	25.6055	1.8313	0	0	0	1	0	0.59	0.71	0.418
1130	58	2	2	60	153	2	2	1	1	0	43.9	116.974	62.1	1	0	0	0	2	0	0	0	0	25.6312	1.5484	0	0	0	2	0	0.85	0.36	0.335
1131	60	2	1	70	172	2	3	0	0	0	70.9	96.9864	54.4	3	0	0	0	0	0	0	0	0	23.6614	1.7923	0	0	0	5	0	0.76	0.4	0.34
1132	68	2	1	62	167	3	3	1	1	1	67.7	80.9663	54	3	0	0	0	0	0	0	0	0	22.231	1.6594	0	0	0	6	0	1.42	0.64	1.414
1133	68	2	1	70	167	3	1	1	0	0	81.5	75.935	55.3	3	0	0	1	0	0	0	0	0	25.0995	1.7618	0	0	0	5	0	1.19	0.51	1.006
1134	62	2	1	63	162	2	1	1	0	0	62.1	97.1656	65.4	3	0	0	0	0	0	0	0	0	24.0055	1.6417	0	0	0	5	0	0.78	0.33	0.216
1135	64	2	1	93.5	172	3	1	1	1	0	90.2	96.7359	62.7	2	0	0	0	0	0	0	0	0	31.6049	2.0931	0	1	0	2	0	0.76	0.36	0.23
1136	55	2	1	71	163	2	1	1	0	0	82.9	89.3906	66.9	3	0	0	0	0	0	0	0	0	26.7229	1.7502	0	0	0	5	0	0.73	0.73	0.371
1137	58	2	1	67	168	2	1	1	1	0	76.2	88.5325	67.5	3	0	0	0	0	0	0	0	0	23.7387	1.7295	0	0	0	5	0	0.69	1.71	0.354
1138	71	1	2	48	155	3	2	1	0	0	54.6	63.3119	66.8	3	1	0	0	0	0	0	0	0	19.9792	1.407	0	0	0	5	0	3.23	0.88	1.581
1139	69	2	2	60	158	2	2	1	1	0	58.3	76.2656	66.3	3	0	0	0	0	0	0	0	0	24.0346	1.5789	0	0	0	7	0	1.7	0.9	0.829
1140	60	2	1	83	170	2	2	1	1	0	69.6	117.146	63	3	0	0	0	0	0	0	0	0	28.7197	1.9465	0	0	0	5	0	0.62	0.66	0.203
1141	68	2	1	57	170	2	1	1	0	0	65.2	77.291	63	3	0	0	0	0	0	0	0	0	19.7232	1.6137	0	0	0	4	0	1.21	0.53	0.815
1142	71	1	2	47	160	2	1	0	0	0	77.9	43.4508	64	2	0	0	0	0	0	0	0	0	18.3594	1.4247	0	0	0	3	0	2.06	0.97	1.521
1143	70	1	1	55	173	3	1	1	1	0	327.6	14.4306	62.7	3	0	0	0	0	0	0	0	0	18.3768	1.6064	1	0	0	3	0	4.13	1.8	2.954
1144	57	2	1	75	172	2	2	1	1	0	76.1	100.444	61	1	0	0	0	0	0	0	0	0	25.3515	1.8563	0	0	0	1	0	0.55	0.46	0.313
1145	71	1	1	59	173	2	1	0	1	0	63.7	78.4749	64.7	3	0	0	0	0	0	0	0	0	19.7133	1.6576	0	0	0	3	0	1.46	0.54	0.536
1146	74	1	2	59	159	3	2	1	1	0	53.1	76.5401	64.8	3	0	0	0	0	0	0	0	0	23.3377	1.5722	0	0	0	5	0	2.15	0.53	1.149
1147	73	1	1	70	172	3	2	1	0	0	71	81.1117	61.9	3	0	0	0	0	0	0	0	0	23.6614	1.7923	0	0	0	4	0	1.26	0.66	0.811
1148	66	2	1	80	170	1	1	1	1	0	54	134.616	64.7	3	1	0	0	0	1	0	0	0	27.6817	1.9081	0	0	0	4	0	1.56	0.46	1.21
1149	65	2	1	65	162	2	1	1	0	0	74.9	79.9211	61.9	3	0	0	0	0	0	0	0	0	24.7676	1.6673	0	0	0	4	0	1.14	0.85	0.563
1150	70	1	1	70	172	3	1	1	1	0	71.3	84.387	66.9	3	0	0	0	0	0	0	0	0	23.6614	1.7923	0	0	0	5	0	1.25	0.66	0.45
1151	74	1	2	68	158	3	2	1	1	0	59.9	78.2013	69.7	3	0	0	0	0	0	0	0	0	27.2392	1.6813	0	0	0	6	0	1.95	1.07	0.913
1152	58	2	1	60	169	2	3	1	0	0	72.5	83.329	65.5	3	0	0	0	0	0	0	0	0	21.0077	1.646	0	0	0	5	0	0.76	0.45	0.245
1153	79	1	2	57	154	4	2	1	0	0	177.5	20.4453	50	3	0	1	0	0	0	0	0	0	24.0344	1.5161	1	0	0	5	1	6.44	4.11	3.214
1154	50	2	2	71	160	2	3	1	1	0	71.3	93.5404	63.6	3	0	0	0	0	0	0	0	0	27.7344	1.7319	0	0	0	5	0	0.78	0.62	0.335
1155	68	2	1	69	158	2	1	1	1	1	85.4	71.432	61	1	0	0	0	0	0	0	0	0	27.6398	1.6941	0	0	0	2	0	1.15	0.89	0.961
1156	44	2	1	70	165	3	3	1	0	0	53.3	154.814	55	3	0	2	0	0	0	0	0	0	25.7117	1.7496	0	0	0	5	1	1.36	2.8	0.69
1157	69	2	1	58	164	3	2	0	0	1	57.8	87.4838	62.4	2	0	0	0	0	0	0	0	0	21.5645	1.5899	0	0	0	3	0	1.43	0.67	0.629
1158	61	2	1	75	168	3	2	0	0	0	88.1	82.5812	60.9	3	0	0	0	0	0	0	0	0	26.5731	1.8319	0	0	0	5	0	0.7	0.95	0.348
1159	46	2	1	80	172	3	3	1	0	0	64.9	142.279	63.4	3	0	0	0	0	0	0	0	0	27.0416	1.9203	0	0	0	5	0	0.55	0.56	0.232
1160	61	2	1	70	167	2	2	1	0	0	67.3	100.897	63	3	0	0	0	0	0	0	0	0	25.0995	1.7618	0	0	0	5	0	0.83	0.36	0.468
1161	73	1	1	64	170	3	2	1	1	0	98.8	53.2926	60.1	3	0	0	1	0	0	1	0	0	22.1453	1.7033	0	0	0	4	0	2.25	0.4	0.732
1162	49	2	2	70	162	3	2	1	1	0	43.1	154.259	60.9	3	0	0	0	0	0	0	0	0	26.6728	1.7313	0	0	0	5	0	0.76	0.32	0.275
1163	67	2	1	60	171	3	1	1	0	0	50.3	106.924	59.8	3	0	0	1	0	0	0	0	0	20.5191	1.6582	0	0	0	5	0	1.19	0.69	0.547
1164	72	1	2	58	160	2	2	1	0	0	80.2	51.3275	66.3	3	0	0	0	0	0	0	0	0	22.6562	1.5655	0	0	0	5	0	1.99	1.16	0.381
1165	62	2	1	70	168	2	1	1	1	0	79.3	84.5451	69	3	0	0	0	0	0	0	0	0	24.8016	1.7679	0	0	0	3	0	0.91	0.59	0.415
1166	70	1	2	45	155	2	3	1	0	0	64	51.371	50.5	3	0	0	1	0	0	0	1	0	18.7305	1.3686	0	0	0	4	0	2.43	1.36	0.944
1167	75	1	2	67	158	3	1	1	1	0	62.6	72.6109	63.7	3	0	0	1	0	0	0	1	0	26.8386	1.6685	0	0	0	4	0	2.09	0.71	0.806
1168	62	2	1	74	160	3	3	1	0	0	64.4	110.055	52.5	3	0	0	0	0	0	0	0	0	28.9062	1.7703	0	0	0	5	0	0.88	0.96	0.537
1169	77	1	2	62	152	3	2	1	1	1	125.3	32.5364	63.7	3	0	0	1	0	0	0	1	0	26.8352	1.5679	0	0	0	3	0	4.15	3.8	3.717
1170	58	2	1	71	170	2	2	1	0	0	87.3	81.8892	67.4	3	0	0	0	0	0	0	0	0	24.5675	1.7929	0	0	0	4	0	0.75	0.55	0.359
1171	65	2	1	76	174	2	1	1	1	0	72.1	97.0752	64.4	3	0	0	0	0	0	0	0	0	25.1024	1.8813	0	0	0	3	0	0.94	0.81	1.204
1172	72	1	1	65.5	163	2	1	0	1	0	63.6	85.9928	60	3	0	0	0	0	1	0	0	0	24.6528	1.6798	0	0	0	5	0	1.97	0.82	0.727
1173	67	2	1	73	175	2	3	1	1	0	208.5	31.384	59.8	3	0	0	0	0	0	0	0	0	23.8367	1.849	1	0	0	6	0	1.86	1.25	1.523
1174	59	2	2	56	156	3	1	0	0	0	46.4	102.034	60	3	0	0	0	0	0	0	0	0	23.0112	1.5155	0	0	0	4	0	0.98	0.46	0.394
1175	64	2	2	65	164	2	2	0	1	0	49.4	104.373	62.7	3	0	0	0	0	0	0	0	0	24.1672	1.6795	0	0	0	4	0	1.2	1.6	0.601
1176	76	1	1	71	172	2	1	1	1	0	107.1	52.0976	69.6	3	0	0	1	0	1	0	0	0	23.9995	1.8051	0	0	0	4	0	1.95	1.56	1.409
1177	49	2	1	80	170	1	3	1	0	0	65.4	136.686	58.9	3	0	0	0	0	0	0	0	0	27.6817	1.9081	0	0	0	4	0	0.5	0.26	0.248
1178	57	2	1	62	167	2	1	0	0	0	63.5	99.5096	64.4	3	0	0	0	0	0	0	0	0	22.231	1.6594	0	0	0	5	0	0.8	5	0.596
1179	60	2	1	87	170	3	2	1	1	0	70.6	121.052	65.9	3	0	0	0	0	0	0	0	0	30.1038	1.9977	0	1	0	4	0	0.62	0.32	0.236
1180	82	1	1	60	160	4	3	0	0	0	86.8	49.2298	49.7	3	0	0	1	0	0	1	0	0	23.4375	1.5911	0	0	0	5	0	3.84	2.22	2.228
1181	79	1	1	72	175	4	2	1	1	1	59.9	90.0336	64.7	3	0	0	0	0	0	0	0	0	23.5102	1.8362	0	0	0	4	0	1.95	1.09	2.023
1182	41	2	1	83	169	2	3	1	0	0	68.9	146.441	68.5	3	0	0	0	0	0	0	0	0	29.0606	1.9404	0	0	0	6	0	0.55	1.31	0.196
1183	61	2	1	85	175	3	1	1	1	0	78.4	105.172	66.4	3	0	0	0	3	0	0	0	0	27.7551	2.0026	0	0	0	6	0	0.71	1.6	0.259
1184	65	2	2	65	157	3	2	1	1	0	64.9	78.4003	61.2	2	0	0	0	0	0	0	0	0	26.3702	1.6368	0	0	0	3	0	1.2	1.03	0.781
1185	60	2	2	55	157	2	2	0	0	0	68.8	66.7501	61	3	0	0	0	0	0	0	0	0	22.3133	1.5088	0	0	0	5	0	1.22	0.46	0.646
1186	74	1	2	62	155	3	3	1	0	0	68.7	62.168	61.9	3	0	0	0	0	0	0	0	0	25.8065	1.5862	0	0	0	4	0	2.18	1.44	1.815
1187	61	2	1	73	173	2	2	1	0	0	53.3	132.859	66.9	3	0	0	0	0	0	0	0	0	24.3911	1.8368	0	0	0	6	0	0.74	1.17	0.434
1188	66	2	1	80	174	2	1	1	1	0	139.9	51.9604	67.4	3	0	0	0	2	0	0	0	0	26.4236	1.9325	0	0	1	6	0	1.42	1.62	0.638
1189	63	2	2	62	168	3	2	0	0	0	54.1	92.1028	40.1	1	0	0	1	0	0	0	0	0	21.9671	1.6655	0	0	0	1	0	1.01	0.44	0.433
1190	75	1	1	77	170	3	1	1	1	0	71.1	86.4377	65.4	3	0	0	0	0	0	0	0	0	26.6436	1.8697	0	0	0	5	0	1.47	0.82	0.908
1191	61	2	1	76	175	3	2	1	1	0	65.1	113.247	63.7	3	0	0	0	0	0	0	0	0	24.8163	1.8874	0	0	0	6	0	0.88	0.58	0.405
1192	51	2	1	83	175	2	1	1	0	0	59.6	152.192	59.7	3	0	0	0	0	0	0	0	0	27.102	1.977	0	0	0	4	0	0.55	0.5	0.183
1193	55	2	1	70	172	3	2	1	0	0	84.8	86.1569	69	3	0	0	0	0	0	0	0	0	23.6614	1.7923	0	0	0	3	0	0.69	0.58	0.326
1194	57	2	1	92	180	2	2	0	0	0	82	114.346	62.4	3	0	0	0	0	0	1	0	0	28.3951	2.1227	0	0	0	3	0	0.79	0.5	0.25
1195	64	2	2	60	156	1	1	0	0	0	30.5	156.046	69.9	3	0	0	1	0	0	0	1	0	24.6548	1.5667	0	0	0	3	0	1.28	1.12	0.541
1196	84	1	1	65	167	3	1	0	0	1	93.1	48.0088	60.7	3	0	0	0	0	0	0	0	0	23.3067	1.6978	0	0	0	3	0	3.29	1.69	1.902
1197	61	2	1	70	168	3	3	1	0	0	76.2	89.1126	65	3	0	0	0	0	0	0	0	0	24.8016	1.7679	0	0	0	4	0	0.83	0.91	0.483
1198	57	2	1	72	176	2	1	0	1	0	69.5	105.583	63.6	3	0	0	0	0	0	0	0	0	23.2438	1.8423	0	0	0	4	0	0.69	0.51	0.333
1199	70	1	1	52	169	1	1	1	0	0	99.7	44.8307	66.9	3	0	0	0	0	0	0	0	0	18.2066	1.5436	0	0	0	3	0	1.94	0.43	1.148
1200	62	2	1	65	168	3	1	1	0	0	75.2	82.7864	66.3	3	0	0	0	0	0	0	0	0	23.03	1.7039	0	0	0	4	0	0.95	0.34	0.385
1201	63	2	1	72	170	2	2	0	0	0	92.8	73.3574	64	3	0	0	0	0	0	0	0	0	24.9135	1.8057	0	0	0	4	0	0.95	0.35	0.394
1202	77	1	2	65	162	2	3	1	0	1	70.7	60.4536	57	3	0	1	0	0	0	0	0	0	24.7676	1.6673	0	0	0	2	1	4.46	3.89	2.82
1203	66	2	2	67	158	1	1	0	0	0	99.8	51.8518	64.4	1	0	0	1	0	0	1	1	0	26.8386	1.6685	0	0	0	2	0	1.53	1.2	1.02
1204	66	2	1	80	169	1	1	1	0	0	76.6	94.899	60.7	3	0	0	0	0	0	1	0	0	28.0102	1.902	0	0	0	4	0	1.21	0.73	0.613
1205	69	2	1	78	172	3	2	1	0	0	67.8	100.298	68.7	3	0	0	0	0	0	1	0	0	26.3656	1.8947	0	0	0	4	0	1.35	0.67	0.67
1206	62	2	2	68	168	2	2	1	0	0	86	64.3714	53.4	3	0	0	0	0	0	0	0	0	24.093	1.7423	0	0	0	6	0	1.09	0.66	0.576
1207	58	2	1	62	172	2	3	1	1	0	88.2	70.7792	63.4	3	0	0	1	0	0	0	0	0	20.9573	1.6899	0	0	0	3	0	0.84	0.99	0.578
1208	79	1	2	50	160	3	2	1	0	1	88.7	35.8892	61.2	3	0	0	0	0	0	0	0	0	19.5312	1.4631	0	0	0	5	0	3.78	2.07	2.379
1209	71	1	1	65	172	3	2	1	1	0	103.1	53.4162	69	3	0	0	0	0	0	0	0	0	21.9713	1.7283	0	0	0	5	0	1.6	1.06	0.862
1210	70	1	1	73	167	2	1	0	0	0	71.7	87.5126	67.4	3	0	0	0	0	0	0	0	0	26.1752	1.8002	0	0	0	4	0	1.24	0.67	0.558
1211	60	2	1	70	168	3	2	1	1	0	96.1	71.5539	46.7	3	0	0	1	0	0	0	0	0	24.8016	1.7679	0	0	0	5	0	0.94	0.82	0.17
1212	62	2	1	70	176	1	1	0	0	0	55	121.899	66.9	1	0	0	0	0	0	0	0	0	22.5981	1.8167	0	0	0	1	0	0.62	0.68	0.31
1213	71	1	1	75	165	3	2	1	0	0	83.3	76.2841	67.5	3	0	0	0	0	1	1	0	0	27.5482	1.8136	0	0	0	4	0	2.16	0.66	0.954
1214	44	2	1	80	169	1	2	0	1	0	56.9	165.736	46.6	3	0	0	0	0	0	0	0	0	28.0102	1.902	0	0	0	4	0	0.59	0.73	0.597
1215	52	2	1	81	167	1	3	0	1	0	69.6	125.756	65.9	3	0	0	0	0	0	0	0	0	29.0437	1.9026	0	0	0	4	0	0.6	0.66	0.384
1216	63	2	1	61	170	2	1	1	1	0	72.8	79.2242	64	3	0	0	0	0	0	0	0	0	21.1073	1.6649	0	0	0	5	0	1.01	0.7	0.655
1217	69	2	1	82	165	2	3	1	0	0	107.1	66.7501	60.7	3	0	0	0	0	0	0	0	0	30.1194	1.9032	0	1	0	4	0	1.32	0.78	0.839
1218	68	2	1	72	172	2	2	0	0	0	69.3	91.8545	52	3	0	0	0	0	0	0	0	0	24.3375	1.8179	0	0	0	4	0	1.08	0.55	0.437
1219	71	1	1	72	166	3	2	1	1	0	197.3	30.9189	40.9	3	0	2	0	2	0	0	0	0	26.1286	1.7813	1	0	1	4	1	4.92	37.2	3.254
1220	66	2	1	70	175	2	2	1	1	0	86.2	73.789	63	3	0	0	0	0	0	0	0	0	22.8571	1.8106	0	0	0	6	0	1.01	0.87	0.627
1221	72	1	2	70	165	3	2	1	1	0	46	108.003	64	3	0	0	0	0	0	0	0	0	25.7117	1.7496	0	0	0	5	0	1.66	0.91	0.967
1222	73	1	1	64	172	3	1	1	1	0	50	105.306	69.2	3	0	0	0	0	0	0	0	0	21.6333	1.7155	0	0	0	4	0	1.46	0.94	1.426
1223	55	2	1	77	170	3	2	1	0	0	58.6	137.145	66.9	3	0	0	0	0	0	0	0	0	26.6436	1.8697	0	0	0	4	0	0.65	0.54	0.327
1224	46	2	1	65	165	1	3	0	0	0	59.1	126.947	61.9	1	0	0	0	0	0	0	0	0	23.8751	1.6856	0	0	0	1	0	0.55	0.39	0.359
1225	76	1	1	64	168	3	2	1	1	0	187.4	26.8386	64.4	3	0	0	0	0	0	0	0	0	22.6757	1.6911	1	0	0	3	0	3.41	0.69	0.468
1226	59	2	1	60	172	3	1	1	1	1	102.2	58.1342	34.8	3	0	0	1	0	0	0	0	0	20.2812	1.6643	0	0	0	5	0	1.28	0.57	0.525
1227	63	2	1	70	166	2	1	0	0	0	72.7	90.6361	63.4	3	0	0	0	0	0	0	1	0	25.4028	1.7557	0	0	0	4	0	0.81	0.54	0.421
1228	50	2	1	90	174	2	1	1	0	0	90.1	109.902	63.8	1	0	0	0	0	0	0	0	0	29.7265	2.0605	0	0	0	2	0	0.55	0.21	0.21
1229	60	2	1	70	169	2	3	0	0	0	83.5	81.9876	60.9	3	0	0	1	0	0	0	0	0	24.5089	1.774	0	0	0	4	0	0.86	0.42	0.285
1230	52	2	1	75	175	2	1	0	1	0	83.4	96.7441	70.4	3	1	0	1	0	0	0	0	0	24.4898	1.8746	0	0	0	3	0	1.17	1.09	0.69
1231	74	1	1	61	165	3	3	1	0	1	109.1	45.1124	64.4	3	0	0	0	0	0	0	0	0	22.4059	1.6344	0	0	0	5	0	2.84	1.19	1.531
1232	63	2	1	78	175	2	3	1	1	0	91.5	80.2437	60.7	3	0	0	1	0	0	0	0	0	25.4694	1.913	0	0	0	5	0	1.31	0.82	0.893
1233	58	2	1	63	165	1	3	0	0	0	77.7	81.2793	64	3	0	0	0	0	0	0	1	0	23.1405	1.66	0	0	0	4	0	0.95	0.28	0.338
1234	68	2	1	95	172	2	1	0	0	0	101	82.7907	60	3	0	0	1	0	0	0	0	0	32.112	2.1123	0	1	0	5	0	1.23	0.6	0.637
1235	60	2	1	61	157	2	1	1	1	0	68.7	86.838	64.2	3	0	0	0	0	0	0	0	0	24.7475	1.5856	0	0	0	5	0	1.26	0.49	0.685
1236	75	1	1	65	170	2	1	1	0	0	75	68.8672	63	3	0	0	0	0	0	0	0	0	22.4913	1.7161	0	0	0	4	0	1.7	0.59	1.09
1237	77	1	2	45	156	3	1	1	0	0	46.2	63.7642	62.4	3	0	0	1	0	0	0	1	0	18.4911	1.3747	0	0	0	4	0	3.74	4.55	2.207
1238	48	2	1	58	168	2	1	1	0	0	58.4	111.699	60.6	3	0	0	1	0	0	0	0	0	20.5499	1.6143	0	0	0	4	0	0.73	0.36	0.493
1239	60	2	1	85	175	3	3	1	0	0	78.7	105.628	63.3	3	0	0	0	0	0	0	0	0	27.7551	2.0026	0	0	0	4	0	0.88	1.11	0.675
1240	74	1	1	70	173	2	1	1	0	0	89	63.4598	53.6	3	1	0	1	0	0	0	1	0	23.3887	1.7984	0	0	0	4	0	2.21	0.64	0.852
1241	74	1	1	70	173	3	1	1	0	0	89	63.4598	58.8	3	1	0	0	0	0	0	1	0	23.3887	1.7984	0	0	0	4	0	2.21	0.65	0.89
1242	67	2	1	65	170	2	1	1	0	0	104	55.7763	69	3	0	0	1	0	0	0	0	0	22.4913	1.7161	0	0	0	6	0	1.45	1.3	1.166
1243	63	2	2	61	160	2	1	0	0	0	35.5	137.486	64.8	3	0	0	1	0	0	0	0	0	23.8281	1.6039	0	0	0	4	0	1.29	0.96	0.939
1244	66	2	2	62	171	2	1	1	1	0	65.1	73.2332	64.4	3	0	0	0	0	0	0	0	0	21.2031	1.6838	0	0	0	5	0	1.76	0.39	0.639
1245	66	2	1	73	174	2	1	1	0	0	61.9	106.687	61	3	0	0	1	0	0	0	0	0	24.1115	1.8429	0	0	0	3	0	0.86	0.59	0.857
1246	64	2	1	64	175	2	1	1	0	0	75.3	78.9669	63	3	0	0	1	0	0	0	1	0	20.898	1.7338	0	0	0	4	0	0.95	0.7	0.275
1247	64	2	1	55	155	2	3	0	0	0	68.8	74.2736	54.2	3	0	0	1	0	0	0	1	0	22.8928	1.4966	0	0	0	4	0	2.44	1.2	1.566
1248	57	2	1	74	165	1	1	1	0	0	90.2	83.2434	50.5	3	0	0	0	0	0	0	0	0	27.1809	1.8008	0	0	0	3	0	0.58	0.31	0.203
1249	67	2	2	63	158	2	1	0	1	0	61	78.3428	67.4	3	0	0	1	0	0	0	0	0	25.2363	1.6173	0	0	0	4	0	1.79	1.56	1.181
1250	71	1	2	62	160	3	3	1	1	0	148	30.0362	61.9	3	1	0	0	0	0	0	0	0	24.2188	1.6167	0	0	0	3	0	5.54	2.89	2.94
1251	70	1	1	83	176	2	1	0	1	0	62.6	113.461	61.2	3	0	0	1	0	0	0	1	0	26.7949	1.9831	0	0	0	5	0	1.28	4.32	0.623
1252	50	2	1	66	172	4	1	1	0	0	106.9	67.929	62.7	3	0	0	1	0	0	0	0	0	22.3094	1.7411	0	0	0	5	0	0.64	0.87	0.422
1253	68	2	1	77	167	3	1	1	0	0	75.7	89.5311	67.9	3	0	0	1	0	0	0	0	0	27.6095	1.8514	0	0	0	5	0	1.08	0.55	0.658
1254	82	1	1	73	170	3	3	1	1	1	80.8	64.0599	63.4	3	0	0	1	0	1	0	0	0	25.2595	1.8185	0	0	0	4	0	5.31	5.07	2.274
1255	58	2	1	72	169	2	1	0	0	0	79	91.3621	66.4	3	0	0	1	0	0	0	0	0	25.2092	1.7996	0	0	0	4	0	0.79	0.49	0.261
1256	67	2	1	70	171	3	1	0	0	0	111.3	56.1271	64.4	3	0	0	0	0	0	0	0	0	23.939	1.7862	0	0	0	4	0	1.44	0.61	0.794
1257	70	1	2	55	156	2	3	0	1	0	158.8	25.1928	60	3	0	0	0	0	0	0	1	0	22.6003	1.5027	0	0	0	4	0	5.11	1.75	2.289
1258	58	2	1	87	170	3	1	1	0	0	72.4	120.46	63	3	0	0	1	0	0	0	0	0	30.1038	1.9977	0	1	0	5	0	0.65	0.63	0.197
1259	65	2	1	60	160	2	1	1	0	0	70.3	78.2535	60.3	3	0	0	1	0	0	0	0	0	23.4375	1.5911	0	0	0	4	0	1.35	1.23	0.317
1260	75	1	1	65	170	4	3	1	1	0	73.2	70.5606	37.9	3	0	0	1	0	1	0	1	0	22.4913	1.7161	0	0	0	5	0	4.15	1.04	1.288
1261	71	1	1	68	165	3	1	0	0	0	96	59.7494	36.2	3	0	0	1	0	1	0	1	0	24.977	1.724	0	0	0	5	0	2.65	0.72	1.316
1262	69	2	1	80	180	3	1	1	0	0	84.2	82.4675	65.2	3	0	0	0	0	0	0	0	0	24.6914	1.9691	0	0	0	5	0	1.06	0.69	0.325
1263	74	1	1	86	180	2	1	1	0	0	72.3	95.9734	62.8	3	0	0	1	0	0	0	1	0	26.5432	2.0459	0	0	0	5	0	1.27	0.82	0.773
1264	76	1	2	58	160	3	1	0	0	0	47.6	81.0339	60.1	3	1	0	1	0	0	1	1	0	22.6562	1.5655	0	0	0	3	0	3.99	1.26	1.427
1265	71	1	1	75	165	2	1	0	0	0	62	102.039	62.1	3	0	0	1	0	0	0	1	0	27.5482	1.8136	0	0	0	3	0	1.22	0.91	0.566
1266	66	2	1	72	158	1	1	1	0	0	77.1	84.4805	67.4	3	0	0	1	0	0	0	1	0	28.8415	1.7325	0	0	0	4	0	1.14	0.49	0.424
1267	62	2	1	71	169	1	1	0	0	0	78.6	86.1345	67.4	3	0	0	0	0	0	0	0	0	24.8591	1.7868	0	0	0	5	0	0.76	0.33	0.219
1268	65	2	1	91	168	3	1	1	0	0	64.6	129.157	70.7	3	0	0	1	0	0	0	1	0	32.2421	2.0367	0	1	0	5	0	0.75	0.58	0.448
1269	67	2	2	47	157	2	1	0	1	0	59.8	59.6191	65.6	3	0	0	1	0	0	0	0	0	19.0677	1.4064	0	0	0	4	0	2.37	0.93	0.992
1270	75	1	1	78	170	3	1	1	0	0	77.2	80.2855	63	3	0	0	1	0	0	0	0	0	26.9896	1.8825	0	0	0	4	0	1.56	0.87	0.744
1271	67	2	1	69	173	2	1	0	1	0	77.6	79.3518	43.8	3	0	0	1	0	0	0	1	0	23.0546	1.7856	0	0	0	5	0	1.13	0.47	0.692
1272	72	1	1	75	175	2	1	1	0	0	78.7	79.2213	58	3	0	0	0	2	0	0	0	0	24.4898	1.8746	0	0	0	4	0	1.45	0.82	1.361
1273	76	1	1	74	162	3	1	1	0	0	113.1	51.1913	65.2	3	0	0	0	0	0	0	0	0	28.1969	1.7825	0	0	0	5	0	2.34	0.79	1.647
1274	73	1	1	77	170	3	1	0	0	0	72.7	86.7517	42.2	3	0	0	1	0	0	0	1	0	26.6436	1.8697	0	0	0	5	0	1.5	0.39	0.854
1275	69	2	2	49.5	158	2	1	1	0	0	54.8	66.6421	64.8	3	0	0	0	0	1	0	0	0	19.8286	1.4445	0	0	0	4	0	1.98	2.34	1.253
1276	63	2	1	71	163	3	1	1	0	0	57.2	116.842	66.3	2	0	0	1	0	0	0	0	0	26.7229	1.7502	0	0	0	2	0	0.69	1.1	0.163
1277	54	2	1	69	165	2	1	1	0	0	91.7	79.1088	63	3	0	0	1	0	0	0	0	0	25.3444	1.7368	0	0	0	4	0	0.75	0.81	0.383
1278	69	2	1	73	170	2	1	0	0	0	108.9	58.1835	54	3	0	0	0	0	0	0	0	0	25.2595	1.8185	0	0	0	4	0	0.88	0.67	0.541
1279	69	2	1	79	170	3	1	1	0	0	54.1	126.746	60.7	3	0	0	1	0	0	0	1	0	27.3356	1.8953	0	0	0	5	0	1.18	0.61	0.552
1280	59	2	1	53	158	2	1	0	0	0	66.8	78.5654	62.7	1	0	0	0	0	0	0	0	0	21.2306	1.4893	0	0	0	2	0	1.13	1.3	0.604
1281	54	2	1	70	172	3	3	1	0	0	74.6	98.6517	44.5	3	0	0	0	0	0	0	0	0	23.6614	1.7923	0	0	0	5	0	0.71	0.53	0.424
1282	70	1	2	70	164	2	1	1	0	1	62.9	80.9489	70.4	3	0	0	1	0	0	0	0	0	26.0262	1.7435	0	0	0	4	0	1.79	1.02	0.802
1283	62	2	1	78	170	2	1	1	0	0	71.2	104.461	70.4	3	0	0	0	0	0	0	0	0	26.9896	1.8825	0	0	0	4	0	0.69	0.75	0.217
1284	58	2	1	51	170	3	1	1	0	0	57.5	88.9125	67.4	3	0	0	1	0	0	0	0	0	17.6471	1.5369	0	0	0	4	0	0.98	1.05	0.859
1285	55	2	1	90	182	2	1	0	0	0	62.1	150.597	61.5	3	0	0	0	0	0	0	0	0	27.1706	2.1093	0	0	0	4	0	0.67	0.76	0.226
1286	76	1	1	74	165	3	1	0	0	0	60.3	96.0154	66.9	3	0	0	1	0	0	0	0	0	27.1809	1.8008	0	0	0	3	0	1.55	0.57	0.852
1287	52	2	1	71	170	2	1	0	0	0	71.5	106.827	68	3	0	0	0	2	0	0	0	0	24.5675	1.7929	0	0	0	3	0	0.55	1.62	0.265
1288	58	2	1	82	174	3	1	0	0	0	62.6	131.311	65	3	0	0	1	0	0	0	0	0	27.0842	1.9581	0	0	0	4	0	0.57	1.04	0.347
1289	58	2	1	65	160	3	3	0	0	0	75.2	86.6475	63.3	3	0	0	0	0	0	0	0	0	25.3906	1.6551	0	0	0	5	0	0.76	0.57	0.475
1290	55	2	1	74	168	1	3	1	1	0	46	167.163	65.9	3	0	0	0	0	0	0	0	0	26.2188	1.8191	0	0	0	5	0	0.76	0.54	0.32
1291	62	2	1	63	165	2	1	0	0	0	57.8	103.933	63.3	3	0	0	1	0	0	0	0	0	23.1405	1.66	0	0	0	4	0	0.67	0.31	0.255
1292	61	2	1	70	172	4	3	0	0	0	89.5	75.5351	20.9	3	0	0	1	0	0	0	2	0	23.6614	1.7923	0	0	0	4	1	1.08	0.54	0.421
1293	50	2	1	95	176	2	1	0	1	0	75	139.364	59.9	3	0	0	0	0	0	0	0	0	30.6689	2.1367	0	1	0	5	0	0.71	0.41	0.328
1294	73	1	2	66	160	2	1	1	0	0	66.9	68.6844	66.3	3	0	0	1	0	0	0	1	0	25.7812	1.6679	0	0	0	3	0	2.76	0.66	0.748
1295	66	2	2	62	160	3	1	1	1	1	84.7	56.2867	59	3	0	0	1	0	0	0	0	0	24.2188	1.6167	0	0	0	4	0	1.44	0.99	1.27
1296	72	1	1	64	158	2	3	1	1	0	88.1	60.3893	45	3	0	0	0	0	0	0	0	0	25.6369	1.6301	0	0	0	4	0	1.6	1.15	0.793
1297	56	2	1	73	172	2	1	1	0	0	72	104.116	64.7	3	0	0	1	0	0	0	0	0	24.6755	1.8307	0	0	0	4	0	0.69	0.38	0.237
1298	84	1	1	70	165	3	3	1	0	0	70.4	68.0707	67.4	3	0	0	0	0	0	0	1	0	25.7117	1.7496	0	0	0	3	0	2.82	1.02	1.729
1299	63	2	1	70	167	2	1	0	0	0	78.8	83.6198	64.7	3	0	0	1	0	0	0	1	0	25.0995	1.7618	0	0	0	5	0	0.95	0.3	0.335
1300	73	1	2	74.1	160	2	1	1	0	0	57.1	90.3488	66	3	0	0	0	0	0	0	0	0	28.9453	1.77158	0	0	0	4	0	1.76	0.77	1.201
1301	70	1	1	77	171	2	1	0	0	0	70.4	93.5972	65.4	3	0	0	1	0	0	0	0	0	26.3329	1.8758	0	0	0	3	0	1.01	0.68	0.565
1302	64	2	1	77	174	2	1	0	0	0	78.1	91.601	61.9	3	0	0	0	0	0	0	0	0	25.4327	1.8941	0	0	0	4	0	0.87	1.06	1.499
1303	70	1	1	70	170	2	3	0	0	0	49.2	121.752	63.4	3	0	0	1	0	0	0	0	0	24.2215	1.7801	0	0	0	5	0	1.15	1.5	0.322
1304	78	1	1	65	167	2	1	1	0	1	160	30.7916	64.7	3	0	0	0	0	0	0	0	0	23.3067	1.6978	0	0	0	4	0	3.35	5.77	2.069
1305	62	2	1	68	175	2	1	1	1	0	72.9	88.9452	55.1	3	0	0	0	0	0	0	0	0	22.2041	1.785	0	0	0	6	0	1.01	0.9	0.431
1306	53	2	1	81	175	1	1	1	0	0	85.1	101.233	61.9	3	0	0	1	0	0	0	0	0	26.449	1.9514	0	0	0	3	0	0.55	0.39	0.516
1307	76	1	1	73	175	3	1	1	1	0	106.4	53.6794	63	3	0	0	0	0	1	0	0	0	23.8367	1.849	0	0	0	3	0	3.39	4.21	1.14
1308	51	2	1	62	170	2	1	1	0	0	56	120.459	61	3	0	0	0	0	0	0	1	0	21.4533	1.6777	0	0	0	3	0	0.82	0.54	0.446
1309	58	2	1	58	170	2	1	1	0	0	78.5	74.066	67.4	3	0	0	0	0	0	0	0	0	20.0692	1.6265	0	0	0	6	0	0.95	0.87	0.544
1310	62	2	1	70	168	3	1	1	0	0	58	115.083	63.4	3	0	0	0	0	0	0	0	0	24.8016	1.7679	0	0	0	5	0	0.85	0.46	0.318
1311	69	2	1	75	170	2	1	1	0	0	75.1	86.6815	64.4	3	0	0	1	0	0	0	0	0	25.9516	1.8441	0	0	0	4	0	0.95	0.31	0.429
1312	74	1	1	72	168	2	1	0	0	0	61.3	94.7682	40.3	3	0	0	1	0	0	0	0	0	25.5102	1.7935	0	0	0	4	0	1.67	0.49	1.554
1313	67	2	2	60	160	2	3	1	0	0	63.7	71.4497	68.8	3	0	0	1	0	0	0	1	0	23.4375	1.5911	0	0	0	4	0	1.43	0.85	0.508
1314	69	2	2	64	152	2	1	1	0	0	63.5	74.3584	62.4	3	0	0	1	0	0	0	0	0	27.7008	1.5935	0	0	0	5	0	1.82	1.28	1.281
1315	52	2	1	85	170	2	1	0	0	0	71.9	127.18	65	1	0	0	0	0	0	0	0	0	29.4118	1.9721	0	0	0	2	0	0.5	0.36	0.234
1316	62	2	1	76	170	2	3	0	0	0	66.8	108.487	50.1	3	0	0	1	0	0	0	0	0	26.2976	1.8569	0	0	0	4	0	0.78	1.47	0.356
1317	35	2	1	80	165	1	3	0	0	0	69.6	147.542	60.9	3	0	2	1	0	0	0	0	0	29.3848	1.8776	0	0	0	4	1	0.68	2.24	0.469
1318	66	2	1	64	165	3	3	1	1	0	64.7	89.4858	50	3	0	0	0	0	0	0	1	0	23.5078	1.6728	0	0	0	5	0	1.35	0.39	0.455
1319	52	2	1	62.5	168	2	3	0	0	0	62.5	107.579	61	3	0	0	1	0	0	0	1	0	22.1443	1.6719	0	0	0	4	0	0.55	0.73	0.279
1320	77	1	1	68	171	2	3	0	0	0	83.9	62.4215	68.5	3	0	0	0	0	0	0	0	0	23.255	1.7606	0	0	0	4	0	1.76	0.89	0.935
1321	61	2	2	65	150	3	1	1	0	0	58.7	90.9009	64.4	3	0	0	0	0	0	0	0	0	28.8889	1.5941	0	0	0	4	0	1.08	0.42	0.461
1322	75	1	1	66.6	174	2	1	0	0	0	76	69.6339	61.3	3	0	0	1	0	0	0	0	0	21.9976	1.76098	0	0	0	5	0	1.74	1.09	1.236
1323	43	2	1	78	175	2	3	0	0	0	65.3	141.645	67.4	3	0	0	0	0	0	0	0	0	25.4694	1.913	0	0	0	5	0	0.55	0.86	0.26
1324	62	2	1	68	170	3	1	0	0	0	73.1	88.7019	67.4	3	0	0	1	0	0	0	0	0	23.5294	1.7545	0	0	0	4	0	0.8	0.89	0.994
1325	71	1	1	79	172	2	1	0	0	0	102	65.3315	32.7	3	0	0	1	0	0	0	2	0	26.7036	1.9075	0	0	0	4	0	1.35	0.8	0.528
1326	71	1	1	71	165	1	1	1	0	0	103.5	57.8647	64.5	1	1	0	0	0	0	0	0	0	26.079	1.7624	0	0	0	1	0	1.03	0.66	0.437
1327	64	2	1	53	165	2	1	0	1	0	89.9	54.7743	63.3	3	0	0	0	0	0	0	0	0	19.4674	1.532	0	0	0	4	0	1.03	1.1	0.486
1328	67	2	1	72	175	2	1	1	0	0	62.6	102.643	51.3	3	0	0	1	0	0	0	1	0	23.5102	1.8362	0	0	0	5	0	0.95	0.35	0.409
1329	50	2	1	83	176	3	1	1	1	0	65.9	138.574	62.4	3	0	0	0	0	0	0	0	0	26.7949	1.9831	0	0	0	5	0	0.68	0.29	0.265
1330	62	2	2	68	163	2	1	0	0	0	52.5	104.981	63.7	3	0	0	0	0	0	0	0	0	25.5937	1.7118	0	0	0	6	0	1.28	0.75	0.432
1331	75	1	1	72	170	3	3	0	0	0	118.9	48.1183	64.4	3	0	0	0	0	0	0	0	0	24.9135	1.8057	0	0	0	4	0	1.84	1.53	0.673
1332	76	1	2	64	153	3	1	1	1	1	65.3	65.1797	62.4	3	0	0	1	0	0	0	0	0	27.3399	1.5996	0	0	0	4	0	3.35	1.52	2.04
1333	72	1	1	75	180	3	1	0	0	0	82.3	75.756	43.9	3	0	0	1	0	1	0	1	0	23.1481	1.9051	0	0	0	3	0	1.55	0.65	0.703
1334	62	2	1	50	160	2	1	1	0	0	50.7	94.038	60	1	0	0	1	0	0	0	1	0	19.5312	1.4631	0	0	0	2	0	1.11	1.03	0.39
1335	42	2	1	66	155	2	1	1	1	0	61.7	128.154	66.9	3	0	0	0	0	0	0	0	0	27.4714	1.6374	0	0	0	4	0	0.58	0.54	0.254
1336	70	1	1	56	156	1	1	0	1	0	61.6	77.7951	64.7	3	0	0	0	0	0	0	0	0	23.0112	1.5155	0	0	0	4	0	2.24	1.15	1.377
1337	53	2	1	83	173	2	1	0	0	0	89.2	98.9644	61.9	3	0	0	0	0	0	0	0	1	27.7323	1.9648	0	0	0	6	0	0.6	0.78	0.426
1338	68	2	1	82	175	1	3	0	0	0	78.4	92.0613	65.9	3	0	0	1	0	1	0	1	0	26.7755	1.9642	0	0	0	3	0	1.17	0.44	0.522
1339	69	2	1	75	178	2	1	0	0	0	73.3	88.8101	67.9	1	0	0	1	0	0	0	0	0	23.6713	1.8929	0	0	0	2	0	0.95	0.53	0.366
1340	74	1	1	69	165	2	1	1	1	0	74.3	74.9292	64.2	3	0	0	0	0	0	0	0	0	25.3444	1.7368	0	0	0	4	0	2.12	3.07	1.3
1341	69	2	1	71.5	173	2	1	1	0	0	162.1	38.2849	61.5	3	0	0	0	0	0	0	0	0	23.8899	1.8176	0	0	0	4	0	1.85	0.94	0.858
1342	71	1	1	70.5	170	2	1	0	1	0	74.6	79.7161	65.4	3	0	0	0	0	0	0	1	0	24.3945	1.7865	0	0	0	5	0	1.74	0.87	1.099
1343	61	2	2	62	158	2	1	0	1	0	45.1	112.852	60.2	3	0	0	1	0	0	0	0	0	24.8358	1.6045	0	0	0	4	0	1.32	1.79	2.052
1344	76	1	2	65	150	2	1	1	0	0	61.4	70.4029	62.4	3	0	0	1	0	0	0	0	0	28.8889	1.5941	0	0	0	4	0	2.35	0.65	1.574
1345	58	2	1	78	180	2	1	1	0	0	75.8	103.154	62.7	3	0	0	1	0	0	0	0	0	24.0741	1.9435	0	0	0	3	0	0.71	0.74	0.576
1346	65	2	1	67	162	1	1	0	0	0	92.6	66.3394	65.6	3	0	0	0	0	0	0	0	0	25.5296	1.6929	0	0	0	5	0	1.28	0.55	0.807
1347	63	2	2	55	159	2	1	1	0	1	49.6	88.7232	66.3	3	0	0	0	0	0	0	0	0	21.7555	1.521	0	0	0	4	0	1.28	0.77	0.435
1348	70	1	1	64	176	3	3	1	0	0	64.1	85.4411	64.4	3	0	0	0	0	0	0	0	0	20.6612	1.7399	0	0	0	5	0	1.27	1.41	0.686
1349	65	2	1	66.7	166	3	1	0	0	0	937	6.52671	64.4	3	0	0	1	0	0	0	1	0	24.2053	1.71346	1	0	0	4	0	1.26	0.65	0.615
1350	66	2	1	71	170	2	1	1	0	0	79.8	80.4885	66.9	3	0	0	0	0	0	0	0	0	24.5675	1.7929	0	0	0	4	0	0.98	0.41	0.501
1351	62	2	2	64	160	2	3	1	1	0	45.9	113.013	64.8	3	0	0	0	0	0	0	1	0	25	1.6423	0	0	0	4	0	1.2	2.2	1.096
1352	72	1	1	62	175	2	1	0	0	1	62.4	82.5967	67.4	3	0	0	0	0	0	0	0	0	20.2449	1.7082	0	0	0	4	0	1.37	0.53	0.942
1353	50	2	1	80	178	2	3	1	0	0	100.5	87.5817	57.1	3	0	0	1	0	0	0	0	0	25.2493	1.9569	0	0	0	4	0	0.55	0.86	0.487
1354	63	2	1	72	167	3	1	1	0	0	122.7	55.2364	64	3	0	0	0	0	0	0	1	0	25.8166	1.7874	0	0	0	5	0	1.08	0.74	0.71
1355	76	1	1	65	170	2	1	0	0	0	93.8	54.2172	62.4	3	0	0	0	0	0	0	0	0	22.4913	1.7161	0	0	0	4	0	1.56	0.77	0.696
1356	64	2	1	67	170	3	1	0	0	0	71.1	87.5519	64.4	3	0	0	1	0	0	0	0	0	23.1834	1.7417	0	0	0	5	0	0.95	0.68	0.351
1357	69	2	1	69	162	2	1	1	1	0	76.4	78.39	61.5	3	0	0	0	0	0	0	0	0	26.2917	1.7185	0	0	0	5	0	1.48	0.5	0.872
1358	66	2	2	60	153	2	1	0	0	0	79.1	58.3273	55	3	0	0	1	0	0	0	0	0	25.6312	1.5484	0	0	0	4	0	1.24	0.7	0.531
1359	49	2	1	97	175	2	1	1	1	0	79.4	135.906	61.5	3	0	0	0	0	0	0	0	0	31.6735	2.1562	0	1	0	4	0	0.68	0.59	0.36
1360	74	1	1	73	172	3	1	0	0	0	103.8	56.7435	55.7	3	0	0	1	0	1	0	0	0	24.6755	1.8307	0	0	0	4	0	2.24	1.46	1.736
1361	52	2	1	85	173	1	1	1	0	0	47	194.559	63	3	0	0	1	0	0	0	0	0	28.4005	1.9904	0	0	0	4	0	0.53	0.38	0.25
1362	61	2	1	59.6	170	2	1	1	0	0	67.7	85.022	58.9	3	0	0	1	0	0	0	1	0	20.6228	1.64698	0	0	0	4	0	1.02	1.64	0.65
1363	57	2	1	60	150	1	1	1	0	1	113.7	53.5446	62.1	3	0	0	0	0	0	0	1	0	26.6667	1.5301	0	0	0	4	0	1.19	0.49	0.534
1364	58	2	2	55	156	2	1	0	0	0	64.6	72.5454	57.8	3	0	2	0	0	0	0	0	0	22.6003	1.5027	0	0	0	3	1	1.26	4.17	0.947
1365	66	2	1	71	167	3	1	1	0	1	80.8	79.4924	66.4	3	0	0	0	0	0	0	1	0	25.4581	1.7746	0	0	0	3	0	1.18	0.37	0.802
1366	64	2	2	70	155	2	1	1	1	1	50.9	108.607	65.2	1	0	0	1	0	0	0	0	0	29.1363	1.6886	0	0	0	1	0	1.35	0.22	0.397
1367	66	2	1	85	175	2	1	1	0	0	83	92.6444	63.3	3	0	0	1	0	0	0	0	0	27.7551	2.0026	0	0	0	3	0	1.91	0.42	0.902
1368	65	2	1	87	166	2	1	0	0	0	69.1	115.438	69.1	3	0	0	1	0	0	0	0	0	31.5721	1.9733	0	1	0	5	0	0.76	0.61	0.546
1369	61	2	2	60	154	2	3	1	1	0	131.3	37.5128	62.4	3	0	0	0	0	0	0	0	0	25.2994	1.5545	0	0	0	4	0	2.05	0.57	1.232
1370	67	2	1	74	168	2	1	0	1	1	51.7	127.735	63	3	0	0	0	0	0	0	0	0	26.2188	1.8191	0	0	0	3	0	1.22	0.7	0.456
1371	45	2	1	80	171	3	1	0	0	0	82.2	113.029	65.9	3	0	0	0	0	0	0	1	0	27.3588	1.9142	0	0	0	3	0	0.55	0.41	0.253
1372	77	1	2	70	155	3	3	1	1	0	91.8	49.9185	60.1	3	0	0	1	0	0	0	0	0	29.1363	1.6886	0	0	0	2	0	3	1.62	2.12
1373	58	2	2	70	160	2	1	1	0	0	48.5	122.98	60.1	3	0	0	0	0	0	0	0	0	27.3438	1.7191	0	0	0	4	0	0.79	0.53	0.593
1374	62	2	1	74	170	4	1	0	1	0	140.6	50.1866	35	3	0	0	1	0	1	0	1	0	25.6055	1.8313	0	0	0	3	0	2.44	0.56	1.242
1375	71	1	2	63	155	3	1	0	1	0	55.1	81.9792	68.7	3	0	0	0	0	0	0	0	0	26.2227	1.599	0	0	0	5	0	2.22	0.57	1.28
1376	79	1	1	82	180	3	1	0	0	0	95.3	64.1649	60.5	1	0	0	0	0	0	0	0	0	25.3086	1.9947	0	0	1	2	0	1.78	1.57	1.028
1377	71	1	1	70	168	2	3	1	0	0	82.4	71.6583	42	3	0	0	0	0	0	0	1	0	24.8016	1.7679	0	0	0	4	0	1.28	0.77	0.8
1378	69	2	1	92	174	3	1	0	0	0	100.4	79.5352	51.6	3	0	0	1	0	0	1	0	0	30.3871	2.0861	0	1	0	5	0	1.18	0.67	0.474
1379	67	2	1	83	168	2	1	0	0	0	78.4	94.4782	67.4	3	0	0	1	0	0	0	0	0	29.4076	1.9343	0	0	0	6	0	0.89	0.6	0.411
1380	65	2	1	97	180	2	1	1	0	0	93.4	95.221	65	3	0	0	1	0	0	0	0	0	29.9383	2.1867	0	0	0	6	0	0.95	0.31	0.265
1381	71	1	1	70	174	3	3	1	0	1	62.9	93.8735	61.9	3	0	0	1	0	0	0	0	0	23.1206	1.8045	0	0	0	4	0	1.31	0.81	0.846
1382	41	2	1	67	169	2	1	0	1	0	75	108.117	64	3	0	0	0	0	0	0	0	0	23.4586	1.7356	0	0	0	4	0	0.73	0.41	0.654
1383	76	1	1	67	175	2	1	1	0	0	85.4	61.3824	64.4	3	1	0	1	0	0	0	0	0	21.8776	1.7722	0	0	0	5	0	2.41	1.08	1.618
1384	63	2	1	70	165	2	1	0	0	0	191.3	34.4445	60	3	0	0	0	0	0	0	0	0	25.7117	1.7496	1	0	0	5	0	1.81	0.66	0.639
1385	44	2	1	65	175	3	1	1	0	0	115.4	66.1037	41.5	3	0	0	0	0	0	0	1	0	21.2245	1.7466	0	0	0	4	0	0.95	0.3	0.26
1386	69	2	1	65	172	3	1	1	0	0	55	102.578	62.4	3	0	0	1	0	0	0	0	0	21.9713	1.7283	0	0	0	5	0	1.07	0.47	0.673
1387	64	2	1	67	176	2	1	1	0	0	105	59.2851	45.2	3	0	0	1	0	0	0	0	0	21.6296	1.7783	0	0	0	5	0	1.28	0.57	0.291
1388	71	1	1	75	178	2	1	0	0	0	73.3	86.3084	60.5	3	0	0	0	0	0	1	0	0	23.6713	1.8929	0	0	0	4	0	1.15	0.57	0.506
1389	62	2	1	76	170	2	1	1	0	0	67.1	108.002	60	3	0	0	1	0	0	0	0	0	26.2976	1.8569	0	0	0	4	0	0.79	0.35	0.283
1390	67	2	1	71	168	2	1	1	0	1	58.4	108.496	63.4	3	0	0	0	0	0	0	1	0	25.1559	1.7807	0	0	0	5	0	1.12	0.63	0.694
1391	68	2	1	90	177	2	1	0	0	0	100.2	79.0595	62.7	3	0	0	0	0	0	0	1	0	28.7274	2.0788	0	0	1	4	0	0.97	0.64	0.891
1392	74	1	1	70	174	3	1	0	0	0	81.6	69.2147	45.9	3	0	0	1	0	0	0	1	0	23.1206	1.8045	0	0	0	5	0	1.26	1.55	0.927
1393	61	2	1	63	160	3	1	0	0	0	63.4	95.9677	63.7	3	0	0	1	0	0	0	0	0	24.6094	1.6295	0	0	0	5	0	0.96	0.56	1.108
1394	76	1	2	64	166	4	3	1	0	0	77.8	54.7074	69.6	3	0	0	1	0	0	0	1	0	23.2254	1.6789	0	0	0	5	0	2.13	0.49	0.421
1395	48	2	1	75	170	2	3	1	0	0	72.7	116.028	63.1	3	0	0	0	0	0	0	0	0	25.9516	1.8441	0	0	0	5	0	0.5	0.75	0.273
1396	58	2	2	60	156	2	1	1	0	0	68	75.1834	63.6	1	0	0	1	0	0	0	0	0	24.6548	1.5667	0	0	0	2	0	0.93	0.69	0.586
1397	78	1	1	88	175	3	3	1	0	0	96.5	69.1184	63.1	3	0	0	1	0	0	0	0	0	28.7347	2.041	0	0	0	4	0	1.74	1.1	0.812
1398	67	2	1	72	168	2	1	0	0	0	65.5	98.0981	66.4	3	0	0	1	0	0	0	0	1	25.5102	1.7935	0	0	0	5	0	1.05	1.14	0.921
1399	66	2	1	70	170	1	1	0	0	0	76.5	82.778	63	3	0	0	1	0	0	0	0	0	24.2215	1.7801	0	0	0	5	0	0.94	0.64	0.818
1400	59	2	2	72.3	168	3	3	1	1	0	79.8	76.2581	61.9	3	0	0	0	0	0	0	0	0	25.6165	1.79734	0	0	0	3	0	1.16	0.57	1.051
1401	75	1	1	82	176	3	1	1	0	0	78.4	83.1109	66.4	3	0	0	1	0	0	0	0	0	26.4721	1.9703	0	0	0	4	0	1.38	0.65	0.968
1402	75	1	1	68	172	2	1	1	1	0	75.8	71.2853	61.9	3	0	0	1	0	0	0	0	0	22.9854	1.7667	0	0	0	4	0	1.95	0.74	1.037
1403	63	2	1	79	184	2	1	0	0	0	78.9	94.2513	63.4	3	0	0	1	0	0	0	0	0	23.3341	1.9807	0	0	0	5	0	0.87	0.45	0.377
1404	59	2	1	60	172	2	1	0	1	0	74.9	79.3234	64.4	3	0	0	0	0	0	0	0	0	20.2812	1.6643	0	0	0	5	0	1.04	0.35	0.611
1405	75	1	1	58	170	1	1	1	1	0	93.6	49.2393	65.6	3	0	0	0	0	0	0	1	0	20.0692	1.6265	0	0	0	3	0	2.37	2.19	1.333
1406	78	1	1	72	172	2	1	0	0	0	93	58.6797	62.1	3	0	0	0	0	0	0	0	0	24.3375	1.8179	0	0	0	5	0	1.49	0.71	0.681
1407	51	2	1	61	173	2	3	0	0	0	62.3	106.532	61.5	1	0	0	0	0	0	0	0	0	20.3816	1.6832	0	0	0	2	0	0.5	0.57	0.39
1408	44	2	1	67	162	4	3	0	0	0	48.2	163.134	33.4	3	0	0	0	0	0	0	0	0	25.5296	1.6929	0	0	0	3	0	0.71	0.44	0.337
1409	69	2	1	71	172	2	1	1	0	1	85.1	72.4159	63.7	3	0	0	1	0	0	0	0	0	23.9995	1.8051	0	0	0	5	0	1.28	0.29	0.678
1410	65	2	1	83	175	3	1	0	1	0	122.3	62.2242	60	3	0	0	1	0	0	0	0	0	27.102	1.977	0	0	0	4	0	1.44	1.01	0.589
1411	54	2	1	95	170	2	1	1	0	0	70	142.683	61.5	3	0	0	0	0	0	0	0	0	32.872	2.1001	0	1	0	5	0	0.55	0.35	0.286
1412	66	2	1	65	165	2	1	1	0	0	76.1	77.2693	69.2	3	0	0	1	0	0	0	0	0	23.8751	1.6856	0	0	0	5	0	0.94	0.62	0.613
1413	64	2	1	72	172	1	1	1	0	0	71.8	93.1683	65.9	2	0	0	0	0	0	0	0	0	24.3375	1.8179	0	0	0	2	0	0.79	0.45	0.294
1414	70	1	2	80	176	1	1	0	0	0	106.5	54.6392	62.1	3	0	0	0	0	0	0	0	0	25.8264	1.9447	0	0	1	4	0	1.88	1.29	1.194
1415	72	1	1	60	165	4	3	0	0	0	65.3	76.3825	38.5	3	0	0	1	1	0	0	0	0	22.0386	1.6216	0	0	0	4	1	1.92	0.61	0.936
1416	52	2	1	65	172	2	1	0	0	0	47.6	146.905	52.5	3	0	0	1	0	0	0	0	0	21.9713	1.7283	0	0	0	6	0	0.66	1.06	0.335
1417	54	2	1	81	175	2	1	0	1	0	58.2	146.321	63	3	0	0	1	0	0	0	0	0	26.449	1.9514	0	0	0	6	0	0.69	0.49	0.292
1418	75	1	1	59	152	1	1	1	0	1	58.1	80.693	61	3	1	0	0	0	0	0	0	0	25.5367	1.5295	0	0	0	4	0	1.95	0.84	1.648
1419	60	2	1	77	165	2	3	0	1	0	131	57.4852	56	3	0	0	1	0	0	0	0	0	28.2828	1.8392	0	0	0	5	0	1.32	1.46	0.61
1420	58	2	1	60	175	2	1	0	0	0	77.9	77.2101	63	3	0	0	0	0	0	0	0	0	19.5918	1.6826	0	0	0	5	0	0.81	0.59	0.434
1421	72	1	1	80	168	2	1	0	0	0	91.1	73.0007	61.9	3	0	0	0	0	0	1	0	0	28.3447	1.8959	0	0	0	5	0	1.7	0.57	2.64
1422	72	1	1	80	174	2	3	1	0	0	89.2	74.5557	59.9	3	0	0	0	0	1	0	0	0	26.4236	1.9325	0	0	0	4	0	1.6	0.92	0.732
1423	70	1	1	66	164	3	1	0	0	0	82.7	68.2941	66.9	3	0	0	1	0	0	0	0	0	24.539	1.6923	0	0	0	4	0	1.39	0.64	0.954
1424	65	2	1	81	170	3	1	0	1	0	109	68.1344	66.4	3	0	0	1	0	0	0	0	0	28.0277	1.9209	0	0	0	4	0	1.61	0.65	1.191
1425	53	2	1	72	175	1	1	1	0	0	60.2	127.204	65.8	3	0	0	0	0	0	0	0	0	23.5102	1.8362	0	0	0	5	0	0.68	0.74	0.488
1426	75	1	1	56	164	3	1	0	0	0	75.9	58.6282	68	3	0	0	1	0	0	0	0	0	20.8209	1.5643	0	0	0	4	0	1.49	3.06	1.145
1427	64	2	1	70	175	2	1	1	0	0	88.3	73.6542	65.2	3	0	0	0	0	0	0	0	0	22.8571	1.8106	0	0	0	5	0	0.99	1.03	0.735
1428	52	2	1	55	170	2	1	1	0	0	60.4	97.9614	65.2	3	0	0	1	0	0	0	0	0	19.0311	1.5881	0	0	0	3	0	0.76	0.54	0.297
1429	64	2	1	80	170	2	1	0	0	0	62.5	118.924	64.7	3	0	0	1	0	0	0	0	0	27.6817	1.9081	0	0	0	3	0	0.8	0.64	0.367
1430	59	2	1	73	168	1	1	0	0	0	66.6	108.538	63	3	0	0	0	0	0	0	1	0	25.8645	1.8063	0	0	0	4	0	0.73	0.76	0.359
1431	63	2	1	70	172	2	1	0	0	0	49.8	132.314	65.8	3	0	0	0	2	0	0	0	1	23.6614	1.7923	0	0	0	6	0	0.85	0.51	0.271
1432	64	2	1	73	173	2	1	0	0	0	75	90.4319	68.4	3	0	0	0	0	0	0	0	0	24.3911	1.8368	0	0	0	3	0	0.72	0.44	0.347
1433	69	2	1	75	167	3	1	0	0	0	90.3	72.0906	67.4	3	0	0	1	0	0	0	1	0	26.8923	1.8258	0	0	0	5	0	1.06	0.71	0.539
1434	70	1	1	60	168	2	1	0	0	0	81.9	62.692	61.4	3	0	0	0	0	1	0	0	0	21.2585	1.6399	0	0	1	5	0	1.92	1.01	1.432
1435	52	2	1	83	172	3	3	0	1	0	104.2	85.6919	40.4	3	0	0	1	0	0	0	0	0	28.0557	1.9587	0	0	0	5	0	0.95	0.32	0.509
1436	68	2	1	57	160	2	1	1	0	0	79	63.5078	63	1	0	0	1	0	0	0	0	0	22.2656	1.5527	0	0	0	2	0	1.24	1.27	0.229
1437	60	2	1	77	168	2	1	1	0	0	85.7	87.8712	64.7	3	0	0	0	0	0	0	0	0	27.2817	1.8575	0	0	0	4	0	0.86	0.72	0.515
1438	67	2	1	62	170	1	1	0	0	0	76.2	72.6116	60	3	0	0	0	0	0	0	0	0	21.4533	1.6777	0	0	0	5	0	1.22	0.61	0.84
1439	40	2	1	86	175	2	2	0	0	0	64.7	162.495	66.4	3	0	0	0	0	0	0	0	0	28.0816	2.0154	0	0	0	4	0	0.55	0.52	0.16
1440	58	2	2	71	155	1	3	1	0	0	51.7	117.017	61.9	1	0	0	1	0	0	0	0	0	29.5525	1.7014	0	0	0	1	0	0.73	0.47	0.275
1441	75	1	2	55	155	2	3	1	1	1	51.5	72.1331	63	3	0	0	0	0	0	0	0	0	22.8928	1.4966	0	0	0	4	0	2.67	2.09	1.503
1442	59	2	1	75	173	1	3	1	0	0	123	60.3793	25.9	3	0	0	1	0	0	0	1	0	25.0593	1.8624	0	0	0	5	1	1.21	0.52	0.442
1443	58	2	1	70	165	2	1	0	0	0	75.7	92.6964	63.6	1	0	0	0	0	0	0	0	0	25.7117	1.7496	0	0	0	2	0	0.75	0.32	0.672
1444	71	1	2	50	155	4	1	1	0	0	68.2	52.5654	55.1	3	0	0	1	0	0	0	0	0	20.8117	1.4326	0	0	0	3	0	1.25	1.47	0.928
1445	64	2	1	67	170	3	1	1	0	0	122.4	50.8573	65	3	0	0	1	0	0	0	1	0	23.1834	1.7417	0	0	0	3	0	1.28	0.68	0.573
1446	51	2	1	70	170	2	1	1	1	0	84.3	90.3456	64.4	3	0	0	1	0	0	0	1	0	24.2215	1.7801	0	0	0	5	0	0.86	0.56	0.481
1447	73	1	1	75	167	2	1	1	0	0	60.1	102.214	58	3	0	0	0	0	0	0	0	0	26.8923	1.8258	0	0	0	3	0	1.21	0.7	0.63
1448	69	2	1	64	165	3	2	1	0	0	73.4	75.6814	54.4	3	0	0	0	0	0	0	0	0	23.5078	1.6728	0	0	0	5	0	2.82	1.49	1.52
1449	65	2	1	84	175	3	1	1	0	0	96.9	79.481	64.4	3	0	0	0	0	0	0	1	0	27.4286	1.9898	0	0	0	4	0	0.95	0.53	0.586
1450	56	2	2	70	170	2	2	1	0	0	57.4	106.446	57	3	0	0	0	0	0	0	0	0	24.2215	1.7801	0	0	0	3	0	0.69	0.52	0.599
1451	65	2	2	71	160	2	2	1	1	0	81.8	67.6444	69	3	0	0	0	0	0	0	1	0	27.7344	1.7319	0	0	0	4	0	1.7	1.27	1.125
1452	70	1	1	60	173	2	1	1	0	0	233.6	21.9798	66.9	2	0	0	0	0	0	0	0	0	20.0474	1.6704	1	0	1	2	0	1.72	7.64	1.882
1453	58	2	1	69	168	2	2	0	0	0	64.3	107.572	64.4	3	0	0	0	0	0	0	0	0	24.4473	1.7551	0	0	0	3	0	0.81	0.7	0.393
1454	62	2	2	52	148	1	2	1	0	0	53.3	79.0745	69.2	3	0	0	0	0	0	0	1	0	23.74	1.4155	0	0	0	5	0	1.65	1.19	0.847
1455	76	1	1	72	165	2	1	1	1	0	86.1	65.4269	64.7	3	0	0	0	0	0	0	0	0	26.4463	1.7752	0	0	1	4	0	2.1	1.29	0.758
1456	82	1	1	57	160	1	1	0	0	0	62.5	64.665	65.4	3	0	0	0	0	0	0	0	0	22.2656	1.5527	0	0	0	5	0	3.17	1.17	2.285
1457	68	2	1	78	170	1	1	1	1	0	92.1	74.5443	60	3	0	0	0	0	0	0	0	0	26.9896	1.8825	0	0	0	5	0	1.47	0.75	0.543
1458	66	2	1	73	170	2	2	1	1	0	89.3	73.952	63.7	3	0	0	0	0	0	1	0	0	25.2595	1.8185	0	0	0	5	0	1.51	0.53	0.336
1459	78	1	1	78	168	2	2	1	0	0	71	83.2673	65.8	3	0	0	0	0	0	0	1	0	27.6361	1.8703	0	0	0	4	0	1.43	0.67	0.69
1460	52	2	1	64	170	1	1	0	0	0	69.2	99.4955	64	3	0	0	0	0	0	0	1	0	22.1453	1.7033	0	0	0	4	0	0.59	0.74	0.292
1461	81	1	1	74	170	3	2	0	0	0	127	42.0268	65.4	1	0	0	0	0	0	0	1	0	25.6055	1.8313	0	0	0	1	0	2.47	0.74	1.087
1462	69	2	1	60	168	1	1	1	1	0	62.1	83.8619	56.8	3	0	0	0	0	0	0	1	0	21.2585	1.6399	0	0	0	4	0	1.26	1.64	0.752
1463	66	2	1	84	170	2	1	1	1	0	94.4	80.4981	35.2	3	0	0	0	0	0	0	0	0	29.0657	1.9593	0	0	0	4	0	1.59	0.49	0.76
1464	62	2	1	67	160	1	2	0	1	0	46.1	138.585	63	1	0	0	0	0	0	0	1	0	26.1719	1.6807	0	0	0	2	0	0.95	0.49	0.329
1465	58	2	1	79	176	2	2	1	1	0	61.7	128.352	49.4	3	0	0	0	0	0	0	0	0	25.5036	1.9319	0	0	0	5	0	0.76	0.54	0.336
1466	65	2	2	55	157	2	2	1	0	0	57.7	74.2872	67.4	3	0	0	0	0	0	0	1	0	22.3133	1.5088	0	0	0	4	0	1.98	1.54	1.32
1467	49	2	1	90	166	2	2	1	0	0	102.2	97.967	67.8	3	0	0	0	0	0	0	0	0	32.6608	2.0117	0	1	0	6	0	0.69	0.98	0.303
1468	60	2	1	68	166	2	2	1	1	0	109.6	60.6785	50.3	3	0	0	0	0	0	0	0	0	24.677	1.7301	0	0	0	4	0	0.96	0.64	0.387
1469	59	2	2	76.5	163	2	2	1	0	0	76.8	83.8399	62.1	3	0	0	0	0	0	0	1	0	28.793	1.8206	0	0	0	4	0	0.8	0.79	0.414
1470	62	2	1	58	170	1	1	0	0	0	93.1	59.4045	45.9	3	0	0	0	0	0	0	0	0	20.0692	1.6265	0	0	0	5	0	1.21	0.36	0.568
1471	55	2	1	75	170	1	2	1	1	0	88.5	88.061	61.7	3	0	0	0	0	0	0	0	0	25.9516	1.8441	0	0	0	4	0	0.92	0.75	0.42
1472	70	1	2	56	160	2	2	1	0	0	62.4	65.278	50.9	3	0	0	0	0	0	0	1	1	21.875	1.5399	0	0	0	5	0	2.22	0.86	1.131
1473	71	1	2	51	163	1	2	0	0	0	53.6	68.2213	65.2	3	0	0	0	0	0	0	0	0	19.1953	1.4942	0	0	0	4	0	1.93	1.09	1.132
1474	73	1	1	65	158	1	2	1	0	0	61.8	86.1482	50.5	3	0	0	0	0	0	0	1	0	26.0375	1.6429	0	0	0	6	0	2.54	0.93	1.189
1475	68	2	1	61	166	2	2	0	1	0	60.1	89.3377	63.3	3	0	0	0	0	0	0	0	1	22.1367	1.6405	0	0	0	3	0	3.09	0.52	0.251
1476	39	2	1	125	180	2	2	1	1	0	62.6	246.549	33.8	3	0	0	0	0	0	0	0	0	38.5802	2.5451	0	1	0	3	0	1.19	0.7	0.741
1477	75	1	1	59	167	1	2	0	0	0	64.5	72.6863	64	3	0	0	0	0	0	0	1	0	21.1553	1.621	0	0	0	2	0	1.81	0.34	1.063
1478	43	2	1	80	172	3	1	0	0	0	73.1	129.775	54	3	0	0	0	0	0	0	0	0	27.0416	1.9203	0	0	0	5	0	0.55	0.34	0.21
1479	75	1	1	70	162	3	2	1	0	0	78.3	71.0389	68	3	0	0	0	0	0	0	1	0	26.6728	1.7313	0	0	0	4	0	2.05	0.61	1.191
1480	68	2	2	72	170	3	2	1	0	0	47.4	113.646	68	1	0	0	0	0	0	0	0	0	24.9135	1.8057	0	0	0	1	0	1.49	0.82	0.999
1481	76	1	1	58	160	2	2	0	1	0	60	75.6316	63.3	3	0	0	0	0	0	0	1	0	22.6562	1.5655	0	0	0	4	0	0.69	0.23	0.438
1482	53	2	1	75	173	2	2	0	0	0	61.7	129.283	63.4	3	0	0	0	0	0	0	0	0	25.0593	1.8624	0	0	0	4	0	0.68	0.46	0.361
1483	64	2	2	58	155	3	2	0	1	0	66.6	68.7754	53.6	3	0	0	0	0	0	0	0	1	24.1415	1.535	0	0	0	3	0	1.35	0.57	0.485
1484	59	2	2	58	160	2	2	0	1	0	76.9	63.4822	60.9	3	0	0	0	0	0	0	1	0	22.6562	1.5655	0	0	0	4	0	1.85	0.59	0.7
1485	67	2	1	86	175	3	2	1	0	0	65.5	117.173	64.7	3	0	2	0	0	0	0	0	0	28.0816	2.0154	0	0	0	4	1	1	4.75	0.693
1486	57	2	2	60	152	1	2	1	1	0	51.7	100.093	63.7	3	0	0	0	0	0	0	1	0	25.9695	1.5423	0	0	0	4	0	1.39	0.99	0.753
1487	54	2	2	52	156	2	2	1	1	0	51.5	90.2319	66.8	3	0	0	0	0	0	0	0	0	21.3675	1.4643	0	0	0	3	0	1.43	0.7	0.596
1488	42	2	1	80	170	2	1	1	0	1	71.5	134.047	50.9	3	0	0	0	0	0	0	0	0	27.6817	1.9081	0	0	0	5	0	0.65	0.68	0.218
1489	49	2	2	60	160	2	2	0	1	0	32.2	176.199	65.8	2	0	0	0	0	0	0	0	0	23.4375	1.5911	0	0	0	2	0	0.76	0.95	0.478
1490	51	2	1	80	175	2	2	0	0	0	73.5	118.424	66.9	3	0	0	0	0	0	0	1	0	26.1224	1.9386	0	0	0	4	0	0.69	0.42	0.307
1491	59	2	2	63	170	1	1	0	0	0	50.7	104.588	64.8	3	0	0	0	0	0	0	0	0	21.7993	1.6905	0	0	0	4	0	1.16	0.53	0.634
1492	72	1	1	70	170	2	2	1	1	0	59.8	97.3089	64.4	3	0	0	0	0	0	0	0	0	24.2215	1.7801	0	0	0	5	0	2.28	0.92	1.08
1493	67	2	1	81	170	1	2	1	0	0	60.4	119.679	62.1	3	0	0	0	0	0	0	1	0	28.0277	1.9209	0	0	0	4	0	1	0.47	0.476
1494	72	1	2	55	155	3	1	0	0	0	53.9	72.1022	63	3	0	0	0	0	0	0	1	0	22.8928	1.4966	0	0	0	3	0	2.14	0.84	0.611
1495	64	2	1	70	178	2	2	0	0	0	57.7	112.715	66.9	3	0	0	0	0	0	0	0	0	22.0932	1.8289	0	0	0	4	0	1.66	0.71	0.638
1496	62	2	1	64.9	165	1	2	0	0	0	41.9	147.697	66.3	3	0	0	0	0	0	0	0	0	23.8384	1.68432	0	0	0	3	0	0.76	2.37	0.3
1497	77	1	1	70	165	1	2	1	1	0	92.9	58.0323	57	3	0	0	0	0	0	0	0	1	25.7117	1.7496	0	0	0	3	0	2.98	1.2	1.123
1498	63	2	1	68	163	1	1	1	0	1	77.1	83.0218	62.4	3	0	0	0	0	0	0	0	0	25.5937	1.7118	0	0	0	5	0	1.19	0.63	0.324
1499	66	2	1	65	165	2	2	1	0	0	70.1	83.883	67.9	3	0	0	0	0	0	0	1	0	23.8751	1.6856	0	0	0	5	0	1.36	0.73	0.697
1500	62	2	2	50	150	2	2	0	1	0	48.8	83.0444	63	3	0	0	0	0	0	0	1	0	22.2222	1.4021	0	0	0	5	0	2.03	0.78	0.971
1501	58	2	1	55	165	1	1	0	0	0	69.2	79.6741	37.3	3	0	0	0	3	0	0	1	0	20.202	1.5576	0	0	0	5	0	1.28	0.62	0.4
1502	62	2	2	64	160	2	2	1	0	0	77	67.3674	63	3	0	0	0	0	0	0	0	0	25	1.6423	0	0	0	5	0	1.28	0.44	0.547
1503	72	1	1	70	168	1	2	1	1	0	69.4	83.8483	63.7	3	0	0	0	0	0	0	1	0	24.8016	1.7679	0	0	0	5	0	1.82	1.19	0.97
1504	61	2	1	60	166	2	2	0	1	0	71.7	80.8176	64.4	3	0	0	0	0	0	0	0	0	21.7738	1.6277	0	0	0	3	0	1.28	0.9	0.541
1505	63	2	1	78	175	2	1	1	0	0	63.2	116.176	67.4	3	0	0	0	0	0	0	1	0	25.4694	1.913	0	0	0	4	0	0.79	0.43	0.299
1506	59	2	2	58	158	2	2	0	1	0	74.6	65.4395	54.4	3	0	0	0	0	0	0	0	0	23.2335	1.5533	0	0	0	4	0	1.6	0.8	0.965
1507	65	2	2	50	150	2	2	0	1	0	49.3	79.0406	59	3	0	0	0	0	0	0	1	0	22.2222	1.4021	0	0	0	4	0	1.61	1.29	0.993
1508	52	2	1	71	170	2	2	0	0	0	68.5	111.506	61.9	1	0	0	0	0	0	0	1	0	24.5675	1.7929	0	0	0	2	0	0.6	0.54	0.336
1509	69	2	1	75	165	2	2	1	1	0	61.7	105.507	65.4	3	1	0	0	0	0	0	1	0	27.5482	1.8136	0	0	1	4	0	1.26	1.55	0.927
1510	67	2	1	58	155	2	2	0	0	0	74.6	69.3839	58	3	0	0	0	0	0	0	1	0	24.1415	1.535	0	0	0	4	0	1.61	1.07	1.116
1511	59	2	2	55	158	2	2	0	0	0	46.4	99.7689	65.2	1	0	0	0	0	0	0	1	1	22.0317	1.5149	0	0	0	1	0	1.08	0.6	0.252
1512	58	2	1	60	170	2	2	1	1	0	93.9	64.054	64	3	0	0	0	0	0	0	0	0	20.7612	1.6521	0	0	0	4	0	0.76	0.54	0.421
1513	67	2	1	73	171	3	2	1	1	0	175.2	37.1842	43.7	3	0	0	0	0	0	0	0	0	24.9649	1.8246	0	0	0	5	0	2.1	3.24	1.598
1514	68	2	1	90	178	2	2	1	1	0	110.9	71.4316	67.9	3	0	0	0	0	0	0	1	0	28.4055	2.0849	0	0	0	4	0	1.34	0.39	0.568
1515	69	2	1	78	174	1	2	0	1	0	29.2	231.855	63	3	0	0	0	0	0	0	1	1	25.763	1.9069	0	0	0	4	0	0.98	0.47	0.317
1516	67	2	1	78	169	2	2	1	0	0	76	91.5905	63.6	3	0	0	0	0	1	0	0	0	27.31	1.8764	0	0	0	4	0	1.28	0.66	0.414
1517	61	2	1	68	169	1	2	1	0	0	72.9	90.0856	42.9	3	0	0	0	0	0	0	0	0	23.8087	1.7484	0	0	0	5	0	1.11	0.82	0.806
1518	53	2	1	58	164	1	1	1	0	0	104	59.3145	67.4	3	0	0	0	0	1	0	1	0	21.5645	1.5899	0	0	0	5	0	1.28	0.43	0.405
1519	64	2	1	69	165	2	2	0	0	0	67.7	94.6936	61.9	3	0	0	0	0	0	0	1	0	25.3444	1.7368	0	0	0	5	0	1.08	0.3	0.372
1520	46	2	1	95	168	1	2	1	0	0	80.4	135.782	66.9	3	0	0	0	0	0	0	0	0	33.6593	2.0879	0	1	0	5	0	0.6	0.42	0.527
1521	52	2	2	59	160	2	2	1	0	0	47.8	112.868	68.5	1	0	2	0	0	0	0	0	0	23.0469	1.5783	0	0	0	2	1	1.28	1.96	0.697
1522	56	2	1	83	170	1	1	1	0	0	79.7	106.941	66.9	3	0	0	0	0	0	0	0	0	28.7197	1.9465	0	0	0	5	0	0.65	0.44	0.188
1523	62	2	1	78	170	2	2	0	0	0	65.9	112.863	65.6	1	0	0	0	0	0	0	0	0	26.9896	1.8825	0	0	0	2	0	0.68	1.56	0.641
1524	67	2	1	62	165	1	2	1	0	1	73.4	75.3816	66.9	3	0	0	0	0	0	0	1	0	22.7732	1.6472	0	0	0	4	0	1.57	0.98	1.046
1525	64	2	1	74	175	2	2	1	1	1	158.2	43.4596	40.9	3	0	0	0	0	0	0	1	0	24.1633	1.8618	0	0	0	4	0	1.61	1.36	1.216
1526	65	2	1	68	170	1	2	1	1	0	70.9	87.9368	63.7	3	0	0	0	0	0	0	1	0	23.5294	1.7545	0	0	0	5	0	1.59	0.62	0.769
1527	63	2	1	60	160	2	1	1	0	0	81.6	69.2147	48.9	3	0	0	0	0	0	0	1	0	23.4375	1.5911	0	0	0	5	0	0.94	0.83	0.641
1528	58	2	1	72	168	3	2	1	1	0	413.7	17.4465	61.7	3	0	0	0	0	0	0	1	0	25.5102	1.7935	1	0	0	5	0	2.54	1.29	1.375
1529	78	1	1	62	165	2	1	1	0	0	92.2	50.9682	64	3	0	0	0	0	0	0	1	1	22.7732	1.6472	0	0	0	3	0	2.27	0.69	1.107
1530	70	1	1	70	170	3	1	1	1	0	57.4	104.359	63	3	0	0	0	1	0	0	0	0	24.2215	1.7801	0	0	1	3	1	2.59	1.06	3.148
1531	74	1	1	88	170	3	2	1	0	0	116.4	60.9987	65.2	3	0	0	0	0	0	0	1	1	30.4498	2.0105	0	1	0	3	0	1.86	1.17	1.182
1532	61	2	1	70	167	2	2	1	0	0	55.8	121.154	63.1	3	0	0	0	0	0	0	1	0	25.0995	1.7618	0	0	0	4	0	0.76	0.47	0.327
1533	71	1	1	60	168	2	1	0	0	0	162.4	31.1646	37.9	3	1	0	0	0	1	0	1	0	21.2585	1.6399	0	0	0	3	0	4.47	2.1	3.492
1534	70	1	2	58	150	3	2	1	0	0	42.5	99.2665	33.7	3	0	0	0	0	0	0	1	1	25.7778	1.5045	0	0	1	4	0	2.61	4.73	2.51
1535	62	2	1	60	168	2	1	1	0	0	74.6	76.6926	62.4	3	0	0	0	0	0	0	1	0	21.2585	1.6399	0	0	0	4	0	0.99	0.61	0.93
1536	60	2	2	56	160	2	1	1	1	0	54.2	85.8903	63.3	3	0	0	0	0	0	0	0	0	21.875	1.5399	0	0	0	3	0	0.86	0.58	0.758
1537	57	2	1	83	175	2	2	1	0	0	64.7	130.166	51.3	3	0	0	0	0	0	0	1	0	27.102	1.977	0	0	0	4	0	0.76	0.38	0.252
1538	55	2	1	72	160	1	2	0	0	0	73.1	102.348	63.7	3	0	0	0	0	0	0	1	0	28.125	1.7447	0	0	0	4	0	0.58	0.86	0.436
1539	76	1	1	56	167	2	1	0	0	0	94.1	46.5613	65.4	3	0	0	0	0	0	0	1	0	20.0796	1.5826	0	0	0	3	0	3.7	0.73	2.639
1540	40	2	1	72	165	1	2	1	0	0	72.8	120.906	67.5	3	0	0	0	0	0	0	1	0	26.4463	1.7752	0	0	0	5	0	0.69	2.1	0.263
1541	49	2	1	75	168	2	2	0	0	0	75.2	110.951	63	3	0	0	0	0	0	0	1	0	26.5731	1.8319	0	0	0	3	0	0.55	0.34	0.22
1542	50	2	1	82	170	3	2	1	0	0	76.6	117.781	64.4	3	0	0	0	0	0	0	1	1	28.3737	1.9337	0	0	0	3	0	0.53	0.59	0.487
1543	63	2	1	82	170	2	1	0	0	1	64.2	120.231	67.8	3	0	0	0	0	0	0	0	0	28.3737	1.9337	0	0	0	4	0	0.92	0.51	0.335
1544	62	2	2	60	163	3	2	0	0	0	42.3	114.966	63	3	0	0	0	0	0	0	0	0	22.5827	1.6094	0	0	0	3	0	1.24	0.62	0.627
1545	60	2	1	70	160	2	1	1	0	0	101.1	67.7148	61	3	0	0	0	0	0	0	1	0	27.3438	1.7191	0	0	0	3	0	0.88	0.65	0.409
1546	60	2	1	68	170	2	1	0	0	0	98	67.8609	35.8	3	0	0	0	0	0	0	0	0	23.5294	1.7545	0	0	0	3	0	0.76	0.49	0.278
1547	70	1	2	72	170	2	2	1	1	0	53.2	98.4429	57.5	3	0	0	0	0	0	0	1	0	24.9135	1.8057	0	0	0	3	0	1.7	0.59	1.216
1548	77	1	1	64	173	4	2	1	0	0	65.3	75.4838	64.7	3	0	0	0	0	0	0	1	0	21.3839	1.7216	0	0	0	3	0	1.95	0.92	1.039
1549	60	2	1	76	170	3	1	0	0	0	95.6	77.7486	44.4	3	0	0	0	0	0	1	1	0	26.2976	1.8569	0	0	0	4	0	0.58	0.42	0.157
1550	80	1	1	60	168	3	2	1	0	0	68.6	64.1542	61	3	0	0	0	0	0	0	1	0	21.2585	1.6399	0	0	1	3	0	1.9	1.05	1.258
1551	55	2	1	79	177	2	2	1	1	0	72.5	113.228	60.7	3	0	0	0	0	0	0	0	1	25.2163	1.938	0	0	0	5	0	0.69	0.41	0.359
1552	70	1	1	60	166	2	2	0	0	0	62.1	82.6807	63.6	3	0	0	0	0	0	0	1	0	21.7738	1.6277	0	0	0	4	0	1.26	0.62	2.734
1553	72	1	1	70	172	1	1	0	0	0	59.5	97.7995	61.9	3	0	0	0	0	0	0	1	0	23.6614	1.7923	0	0	0	3	0	1.29	0.64	0.489
1554	63	2	1	60	160	2	2	0	0	0	71.5	78.9919	44.5	3	0	0	0	0	0	0	1	0	23.4375	1.5911	0	0	0	4	0	1.47	0.91	0.732
1555	69	2	1	75	170	3	1	1	0	0	90.9	71.6147	48.1	3	0	0	0	0	0	0	0	0	25.9516	1.8441	0	0	0	4	0	1.23	0.82	0.936
1556	72	1	1	60	175	2	2	0	0	0	76.5	65.1997	64.4	3	0	0	0	0	0	0	0	0	19.5918	1.6826	0	0	0	4	0	1.64	0.77	1.021
1557	76	1	1	70	168	3	2	1	1	0	65.7	83.3603	66.8	3	0	0	0	0	0	0	1	0	24.8016	1.7679	0	0	0	5	0	1.8	0.41	0.805
1558	50	2	1	71	163	2	1	1	0	0	102.7	76.0636	42.2	3	0	0	0	0	0	0	0	0	26.7229	1.7502	0	0	0	4	0	0.95	0.24	0.281
1559	58	2	1	75	170	2	1	1	1	0	76.2	98.6658	62.1	3	0	0	0	0	0	0	1	0	25.9516	1.8441	0	0	0	4	0	0.55	0.38	0.255
1560	70	1	2	60	155	2	2	0	0	0	47.4	92.0739	60.1	3	0	0	0	0	0	0	0	0	24.974	1.5606	0	0	0	3	0	1.71	1.61	0.67
1561	62	2	1	64	168	2	2	0	0	0	69.7	87.5565	67.9	3	0	0	0	0	0	0	0	0	22.6757	1.6911	0	0	0	3	0	1.39	0.71	0.702
1562	68	2	2	52	160	2	1	0	0	0	58.2	66.8465	63.3	3	0	0	0	0	0	0	0	0	20.3125	1.4887	0	0	0	2	0	2.21	0.57	1.852
1563	58	2	1	68	170	3	1	0	0	0	94.2	72.3633	63.3	3	0	0	0	0	0	0	0	0	23.5294	1.7545	0	0	0	4	0	0.81	1.4	0.632
1564	74	1	2	49	155	3	1	0	0	0	61.2	54.9104	65.6	3	0	0	0	0	0	0	0	0	20.3954	1.4198	0	0	0	5	0	2.05	0.67	0.669
1565	50	2	1	60	160	3	1	0	0	0	52.6	125.503	45.4	3	0	1	0	1	0	0	0	0	23.4375	1.5911	0	0	0	3	1	0.62	3.28	0.179
1566	66	2	2	65	166	2	1	0	0	0	58.7	85.1476	60	3	0	0	0	0	0	0	0	0	23.5883	1.6917	0	0	0	5	0	1	0.47	0.575
1567	59	2	1	82	180	2	1	0	0	0	73.3	110.775	64.7	3	0	0	0	0	0	0	0	0	25.3086	1.9947	0	0	0	4	0	0.71	1.12	0.375
1568	65	2	1	78	172	2	1	0	0	0	90.5	79.0231	67.4	3	0	0	0	0	0	0	0	0	26.3656	1.8947	0	0	0	5	0	0.95	0.38	0.332
1569	62	2	1	93	170	2	2	0	0	0	88.4	100.316	62.4	1	0	0	0	0	0	0	0	0	32.1799	2.0745	0	1	0	1	0	0.85	0.18	0.384
1570	71	1	1	70	160	2	2	0	0	0	57	103.59	59.7	3	0	0	0	0	0	0	0	0	27.3438	1.7191	0	0	0	5	0	2.35	0.81	1.122
1571	69	2	1	70	168	3	1	0	0	1	73.3	82.8894	50.8	3	0	0	0	0	0	0	0	0	24.8016	1.7679	0	0	0	4	0	1.37	0.82	1.086
1572	83	1	1	61	160	2	2	0	0	0	70.9	59.9522	63.6	3	0	0	0	0	1	0	0	0	23.8281	1.6039	0	0	0	2	0	4.03	0.94	1.631
1573	55	2	1	74	171	2	1	0	0	0	59.8	128.587	65.8	3	0	0	0	0	0	0	0	0	25.3069	1.8374	0	0	0	3	0	0.83	0.71	0.558
1574	59	2	1	77	171	2	2	0	0	0	76.5	99.6692	64.7	3	0	0	0	0	0	0	1	0	26.3329	1.8758	0	0	0	4	0	0.76	0.55	0.252
1575	61	2	1	65	170	2	2	0	0	0	72.6	86.467	52.5	3	1	0	0	0	0	0	0	0	22.4913	1.7161	0	0	0	4	0	1.24	1.97	0.681
1576	67	2	1	78	173	2	2	0	0	0	91.2	76.3254	50.5	3	0	0	0	0	0	0	1	0	26.0617	1.9008	0	0	0	4	0	1.14	0.5	0.369
1577	63	2	1	65	165	2	2	0	0	0	79.7	76.7702	61.9	3	0	0	0	0	0	0	0	0	23.8751	1.6856	0	0	0	3	0	0.95	0.35	0.321
1578	60	2	1	64	170	1	1	0	0	0	79.7	78.5341	63.6	3	0	0	0	0	0	0	0	0	22.1453	1.7033	0	0	0	4	0	0.73	0.62	0.36
1579	70	1	1	61	160	2	2	0	0	0	79	66.0766	63.4	3	0	0	0	0	0	0	0	1	23.8281	1.6039	0	0	0	3	0	2.22	1.03	1.236
1580	69	2	1	62	166	2	1	0	1	0	60.9	88.3648	68	3	0	0	0	0	0	0	0	0	22.4996	1.6533	0	0	0	4	0	1.65	1.01	0.621
1581	76	1	2	61	160	2	1	0	0	0	62.3	65.116	69	3	0	0	0	0	0	0	0	1	23.8281	1.6039	0	0	0	4	0	3.21	2.88	1.542
1582	66	2	2	68	160	2	2	0	0	0	70.3	74.3791	63.6	3	0	0	0	0	0	0	1	0	26.5625	1.6935	0	0	0	4	0	1.28	0.66	0.469
1583	72	1	1	71	175	2	1	0	0	0	79.6	74.1482	62.7	3	0	0	0	0	0	0	0	1	23.1837	1.8234	0	0	0	2	0	1.83	0.74	0.376
1584	61	2	2	75	160	2	1	0	0	0	61.1	100.766	64.8	3	0	0	0	0	0	0	1	0	29.2969	1.7831	0	0	0	4	0	0.77	0.33	0.737
1585	74	1	1	75	170	2	1	0	1	0	74	81.7749	67.4	3	0	0	0	0	0	0	0	0	25.9516	1.8441	0	0	0	4	0	0.79	0.44	0.284
1586	62	2	2	63	170	2	1	0	0	0	67.2	75.9856	66.3	3	0	0	0	0	0	0	0	0	21.7993	1.6905	0	0	0	5	0	0.85	0.3	0.232
1587	47	2	1	60	175	1	1	0	0	0	78.8	86.5675	67.5	3	0	0	0	0	0	0	1	0	19.5918	1.6826	0	0	0	4	0	0.55	0.55	0.248
1588	72	1	1	70	170	3	1	0	1	0	103.5	56.2229	42.9	3	0	0	0	1	0	0	0	0	24.2215	1.7801	0	0	0	4	1	2.17	0.86	0.778
1589	81	1	1	73	175	2	1	0	0	0	82	64.2107	63	3	0	0	0	0	0	0	1	0	23.8367	1.849	0	0	0	3	0	1.56	0.56	0.758
1590	58	2	1	65	160	2	1	0	0	0	58.6	111.193	63.7	2	0	0	0	0	0	0	0	0	25.3906	1.6551	0	0	0	1	0	3.67	0.75	2.59
1591	63	2	1	65	165	2	1	0	0	0	68.7	89.0623	64.4	3	0	0	0	0	0	0	1	0	23.8751	1.6856	0	0	0	3	0	0.76	0.96	0.259
1592	53	2	1	75	170	2	1	0	0	0	77.4	103.059	66.9	3	0	1	0	0	0	0	0	1	25.9516	1.8441	0	0	1	4	1	2.29	6.12	1.933
1593	74	1	1	77	170	2	1	0	0	0	90.1	68.9535	35.1	3	0	1	1	3	0	0	0	0	26.6436	1.8697	0	0	1	4	1	1.37	1.24	0.876
1594	75	1	1	51	160	2	1	0	0	0	65.8	61.5892	66.8	3	0	1	1	0	1	0	0	0	19.9219	1.4759	0	0	1	5	1	1.89	12.42	1.495
1595	61	2	1	69	166	2	1	0	0	0	96.4	69.1267	52.2	3	1	1	0	0	0	0	0	0	25.0399	1.7429	0	0	1	5	1	1.57	1.12	1.224
1596	60	2	1	82	175	2	1	1	0	0	87.7	91.4431	63.7	3	0	1	0	0	0	0	0	0	26.7755	1.9642	0	0	0	5	1	0.7	0.62	0.595
1597	75	1	1	76	168	2	1	0	0	0	60.7	99.4913	62.4	3	0	1	0	0	0	0	0	0	26.9274	1.8447	0	0	0	4	1	2.17	0.97	0.963
1598	66	2	1	68	170	2	1	0	0	0	50.5	121.814	65.6	3	0	1	0	0	0	0	0	0	23.5294	1.7545	0	0	0	4	1	0.95	0.6	0.279
1599	68	2	1	60	176	3	1	1	0	0	67.7	78.0085	69.2	3	0	1	1	0	0	1	0	0	19.3698	1.6887	0	0	0	3	1	0.85	0.6	0.398
1600	77	1	1	57	163	2	1	1	0	0	85.5	51.3447	72.8	3	0	1	1	0	0	0	0	0	21.4536	1.571	0	0	0	3	1	1.94	1.35	1.267
1601	68	2	1	54	169	2	1	0	1	0	45.3	104.924	66.3	3	0	1	0	0	0	0	0	0	18.9069	1.5692	0	0	0	4	1	1.35	0.26	0.244
1602	63	2	1	70	168	2	1	0	0	0	65.7	100.293	63.3	3	0	1	0	0	0	0	0	0	24.8016	1.7679	0	0	0	5	1	0.92	0.97	0.479
1603	72	1	1	62	157	2	1	0	0	0	76	67.8162	63.4	3	0	1	0	0	0	0	0	0	25.1532	1.5984	0	0	0	5	1	1.78	1.33	1.086
1604	60	2	1	72	175	3	1	0	1	0	59.6	118.147	41.2	1	0	1	1	0	0	0	0	0	23.5102	1.8362	0	0	0	2	1	1.23	0.82	0.729
1605	76	1	1	75	172	2	1	0	0	0	83.9	69.9401	66	3	0	1	0	0	0	0	0	0	25.3515	1.8563	0	0	0	5	1	1.94	2.01	0.656
1606	75	1	2	64	163	3	1	0	0	0	60.4	71.5685	59.9	3	0	1	0	0	0	0	0	0	24.0882	1.6606	0	0	0	5	1	2.04	1.2	2.367
1607	58	2	1	54	160	2	1	0	1	0	60	90.22	64	3	0	1	0	0	0	0	0	0	21.0938	1.5143	0	0	0	5	1	1.08	0.47	0.391
1608	77	1	2	67	153	4	1	1	0	0	56.8	77.2205	67.4	1	0	1	0	0	0	0	0	0	28.6215	1.638	0	0	0	2	1	2.56	0.66	1.68
1609	65	2	1	71	170	2	1	0	0	0	91	71.536	63	3	0	1	0	0	0	0	0	1	24.5675	1.7929	0	0	0	5	1	2.46	2.53	1.092
1610	76	1	1	71	170	2	1	0	1	0	84.6	65.6621	50.8	3	0	1	0	0	0	0	0	0	24.5675	1.7929	0	0	0	3	1	1.95	1.12	1.303
1611	66	2	1	66	160	2	1	0	0	0	80.7	73.9859	63	3	0	1	0	0	1	0	0	0	25.7812	1.6679	0	0	0	4	1	1.32	1.91	0.822
1612	61	2	2	65	158	2	1	0	0	0	62.5	85.3741	64.4	1	0	1	0	0	0	0	0	0	26.0375	1.6429	0	0	0	1	1	0.95	0.19	0.224
1613	62	2	2	68	165	2	1	1	0	0	49	112.479	65.2	3	0	1	1	0	0	0	0	0	24.977	1.724	0	0	0	4	1	1.03	0.54	0.487
1614	71	1	1	74	175	2	1	0	1	0	107.3	58.1738	51.3	3	1	1	0	0	0	0	0	0	24.1633	1.8618	0	0	0	3	1	1.95	0.78	1.397
1615	70	1	1	50	160	2	1	1	0	0	62.7	68.2413	46.8	3	1	1	1	0	0	0	0	0	19.5312	1.4631	0	0	0	3	1	2.78	1.55	1.892
1616	54	2	1	62	167	2	1	0	1	0	67.4	96.7112	66.8	3	0	1	0	0	0	0	0	0	22.231	1.6594	0	0	0	5	1	0.69	0.56	0.218
1617	71	1	1	80	170	2	1	0	0	0	60.5	111.54	64.4	3	0	1	0	0	0	0	0	0	27.6817	1.9081	0	0	0	4	1	1.14	0.42	0.344
1618	52	2	1	97	175	2	1	0	1	0	72.9	143.144	53.6	3	0	1	0	0	0	0	0	0	31.6735	2.1562	0	1	0	4	1	0.5	0.32	0.214
1619	66	2	1	55	165	2	1	0	0	0	74.3	66.9657	62.4	3	0	1	0	0	0	0	0	0	20.202	1.5576	0	0	0	3	1	0.79	0.5	0.568
1620	59	2	1	80	178	2	1	0	0	0	71.9	110.177	67.5	1	0	2	0	0	0	0	0	0	25.2493	1.9569	0	0	0	2	1	0.97	3.7	1.379
1621	46	2	1	55	176	1	1	0	0	0	63.4	99.6892	64.4	1	0	1	1	0	0	0	0	0	17.7557	1.6247	0	0	0	2	1	0.62	0.63	0.422
1622	63	2	2	80	166	2	1	0	1	0	59.7	107.219	60.7	3	0	1	0	0	0	0	0	1	29.0318	1.8837	0	0	0	4	1	3.37	0.7	1.806
1623	63	2	1	86	177	2	1	1	0	0	104.5	77.4675	67.9	3	0	1	0	0	0	0	0	0	27.4506	2.0276	0	0	0	4	1	0.98	0.47	0.399
1624	42	2	1	60	158	3	1	0	0	0	65.1	110.419	60	3	0	1	1	0	0	0	0	0	24.0346	1.5789	0	0	0	5	1	0.87	0.66	0.345
1625	67	2	2	85	176	2	1	1	0	0	149	43.2734	59	3	0	1	0	0	0	0	0	0	27.4406	2.0087	0	0	1	4	1	2.05	1.12	1.488
1626	67	2	1	79	166	2	1	0	0	0	62.7	112.442	61.9	3	0	1	0	0	0	0	0	0	28.6689	1.8709	0	0	0	4	1	0.98	1.06	0.268
1627	65	2	2	57	158	2	1	1	0	0	79.8	55.6671	40.3	3	0	1	0	0	0	0	0	0	22.8329	1.5405	0	0	0	5	1	1.72	0.64	0.803
1628	65	2	2	60	150	2	1	0	0	0	59	79.2549	65.6	3	0	1	0	0	0	0	0	0	26.6667	1.5301	0	0	0	4	1	1.3	0.4	0.802
1629	54	2	1	83	167	2	1	0	0	0	82.1	106.287	68.7	3	0	1	0	0	0	0	0	0	29.7608	1.9282	0	0	0	3	1	0.65	0.25	0.219
1630	83	1	1	68	170	2	1	1	0	0	143.6	32.9971	62.4	3	0	1	0	0	0	0	0	0	23.5294	1.7545	0	0	0	2	1	4.14	0.98	2.466
1631	59	2	1	72	172	2	1	1	0	0	72.5	98.3391	66.3	3	0	1	0	0	0	0	0	0	24.3375	1.8179	0	0	0	5	1	0.72	1.05	0.312
1632	64	2	1	68	170	2	1	1	0	0	64.8	97.4977	57	3	1	1	0	0	0	0	0	0	23.5294	1.7545	0	0	0	4	1	0.95	0.31	0.266
1633	76	1	1	57	162	3	1	0	0	0	61.5	72.5148	64.4	3	0	1	0	0	0	0	0	0	21.7193	1.5649	0	0	0	3	1	1.71	0.8	1.192
1634	56	2	1	83	168	2	1	1	1	0	66.6	127.976	57	3	0	1	0	0	0	0	0	0	29.4076	1.9343	0	0	0	3	1	0.66	0.72	0.217
1635	71	1	1	78	177	2	1	0	0	0	81.1	81.1278	48.1	3	0	1	0	0	0	0	0	0	24.8971	1.9252	0	0	0	3	1	0.95	0.48	0.376
1636	54	2	1	84	176	2	1	1	1	0	71	124.384	38.4	3	0	0	0	0	0	0	0	0	27.1178	1.9959	0	0	0	4	0	0.71	0.42	0.302
1637	61	2	1	80	176	2	1	1	1	0	80.7	95.7393	59.6	3	0	0	0	0	0	0	0	0	25.8264	1.9447	0	0	0	5	0	0.74	0.65	0.612
1638	64	2	1	65	163	1	2	1	1	0	79.5	75.9638	64.4	3	0	0	0	0	0	0	0	0	24.4646	1.6734	0	0	0	4	0	1.2	1.07	1.034
1639	63	2	1	85	175	2	2	0	0	0	75.7	105.696	53.4	3	0	0	0	0	0	0	0	0	27.7551	2.0026	0	0	0	4	0	0.86	0.82	0.506
1640	61	2	1	80	168	1	2	0	0	0	62.9	122.832	60.6	3	0	0	0	0	0	0	0	0	28.3447	1.8959	0	0	0	5	0	0.79	0.52	0.208
1641	65	2	1	65	156	2	1	1	0	0	80.2	74.3099	63.3	3	0	0	1	0	0	0	0	0	26.7094	1.6307	0	0	0	4	0	1.25	0.51	1.147
1642	62	2	1	70	160	2	2	1	0	0	109.1	61.1807	63	3	0	0	0	0	0	0	0	0	27.3438	1.7191	0	0	0	3	0	1.27	1.11	1.482
1643	58	2	1	85	160	2	2	1	0	0	98.6	86.4177	71.9	3	0	0	0	0	0	0	0	0	33.2031	1.9111	0	1	0	4	0	0.86	0.56	0.702
1644	63	2	2	55	160	2	2	1	1	0	85.5	51.4699	67.5	3	0	0	0	0	0	1	0	0	21.4844	1.5271	0	0	0	2	0	1.84	1.01	1.029
1645	66	2	1	78	173	2	2	1	0	1	108.4	65.0944	64.7	3	0	0	0	0	0	0	0	0	26.0617	1.9008	0	0	0	4	0	1.37	0.36	0.744
1646	63	2	1	52	175	3	2	0	0	0	42.7	114.634	63	3	0	0	0	0	0	0	0	0	16.9796	1.5802	0	0	0	4	0	1.32	0.78	0.96
1647	76	1	1	63	165	2	1	0	1	0	75.1	65.6338	63	3	0	0	0	0	0	0	0	0	23.1405	1.66	0	0	0	4	0	1.94	0.54	0.939
1648	68	2	2	80	165	1	2	1	0	1	68.5	87.3771	63.7	3	0	0	0	0	0	0	0	0	29.3848	1.8776	0	0	0	4	0	1.64	0.57	0.784
1649	61	2	1	65	168	3	2	1	1	0	99.4	63.154	63.7	3	0	0	0	0	0	0	0	0	23.03	1.7039	0	0	0	4	0	1.1	0.58	0.565
1650	62	2	1	60	152	2	1	1	0	1	60.9	93.9453	62.7	3	0	0	0	0	0	0	0	0	25.9695	1.5423	0	0	0	5	0	1.32	0.79	0.667
1651	61	2	2	65	160	3	2	1	1	0	64.1	83.2431	33.8	3	0	0	0	0	0	0	0	0	25.3906	1.6551	0	0	0	4	0	1.79	0.63	1.045
1652	63	2	2	58	156	2	1	1	1	0	60.2	77.0882	63.3	3	0	0	0	0	0	0	0	0	23.833	1.5411	0	0	0	4	0	1.33	0.46	0.859
1653	72	1	1	70	170	2	1	1	0	0	79.2	73.4731	59	3	0	0	1	0	0	0	0	0	24.2215	1.7801	0	0	0	4	0	1.7	1.18	0.681
1654	67	2	1	68	166	3	1	0	0	0	66.4	91.3925	65.2	3	0	0	0	0	0	0	0	0	24.677	1.7301	0	0	0	5	0	1.14	0.5	0.536
1655	61	2	1	61.5	165	1	2	1	0	0	83.4	71.2169	62.1	3	0	0	1	0	0	0	0	0	22.5895	1.6408	0	0	0	3	0	0.78	0.74	0.445
1656	59	2	1	70	170	2	2	1	0	0	65.1	106.475	42.9	3	0	0	0	0	1	0	1	1	24.2215	1.7801	0	0	0	3	0	1.03	0.87	0.63
1657	76	1	1	73	170	2	1	1	1	0	75.1	76.0518	66.3	3	0	0	0	1	0	0	1	0	25.2595	1.8185	0	0	0	3	1	5.68	15.35	14.398
1658	78	1	1	83	170	3	3	1	0	1	89.2	70.5264	66.4	3	0	0	0	0	1	0	0	0	28.7197	1.9465	0	0	0	3	0	2.6	4	1.596
1659	62	2	1	67.5	165	2	2	1	0	0	75.5	85.2507	61	3	0	0	0	0	0	0	0	0	24.7934	1.7176	0	0	0	3	0	0.82	0.65	0.47
1660	69	2	1	65	178	2	1	0	1	0	58.5	96.4412	41.8	3	0	0	0	0	0	0	0	0	20.5151	1.7649	0	0	0	3	0	1.6	0.72	0.824
1661	63	2	1	60	162	2	2	1	0	0	56.3	100.318	65.2	3	0	0	0	0	0	0	0	0	22.8624	1.6033	0	0	0	3	0	1.09	0.86	0.589
1662	38	2	1	72	175	2	2	1	0	0	118.2	75.956	62.4	3	0	0	0	0	0	0	1	1	23.5102	1.8362	0	0	0	3	0	0.79	0.47	0.312
1663	62	2	2	55	155	1	3	1	0	0	56.4	79.0394	67.4	3	0	0	0	0	0	0	0	0	22.8928	1.4966	0	0	0	3	0	1.43	0.68	0.776
1664	72	1	1	62	168	2	2	1	1	0	67.9	75.9062	61	3	0	0	0	2	0	0	0	0	21.9671	1.6655	0	0	1	3	0	1.86	7.82	4.58
1665	69	2	1	65	170	2	2	0	0	0	82.4	68.4686	58	3	0	0	1	0	0	0	0	0	22.4913	1.7161	0	0	0	3	0	1.72	2.05	0.728
1666	52	2	1	70	173	1	3	1	1	0	105.8	71.1773	63.3	3	0	0	0	0	0	0	0	0	23.3887	1.7984	0	0	0	3	0	0.83	0.56	0.495
1667	76	1	2	50	153	2	3	1	1	1	47.1	83.0569	65.4	3	0	0	0	0	0	0	0	0	21.3593	1.4204	0	0	0	3	0	2.41	24.03	36.358
1668	66	2	1	53	170	3	2	1	0	0	74	64.7922	57.9	3	0	0	1	0	0	0	0	0	18.3391	1.5625	0	0	0	3	0	1.33	6.12	5.984
1669	61	2	1	59	168	1	3	0	1	0	70	81.4006	64.4	2	0	0	0	0	0	0	0	0	20.9042	1.6271	0	0	0	2	0	0.95	0.42	0.286
1670	67	2	1	73	169	3	2	1	0	0	125.7	51.8271	67.9	3	0	0	1	0	0	0	0	0	25.5593	1.8124	0	0	0	3	0	1.62	0.81	1.943
1671	81	1	1	68	178	2	2	0	0	0	75.8	64.7051	61.9	3	0	0	1	0	0	0	1	0	21.4619	1.8033	0	0	0	3	0	2.22	0.72	2.195
1672	64	2	1	67	168	2	2	0	0	0	62.4	99.7586	41.5	2	0	0	1	0	0	1	1	0	23.7387	1.7295	0	0	0	2	0	1.05	0.71	0.473
1673	64	2	1	64.5	167	2	2	1	0	0	57.6	104.039	48.9	3	0	0	1	0	0	0	0	0	23.1274	1.6914	0	0	0	3	0	1.12	0.63	0.792
1674	66	2	1	80	178	2	2	0	1	0	73.8	98.0646	63.4	3	0	0	1	0	0	0	0	0	25.2493	1.9569	0	0	0	3	0	0.99	0.48	0.372
1675	58	2	1	77	170	2	2	1	0	0	82.8	93.2225	63.4	2	0	0	1	0	0	0	0	0	26.6436	1.8697	0	0	0	2	0	0.69	2.14	5.587
1676	69	2	1	63	167	2	1	1	0	0	106.9	51.1526	63.3	3	0	0	1	0	0	0	0	0	22.5896	1.6722	0	0	0	3	0	1.28	0.35	0.515
1677	70	1	1	70	162	3	2	1	0	0	76.3	78.5088	61.7	3	0	0	1	0	0	0	0	0	26.6728	1.7313	0	0	0	3	0	1.79	0.85	0.905
1678	45	2	1	90	182	2	1	1	0	0	82.7	126.388	64.4	3	0	0	0	0	0	0	0	0	27.1706	2.1093	0	0	0	3	0	0.55	0.65	0.296
1679	69	2	1	78	180	2	2	0	1	0	84.3	80.3105	61.9	3	0	0	1	0	0	0	1	1	24.0741	1.9435	0	0	0	3	0	1.18	0.38	0.466
1680	68	2	1	66	168	2	2	0	0	0	89.4	64.9809	62.1	3	1	0	1	0	0	0	1	0	23.3844	1.7167	0	0	0	3	0	1.79	0.68	0.895
1681	64	2	1	70	176	2	2	1	0	0	64.8	100.365	51.3	3	0	0	1	0	0	0	0	0	22.5981	1.8167	0	0	0	3	0	0.95	0.57	0.55
1682	72	1	1	80	180	2	2	1	1	0	69.6	95.5512	64	3	0	0	1	0	0	0	0	0	24.6914	1.9691	0	0	0	3	0	1.29	0.83	1.156
1683	61	2	1	71	163	2	2	1	1	0	90.3	75.9354	64.4	2	0	0	1	0	0	0	0	0	26.7229	1.7502	0	0	0	2	0	0.88	0.52	0.552
1684	74	1	1	65	170	1	1	0	0	0	86.7	60.4902	65.6	3	0	0	1	0	0	0	0	0	22.4913	1.7161	0	0	0	3	0	1.34	1.52	1.159
1685	64	2	1	75	161	1	1	1	0	0	106.7	65.3066	65.4	2	0	0	0	0	0	0	0	0	28.9341	1.7892	0	0	0	2	0	1.01	0.47	0.683
1686	75	1	2	67	158	3	1	1	0	0	94.5	47.8875	64.7	3	0	0	1	0	0	0	0	0	26.8386	1.6685	0	0	0	3	0	1.56	0.67	0.691
1687	76	1	1	80	162	2	2	1	0	0	59.8	104.668	59.9	2	0	0	1	0	1	1	0	1	30.4832	1.8593	0	1	0	2	0	3.91	30.59	28.657
1688	70	1	1	74	165	2	2	1	0	0	90.8	69.7414	61.7	3	0	0	1	0	0	0	0	0	27.1809	1.8008	0	0	0	3	0	1.24	4.48	4.62
1689	74	1	1	67	155	3	2	1	0	0	82.5	65.5257	41.6	3	0	0	1	0	0	0	1	0	27.8876	1.6502	0	0	0	3	0	2.18	4.98	1.493
1690	64	2	1	70	169	2	1	1	1	0	63.5	102.42	63	3	0	0	1	0	0	0	0	0	24.5089	1.774	0	0	0	3	0	0.88	2.7	1.262
1691	73	1	2	50	168	2	2	1	0	0	61.7	56.419	68.5	3	0	0	1	0	0	0	0	0	17.7154	1.5119	0	0	0	3	0	1.68	0.59	3.54
1692	61	2	2	70	151	2	2	1	0	0	59.5	96.577	66.8	3	0	0	1	0	1	0	0	0	30.7004	1.6642	0	1	0	3	0	1.07	4.73	1.607
1693	63	2	1	75	175	2	2	1	0	0	68.8	102.615	63.7	3	0	0	1	0	0	0	0	0	24.4898	1.8746	0	0	0	3	0	0.75	10.01	3.012
1694	76	1	2	60	153	3	2	1	1	1	77.6	60.4945	66.4	3	0	0	1	0	0	0	0	0	25.6312	1.5484	0	0	0	3	0	2.5	0.9	7.014
1695	62	2	1	67	170	3	3	1	1	0	68.8	92.8598	46.8	3	0	0	1	0	0	0	2	0	23.1834	1.7417	0	0	0	3	0	1.65	3.08	3.393
1696	68	2	1	56	162	1	2	1	0	0	114.3	43.1242	64.4	3	0	0	1	0	0	0	1	0	21.3382	1.5521	0	0	0	3	0	2.17	1.28	8.577
1697	71	1	1	50	164	3	2	1	0	0	74.6	56.5362	44.5	3	0	0	1	0	0	0	1	0	18.5901	1.4875	0	0	0	3	0	2.49	15.16	10.347
1698	68	2	1	67	165	3	1	1	0	0	60	98.2885	46.6	3	0	0	1	0	0	0	0	0	24.6097	1.7112	0	0	0	3	0	3.13	0.87	0.631
1699	76	1	1	73	165	2	1	1	1	0	75.1	76.0518	66.3	3	0	0	0	0	0	0	0	0	26.8136	1.788	0	0	0	3	0	1.42	0.87	1.183
1700	60	2	1	74	170	2	2	1	1	0	98.8	73.2506	45.8	3	0	0	1	0	0	0	1	0	25.6055	1.8313	0	0	0	3	0	1.52	1.29	0.579
1701	74	1	1	66	168	3	2	1	0	0	71.4	74.5824	56.7	3	0	0	0	0	1	0	0	0	23.3844	1.7167	0	0	0	3	0	2.01	2.37	0.967
1702	60	2	2	60	156	2	2	1	1	1	94	53.0614	63	3	1	0	0	0	1	0	0	0	24.6548	1.5667	0	0	0	3	0	3.34	1.73	1.273
1703	64	2	1	59	170	2	2	1	1	0	92	59.5833	50	2	0	0	0	0	0	0	0	1	20.4152	1.6393	0	0	0	2	0	4.25	2.24	0.63
1704	63	2	1	68	170	2	2	1	0	0	78	82.0638	61	3	0	0	0	0	0	0	0	0	23.5294	1.7545	0	0	0	3	0	1.11	0.67	0.42
1705	66	2	1	72	165	1	3	0	0	0	67	97.2156	50	3	0	0	0	0	0	1	0	0	26.4463	1.7752	0	0	0	3	0	0.94	1.02	0.781
1706	69	2	2	60	160	2	2	0	0	0	48	92.2219	45	3	0	0	0	0	0	0	0	0	23.4375	1.5911	0	0	0	3	0	1.22	0.81	0.757
1707	66	2	2	65	158	2	2	0	0	0	79	63.2679	60	3	0	0	0	0	0	0	0	0	26.0375	1.6429	0	0	0	3	0	1.39	0.78	0.736
1708	58	2	2	50	151	2	2	1	1	0	49	86.9468	56	3	0	0	0	0	0	0	0	0	21.9289	1.4082	0	0	0	3	0	1.22	0.41	0.867
1709	63	2	1	59	170	2	2	1	1	0	62	89.5773	55	3	0	0	0	0	0	0	0	0	20.4152	1.6393	0	0	0	3	0	1.07	0.62	0.63
1710	66	2	2	80	160	2	2	1	1	0	52	118.3	56	3	0	0	0	0	0	0	0	0	31.25	1.8471	0	1	0	3	0	1.45	0.57	0.784
1711	57	2	1	79	172	2	1	1	0	1	47	170.551	40	3	0	0	0	0	0	0	0	0	26.7036	1.9075	0	0	0	3	0	0.76	0.6	0.348
1712	63	2	1	64	170	3	3	0	1	0	63	95.6262	52	3	0	0	0	0	0	1	0	0	22.1453	1.7033	0	0	0	3	0	0.85	0.82	0.862
1713	53	2	1	78	174	2	2	1	1	0	61	135.997	60	3	0	0	0	0	0	0	0	1	25.763	1.9069	0	0	0	3	0	2.09	0.7	0.303
1714	53	2	1	78	173	2	2	1	0	0	71	116.843	66	3	0	0	0	0	0	0	0	0	26.0617	1.9008	0	0	0	3	0	0.69	3.1	0.239
1715	63	2	2	57	156	2	2	0	1	0	53	86.0509	67	3	0	0	0	0	0	0	0	0	23.4221	1.5283	0	0	0	3	0	1.33	0.2	0.637
1716	52	2	2	76	160	3	2	0	0	0	62	112.091	65	3	0	0	0	0	0	0	0	0	29.6875	1.7959	0	0	0	3	0	1.04	0.38	0.342
1717	65	2	1	66	170	4	2	1	0	0	54	112.062	43	3	0	0	0	2	0	0	0	0	22.8374	1.7289	0	0	1	3	0	1.7	0.82	0.528
1718	74	1	1	85	173	1	2	1	0	1	80	85.7274	63	3	0	0	0	0	0	0	0	0	28.4005	1.9904	0	0	0	3	0	0.92	0.96	0.894
1719	56	2	1	73	170	2	2	1	0	0	80	93.7042	57	3	0	0	0	0	0	0	0	0	25.2595	1.8185	0	0	0	3	0	0.69	0.6	0.289
1720	77	1	1	80	175	1	2	1	1	1	70	88.0196	70	3	0	0	0	0	0	0	0	0	26.1224	1.9386	0	0	0	3	0	1.01	0.75	1.392
1721	70	1	1	57	170	2	2	0	0	0	57	85.5746	42	3	0	0	0	0	0	0	0	0	19.7232	1.6137	0	0	0	3	0	1.25	1.06	0.893
1722	45	2	1	60	170	2	2	0	0	0	64	108.878	62	2	0	0	0	0	0	0	0	1	20.7612	1.6521	0	0	0	2	0	2.09	0.52	0.396
1723	65	2	1	67	170	3	2	0	1	0	68	90.3387	45	3	0	0	0	0	0	0	0	0	23.1834	1.7417	0	0	0	3	0	1.31	0.97	0.67
1724	66	2	1	65	171	1	3	0	0	0	69	85.2202	58	3	0	0	0	0	0	0	0	0	22.2291	1.7222	0	0	0	3	0	0.69	0.7	0.578
1725	73	1	1	68	170	2	2	1	1	0	59	94.4014	60	3	0	0	0	0	0	0	0	0	23.5294	1.7545	0	0	0	3	0	1	0.73	0.97
1726	68	2	1	90	180	2	2	0	0	0	66	120.027	57	3	0	0	0	0	0	0	0	1	27.7778	2.0971	0	0	0	3	0	2.61	0.49	0.448
1727	79	1	1	68	170	1	2	1	1	0	78	65.0116	56	3	0	0	0	0	0	0	0	1	23.5294	1.7545	0	0	0	3	0	4.27	2.57	1.461
1728	70	1	2	50	160	2	2	1	0	0	67	54.2824	56	3	0	0	0	0	0	1	0	0	19.5312	1.4631	0	0	0	3	0	1.54	0.83	1.619
1729	76	1	2	58	168	2	2	1	0	0	99	38.9617	65	3	0	0	0	0	0	0	0	1	20.5499	1.6143	0	0	0	3	0	9.01	2.49	1.577
1730	65	2	2	56	156	2	1	1	0	1	148	29.4885	62	3	0	0	0	0	0	0	0	0	23.0112	1.5155	0	0	0	3	0	1.86	2.09	1.912
1731	78	1	2	65	156	3	2	1	0	0	56	74.7795	59	3	0	0	0	0	0	0	0	0	26.7094	1.6307	0	0	0	3	0	2.32	0.85	1.491
1732	73	1	1	67	170	2	2	1	0	0	101	54.3344	65	3	0	0	0	0	0	0	0	0	23.1834	1.7417	0	0	0	3	0	1.35	1.22	0.933
1733	68	2	1	65	170	2	2	1	0	0	99	57.7906	65	3	0	0	0	0	0	0	0	0	22.4913	1.7161	0	0	0	3	0	1.17	0.99	0.689
1734	57	2	2	68	170	1	1	1	0	1	66	88.8605	65	3	0	0	0	0	0	0	0	0	23.5294	1.7545	0	0	0	3	0	0.62	0.4	0.524
1735	63	2	1	52	168	1	2	0	0	0	59	82.9638	65	3	0	0	0	0	0	0	0	0	18.424	1.5375	0	0	0	3	0	0.92	0.44	0.601
1736	56	2	1	65	160	2	2	1	0	0	61	109.423	65	3	0	0	0	0	0	0	0	0	25.3906	1.6551	0	0	0	3	0	0.69	0.35	0.359
1737	65	2	1	56	170	2	2	0	1	0	53	96.8769	69	3	0	0	0	0	0	0	0	0	19.3772	1.6009	0	0	0	3	0	1.13	0.38	0.752
1738	57	2	1	50	170	3	2	1	0	1	69	73.5268	67	3	0	0	0	0	0	0	0	0	17.301	1.5241	0	0	0	3	0	1.13	0.39	0.629
1739	77	1	2	62	162	2	2	1	0	0	36	112.744	56	3	0	0	0	0	0	1	0	0	23.6244	1.6289	0	0	0	3	0	1.39	1.57	1.825
1740	82	1	2	60	160	3	2	0	0	0	96	37.6681	65	3	0	0	0	0	0	0	0	0	23.4375	1.5911	0	0	0	3	0	4.43	1.55	2.289
1741	67	2	1	56	166	2	2	1	1	0	60	83.2926	65	3	0	0	0	0	0	0	0	0	20.3223	1.5765	0	0	0	3	0	1.62	0.52	0.92
1742	58	2	1	65	158	2	2	1	0	1	71	91.7731	75	3	0	0	0	0	0	0	0	1	26.0375	1.6429	0	0	0	3	0	2.09	0.64	0.526
1743	74	1	1	60	172	2	2	1	0	1	187	25.8881	65	3	0	0	0	0	0	0	0	0	20.2812	1.6643	0	0	0	3	0	2.39	4.72	2.025
1744	67	2	1	51	164	1	2	0	1	0	73	62.3472	66	3	0	0	0	0	0	0	0	0	18.9619	1.5003	0	0	0	3	0	1.02	0.62	1.274
1745	74	1	1	83	172	2	1	1	1	0	171	39.1627	46	3	0	0	0	0	0	0	0	0	28.0557	1.9587	0	0	0	3	0	4.57	6.17	1.856
1746	65	2	1	52	172	1	1	0	0	0	56	85.138	61	3	0	0	0	0	0	0	0	0	17.5771	1.5619	0	0	0	3	0	0.57	0.51	0.359
1747	66	2	1	70	175	2	2	1	0	0	73	86.7468	56	3	0	0	0	0	0	0	0	0	22.8571	1.8106	0	0	0	3	0	0.82	0.79	0.517
1748	50	2	1	102	182	2	2	1	0	0	70	160.321	58	3	0	0	0	0	0	0	0	0	30.7934	2.2629	0	1	0	3	0	0.69	0.4	0.239
1749	58	2	1	70	172	2	2	0	0	0	63	111.383	63	3	0	0	0	0	0	0	0	0	23.6614	1.7923	0	0	0	3	0	0.69	0.42	0.245
1750	65	2	1	80	165	2	2	1	0	0	82	89.4508	67	3	0	0	0	0	0	0	0	1	29.3848	1.8776	0	0	0	3	0	2.4	1.23	0.482
1751	71	1	1	70	167	2	2	1	0	0	89	66.3443	61	3	0	0	0	0	0	0	0	0	25.0995	1.7618	0	0	0	3	0	1.28	1.06	0.573
1752	51	2	1	70	161	2	3	1	1	0	71	107.27	54	3	0	0	0	0	0	0	0	0	27.0051	1.7252	0	0	0	3	0	0.65	0.57	0.366
1753	62	2	1	94	175	2	1	0	0	1	66	135.808	62	3	0	0	0	0	0	0	0	0	30.6939	2.1178	0	1	0	3	0	0.59	0.52	0.405
1754	64	2	1	81	175	2	1	0	0	0	81	92.9095	61	3	0	0	0	0	0	0	0	0	26.449	1.9514	0	0	0	3	0	0.62	0.73	0.272
1755	63	2	1	82	178	2	2	1	0	0	64	120.607	49	3	0	0	0	0	0	0	0	0	25.8806	1.9825	0	0	0	3	0	1.03	0.76	0.38
1756	52	2	1	75	174	3	2	1	1	1	47	171.669	64	3	0	0	0	0	0	0	0	1	24.7721	1.8685	0	0	0	3	0	2.51	0.49	0.427
1757	57	2	1	65	170	2	2	1	1	0	79	83.4855	64	3	0	0	0	0	0	0	0	0	22.4913	1.7161	1	0	0	3	0	0.94	0.5	0.355
1758	65	2	2	55	156	2	1	1	1	0	57	75.1995	51	3	0	0	0	0	0	0	0	1	22.6003	1.5027	0	0	0	3	0	3.22	1.31	1.045
1759	69	2	2	52	159	2	2	1	0	0	56	68.5077	61	3	0	0	0	0	0	0	0	0	20.5688	1.4826	0	0	0	3	0	1.5	0.58	1.182
1760	59	2	1	74	171	1	2	0	0	0	66	111.025	68	3	0	0	0	0	0	0	0	0	25.3069	1.8374	0	0	0	3	0	0.62	0.39	0.336
1761	70	1	1	55	172	2	2	0	1	0	151	31.1695	67	3	0	0	0	0	0	0	0	0	18.5911	1.6003	0	0	0	3	0	2.14	2.26	2.158
1762	63	2	2	87	175	2	2	1	1	0	83	83.8682	56	3	0	0	0	0	0	0	0	1	28.4082	2.0282	0	0	0	3	0	3.77	1.59	0.79
1763	69	2	1	65	170	1	2	1	0	0	56	100.747	67	3	0	0	0	0	0	0	0	0	22.4913	1.7161	0	0	0	3	0	0.8	0.49	0.684
1764	62	2	1	65	172	2	2	1	0	0	57	108.738	65	3	0	0	0	0	0	0	0	1	21.9713	1.7283	0	0	0	3	0	2.21	0.79	0.435
1765	76	1	2	58	156	1	2	1	0	0	69	55.9016	56	3	0	0	0	0	0	0	0	1	23.833	1.5411	0	0	0	3	0	4.86	2.01	1.361
1766	67	2	1	65	168	1	2	1	0	0	60	96.6789	65	3	0	0	0	0	0	0	0	0	23.03	1.7039	0	0	0	3	0	0.76	0.52	0.453
1767	62	2	2	58	160	1	2	1	0	1	52	90.4034	62	3	0	0	0	0	0	0	0	0	22.6562	1.5655	0	0	0	3	0	0.82	0.42	0.866
1768	64	2	2	55	156	1	2	1	1	0	46	94.4244	65	3	0	0	0	0	0	0	0	0	22.6003	1.5027	0	0	0	3	0	0.87	0.37	1.072
1769	64	2	1	76	171	2	1	1	1	0	96	73.5534	68	3	0	0	0	0	0	0	0	0	25.9909	1.863	0	0	1	3	0	0.84	0.75	0.419
1770	63	2	1	72	168	4	1	1	0	1	96	70.599	56	3	0	0	0	0	0	0	0	1	25.5102	1.7935	0	0	0	3	0	3.81	1.94	0.451
1771	73	1	1	67	170	1	1	1	0	0	82	66.9241	65	3	0	0	0	0	0	0	0	0	23.1834	1.7417	0	0	0	3	0	0.97	0.91	0.799
1772	63	2	1	60	172	2	2	1	0	0	79	71.4927	61	3	0	0	0	0	0	0	0	1	20.2812	1.6643	0	0	0	3	0	3.05	0.68	0.388
1773	68	2	1	70	175	2	2	1	0	0	52	118.488	62	3	0	0	0	0	0	0	0	0	22.8571	1.8106	0	0	0	3	0	0.87	0.51	0.559
1774	62	2	1	78	175	1	2	1	0	0	65	114.425	56	3	0	0	0	0	0	0	0	0	25.4694	1.913	0	0	0	3	0	0.66	0.61	0.366
1775	65	2	1	94	175	2	2	1	0	0	91	94.7097	68	3	0	0	0	0	0	0	0	0	30.6939	2.1178	0	1	0	3	0	0.8	0.72	0.451
1776	62	2	2	70	158	1	2	1	1	0	68	83.4352	65	3	0	0	0	0	0	0	0	0	28.0404	1.7069	0	0	0	3	0	1.11	0.49	0.769
1777	73	1	1	63	173	2	2	1	0	0	86	60.0017	60	3	0	0	0	0	0	0	0	0	21.0498	1.7088	0	0	0	3	0	1.35	1.11	0.935
1778	76	1	1	58	168	2	2	1	0	0	135	33.6141	65	3	0	0	0	0	0	0	0	0	20.5499	1.6143	0	0	0	3	0	2.53	2.3	2.237
1779	55	2	1	65	175	2	2	1	0	1	74	91.274	60	3	0	0	0	0	0	0	0	0	21.2245	1.7466	0	0	0	3	0	0.69	0.44	0.432
1780	76	1	1	65	169	2	3	1	0	0	133	38.2374	64	3	0	0	0	0	0	0	0	0	22.7583	1.71	0	0	0	3	0	2.36	2.73	1.227
1781	63	2	1	84	170	2	2	0	0	0	68	116.281	60	3	0	0	0	0	0	0	0	0	29.0657	1.9593	0	0	0	3	0	0.75	0.59	0.386
1782	64	2	2	59	160	2	2	1	0	1	51	91.361	66	3	0	0	0	0	0	0	0	0	23.0469	1.5783	0	0	0	3	0	0.96	0.39	0.959
1783	55	2	1	69	165	2	2	0	1	0	64	112.03	67	3	0	0	0	0	0	0	0	0	25.3444	1.7368	0	0	0	3	0	0.98	0.34	0.44
1784	56	2	1	65	170	2	2	1	1	0	75	88.9976	65	3	0	0	0	0	0	0	0	0	22.4913	1.7161	0	0	0	3	0	0.98	0.44	0.47
1785	75	1	1	70	175	2	2	0	0	0	112	49.6638	65	3	0	0	0	0	0	0	0	0	22.8571	1.8106	0	0	0	3	0	2.46	1.56	1.217
1786	63	2	1	78	170	1	3	0	0	0	79	92.9405	50	3	0	0	0	0	0	0	0	0	26.9896	1.8825	0	0	0	3	0	0.86	1.11	0.371
1787	80	1	1	65	170	1	2	0	0	0	96	49.6638	60	3	0	0	0	0	0	0	0	0	22.4913	1.7161	0	0	0	3	0	2.55	1.66	1.136
1788	63	2	1	71	172	1	2	1	0	0	83	80.5226	66	3	0	0	0	0	0	0	0	0	23.9995	1.8051	0	0	0	3	0	0.92	0.63	0.446
1789	63	2	1	60	168	2	2	1	0	0	78	72.4093	62	3	0	0	0	0	0	0	0	0	21.2585	1.6399	0	0	0	3	0	1.02	0.65	0.564
1790	80	1	1	79	175	3	2	1	0	0	116	49.9536	60	3	0	0	0	0	0	0	0	0	25.7959	1.9258	0	0	0	3	0	3.4	2.27	1.583
1791	64	2	1	66	168	2	3	0	0	0	101	60.7132	42	3	0	0	0	0	0	0	0	1	23.3844	1.7167	0	0	0	3	0	3.97	3.8	0.644
1792	73	1	1	60	172	2	2	0	1	1	72	68.2559	58	3	0	0	0	0	0	0	0	1	20.2812	1.6643	0	0	0	3	0	4.02	1.8	1.651
1793	58	2	1	56	170	2	2	1	0	0	123	45.6398	65	3	0	0	0	0	0	0	0	0	19.3772	1.6009	0	0	0	3	0	1.62	1.02	0.718
1794	70	1	2	60	160	1	2	1	1	0	71	61.4691	61	3	0	0	0	0	0	0	0	1	23.4375	1.5911	0	0	0	3	0	5.77	1.46	1.416
1795	47	2	1	75	176	2	2	1	0	0	67	127.267	66	3	0	0	0	0	0	0	0	1	24.2123	1.8807	0	0	0	3	0	2.09	0.53	0.246
1796	71	1	2	56	152	2	2	1	1	0	179	22.4311	55	3	0	0	0	3	0	0	0	0	24.2382	1.4911	0	0	0	3	0	3.84	4.96	3.569
1797	73	1	2	45	160	1	2	1	1	0	78	40.166	60	3	0	0	0	0	0	0	0	0	17.5781	1.3991	0	0	0	3	0	2.6	0.98	2.448
1798	66	2	1	60	170	2	2	0	0	0	56	96.9263	57	3	0	0	0	0	0	0	0	1	20.7612	1.6521	0	0	0	3	0	2.47	1.12	0.63
1799	72	1	1	80	172	1	2	1	1	0	115	57.8293	55	3	0	0	0	0	0	0	0	0	27.0416	1.9203	0	0	0	3	0	1.18	1.95	1.255
1800	68	2	1	66	171	1	2	1	0	0	77	75.4453	68	3	0	0	0	0	0	0	0	0	22.571	1.735	0	0	0	3	0	1.05	0.64	0.653
1801	63	2	1	72	171	1	2	1	0	0	75	90.3667	65	3	0	0	0	0	0	0	0	0	24.623	1.8118	0	0	0	3	0	0.68	0.57	0.436
1802	70	1	2	65	159	1	2	1	1	0	45	105.067	58	3	0	0	0	0	0	0	0	0	25.711	1.649	0	0	0	3	0	1.46	0.55	1.254
1803	73	1	1	68	170	1	2	1	0	0	64	87.0263	65	3	0	0	0	0	0	0	0	0	23.5294	1.7545	0	0	0	3	0	0.9	0.68	0.845
1804	57	2	1	76	176	2	1	1	0	0	84	91.8035	48	2	0	0	0	0	0	0	0	0	24.5351	1.8935	0	0	0	2	0	0.76	0.86	0.245
1805	76	1	1	60	169	2	1	0	0	0	98	47.9018	54	3	0	0	0	0	0	0	0	0	21.0077	1.646	0	0	0	3	0	2.04	1.77	1.253
1806	73	1	1	82	173	2	2	1	1	0	151	44.4793	61	3	0	0	0	0	0	0	0	0	27.3982	1.952	0	0	0	3	0	2.33	2.96	1.453
1807	69	2	2	60	158	2	2	1	0	1	74	59.8196	70	3	0	0	1	0	0	0	0	0	24.0346	1.5789	0	0	0	3	0	1.5	0.6	1.378
1808	57	2	2	43	152	2	2	1	0	0	62	59.8164	53	3	0	0	0	0	0	0	0	0	18.6115	1.3247	0	0	0	3	0	1.16	0.53	0.821
1809	77	1	1	65	165	2	2	1	1	0	81	61.8039	52	3	0	0	0	0	0	0	0	0	23.8751	1.6856	0	0	0	3	0	2.14	1.49	1.63
1810	65	2	1	63	170	2	2	1	0	0	101	57.1909	58	3	0	0	0	0	0	0	0	0	21.7993	1.6905	0	0	0	3	0	1.08	1.12	0.499
1811	70	1	1	60	172	2	2	1	0	0	82	62.6155	66	3	0	0	0	0	0	0	0	0	20.2812	1.6643	0	0	0	3	0	1.24	0.79	0.83
1812	73	1	1	70	160	1	2	1	0	0	119	48.1806	65	3	0	0	0	0	0	0	0	0	27.3438	1.7191	0	0	0	3	0	2.1	1.62	1.376
1813	58	2	2	65	156	1	2	1	0	0	68	81.4487	66	3	0	0	0	0	0	0	0	0	26.7094	1.6307	0	0	0	3	0	1.05	0.41	0.533
1814	74	1	1	55	151	2	3	0	0	0	68	65.2596	37	3	1	0	0	0	0	0	0	0	24.1217	1.4722	0	0	0	3	0	2.98	4.64	2.642
1815	73	1	1	67	171	2	2	0	0	0	82	66.9241	65	3	0	0	0	0	0	0	0	0	22.913	1.7478	0	0	0	3	0	1.35	0.91	0.883
1816	66	2	1	55	155	2	1	1	1	0	63	78.977	62	3	0	0	0	0	0	0	0	0	22.8928	1.4966	0	0	0	3	0	1.26	0.57	1.088
1817	68	2	1	80	175	2	2	0	1	1	66	106.69	68	3	0	0	0	0	0	0	0	0	26.1224	1.9386	0	0	0	3	0	1.23	0.54	0.888
1818	76	1	1	86	168	3	2	1	1	0	62	108.526	62	3	0	0	0	0	0	0	0	0	30.4705	1.9727	0	1	0	3	0	1.31	0.8	1.101
1819	63	2	1	65	165	2	1	1	1	0	70	87.4083	64	3	0	0	0	0	0	0	0	0	23.8751	1.6856	0	0	0	3	0	0.6	0.62	0.437
1820	73	1	1	68	172	3	2	1	0	0	82	67.923	68	3	0	0	0	0	0	1	0	0	22.9854	1.7667	0	0	0	3	0	1.62	0.83	1.045
1821	50	2	1	100	175	1	3	1	0	0	120	91.687	58	3	0	0	0	0	0	0	0	0	32.6531	2.1946	0	1	0	3	0	0.58	1.06	0.307
1822	65	2	1	63.9	171	3	1	1	1	1	104	56.3346	67	3	0	0	0	0	0	0	0	1	21.8529	1.70812	0	0	0	3	0	3.12	2.06	1.047
1823	73	1	1	65	180	2	2	0	0	1	70	76.0566	68	3	0	0	0	0	0	0	0	0	20.0617	1.7771	0	0	0	3	0	1	1.31	1.058
1824	73	1	2	71	160	2	1	1	0	0	74	66.7986	59	3	0	0	0	0	0	0	0	0	27.7344	1.7319	0	0	0	3	0	1.35	0.95	1.031
1825	66	2	1	65	165	2	2	0	0	0	79	74.4329	65	3	0	0	0	0	0	0	0	0	23.8751	1.6856	0	0	0	3	0	1.11	0.67	0.637
1826	60	2	1	73	172	2	1	0	0	0	92	77.6018	60	1	0	0	0	0	0	0	0	0	24.6755	1.8307	0	0	0	1	0	0.75	0.77	0.247
1827	69	2	1	75	172	2	2	1	0	0	108	60.2757	63	3	0	0	0	0	0	0	0	0	25.3515	1.8563	0	0	0	3	0	1.21	1.25	0.777
1828	59	2	1	82	180	1	3	0	0	0	79	102.782	67	3	0	0	0	0	0	0	0	0	25.3086	1.9947	0	0	0	3	0	0.58	0.59	0.276
1829	75	1	1	68	168	2	2	1	0	0	91	59.3783	65	3	0	0	0	0	0	0	0	0	24.093	1.7423	0	0	0	3	0	1.43	1.12	1.061
1830	81	1	1	60	172	3	2	1	0	1	97	44.6147	70	3	0	0	0	0	0	0	0	1	20.2812	1.6643	0	0	0	3	0	9.97	2.49	2.367
1831	48	2	1	63	170	1	3	1	1	0	67	105.755	57	3	0	0	0	0	0	0	0	0	21.7993	1.6905	0	0	0	3	0	0.83	0.44	0.359
1832	71	1	1	62	170	2	2	1	0	1	138	37.8973	69	3	0	0	0	0	0	0	0	0	21.4533	1.6777	0	0	0	3	0	2.2	1.81	1.928
1833	75	1	2	56	149	1	2	1	0	1	42	90.057	70	3	0	0	0	0	0	0	0	0	25.2241	1.4728	0	0	0	3	0	1.18	0.25	4.146
1834	63	2	1	67	165	2	2	1	1	1	97	65.019	56	3	0	0	0	0	0	0	0	1	24.6097	1.7112	0	0	0	3	0	4.29	1.97	0.965
1835	75	1	1	48	170	1	2	1	0	0	78	48.8998	61	3	0	0	0	0	0	0	0	0	16.609	1.4985	0	0	0	3	0	2.22	1.02	1.619
1836	72	1	1	62	165	1	2	1	1	0	94	54.8302	59	3	0	0	0	0	0	0	0	0	22.7732	1.6472	0	0	0	3	0	1.18	1.25	1.38
1837	53	2	1	67	168	2	2	1	0	0	113	63.0612	35	3	0	0	0	0	0	0	0	1	23.7387	1.7295	0	0	0	3	0	3.81	7.28	0.579
1838	60	2	2	68	160	3	3	0	0	0	55	102.778	51	3	0	0	0	0	0	0	0	0	26.5625	1.6935	0	0	0	3	0	0.97	0.66	0.457
1839	56	2	2	54	156	3	1	1	0	0	67	70.35	62	2	0	0	0	0	0	0	0	0	22.1893	1.4899	0	0	0	2	0	1.12	0.43	0.467
1840	70	1	1	80	170	3	1	1	0	0	86	79.6043	42	3	0	0	0	0	0	0	0	1	27.6817	1.9081	0	0	0	3	0	4.84	3.13	0.656
1841	74	1	1	62	166	2	2	1	0	0	98	51.0454	56	3	0	0	0	0	0	0	0	0	22.4996	1.6533	0	0	0	3	0	1.39	1.56	1.245
1842	52	2	1	57	160	2	3	0	0	0	106	57.8493	54	3	0	0	0	0	0	0	0	0	22.2656	1.5527	0	0	0	3	0	0.87	1.03	0.366
1843	64	2	1	75.5	170	1	2	1	0	0	75	93.5289	57	3	0	0	0	0	0	0	0	0	26.1246	1.8505	0	0	0	3	0	0.7	0.74	0.449
1844	77	1	2	50	148	1	2	1	0	0	93	35.196	65	3	0	0	0	0	0	0	0	0	22.8269	1.3899	0	0	0	3	0	2.9	1.24	2.697
1845	69	2	1	60	170	1	3	0	1	0	100	52.0782	46	3	0	0	0	0	0	0	0	0	20.7612	1.6521	0	0	0	3	0	1.38	2.13	1.153
1846	72	1	1	75	168	2	2	1	0	0	98	63.6196	57	3	0	0	0	0	0	0	0	0	26.5731	1.8319	0	0	0	3	0	1.31	1.41	0.856
1847	52	2	1	75	177	2	2	0	0	0	86	93.8193	67	3	0	0	0	0	0	0	0	0	23.9395	1.8868	0	0	0	3	0	0.69	0.43	0.268
1848	62	2	1	85	170	1	1	1	0	0	94	86.2248	56	3	0	0	0	0	0	0	0	0	29.4118	1.9721	0	0	0	3	0	0.53	0.96	0.36
1849	73	1	1	78	178	1	2	1	0	0	72	88.7327	63	3	0	0	0	0	0	0	0	0	24.6181	1.9313	0	0	0	3	0	0.9	0.82	0.523
1850	62	2	1	80	168	2	2	1	0	1	87	87.6823	63	3	0	0	0	0	0	0	0	0	28.3447	1.8959	0	0	0	3	0	0.73	0.7	0.517
1851	65	2	1	71	169	2	1	1	1	1	119	54.704	50	3	0	0	0	0	0	0	0	0	24.8591	1.7868	0	0	0	3	0	1.18	1.87	1.129
1852	43	2	1	80	168	1	3	1	1	0	78	121.622	60	3	0	0	0	0	0	0	0	0	28.3447	1.8959	0	0	0	3	0	0.58	0.4	0.216
1853	62	2	1	76	170	1	3	1	1	1	49	147.897	60	3	0	0	0	0	0	0	0	1	26.2976	1.8569	0	0	0	3	0	0.87	0.96	0.441
1854	79	1	2	56	167	3	2	1	0	1	55	64.5388	62	3	0	0	0	0	0	0	0	0	20.0796	1.5826	0	0	0	3	0	2.38	0.8	2.372
1855	61	2	1	85	170	2	2	1	1	0	73	112.453	44	3	0	0	0	0	0	0	0	1	29.4118	1.9721	0	0	0	3	0	2.92	1.78	0.495
1856	75	1	1	48	155	2	2	0	0	0	65	58.6797	52	3	0	0	0	0	0	0	0	0	19.9792	1.407	0	0	0	3	0	1.43	1.08	2.089
1857	69	2	2	60	162	3	2	0	1	0	64	69.1664	70	3	0	0	0	0	0	0	0	0	22.8624	1.6033	0	0	0	3	0	1.8	0.51	1.286
1858	68	2	1	52	170	2	2	1	0	0	71	64.465	67	3	0	0	0	0	0	0	0	0	17.9931	1.5497	0	0	0	3	0	1.17	0.6	0.909
1859	56	2	1	73	170	2	2	0	1	0	76	98.636	51	3	0	0	0	0	0	0	0	0	25.2595	1.8185	0	0	0	3	0	0.69	0.67	0.372
1860	61	2	1	78.5	170	2	2	1	1	0	73	103.853	63	3	0	0	0	0	0	0	0	0	27.1626	1.8889	0	0	0	3	0	1.01	0.54	0.468
1861	62	2	1	78	170	2	2	1	0	0	74	100.509	61	3	0	0	0	0	0	0	0	0	26.9896	1.8825	0	0	0	3	0	0.73	0.61	0.386
1862	68	2	1	68	171	1	3	1	1	0	118	50.7231	57	3	0	0	0	0	0	0	0	0	23.255	1.7606	0	0	0	3	0	0.98	2	1.054
1863	69	2	1	69	172	1	3	1	1	0	84	71.2976	53	3	0	0	0	0	0	1	0	0	23.3234	1.7795	0	0	0	3	0	1.44	1.36	1.049
1864	52	2	1	70	170	3	2	0	1	0	72	104.591	64	3	0	0	0	0	0	0	0	0	24.2215	1.7801	0	0	0	3	0	0.83	0.38	0.381
1865	71	1	1	80	163	1	1	1	0	0	88	76.6837	67	3	0	0	0	0	0	0	0	0	30.1103	1.8654	0	1	0	3	0	0.92	0.88	0.643
1866	82	1	1	55	172	2	2	0	1	0	102	38.2329	61	3	0	0	0	0	0	0	0	0	18.5911	1.6003	0	0	0	3	0	2.99	1.9	2.981
1867	82	1	1	60	165	3	2	0	0	0	74	57.4903	65	3	0	0	0	0	0	0	0	1	22.0386	1.6216	0	0	0	3	0	6.13	1.4	2.179
1868	75	1	1	63	165	1	2	0	0	0	91	55.0122	58	2	0	0	0	0	0	0	0	0	23.1405	1.66	0	0	0	2	0	1.28	1.37	1.034
1869	68	2	1	74	173	1	2	1	1	0	71	91.7387	58	3	0	0	0	0	0	0	0	0	24.7252	1.8496	0	0	0	3	0	0.78	0.78	0.734
1870	73	1	1	65	167	1	3	1	0	0	79	67.3919	50	3	0	0	0	0	0	1	0	0	23.3067	1.6978	0	0	0	3	0	1.55	1.58	1.158
1871	62	2	1	80	172	1	1	1	1	0	341	22.3706	68	3	0	0	0	0	1	0	0	0	27.0416	1.9203	0	0	0	3	0	1.49	35.46	1.861
1872	72	1	1	55	168	2	3	1	0	1	79	57.875	52	3	0	0	0	0	0	0	0	0	19.487	1.5759	0	0	0	3	0	1.22	1.44	1.305
1873	61	2	1	65	170	2	2	1	0	1	112	56.0492	50	3	0	0	0	0	0	0	0	0	22.4913	1.7161	0	0	0	3	0	1.31	1.46	0.766
1874	69	2	1	83	170	2	2	1	1	0	85	84.7548	59	3	0	0	0	0	0	0	0	0	28.7197	1.9465	0	0	0	3	0	1.71	0.98	0.759
1875	73	1	2	51	156	2	2	1	1	1	72	49.3149	61	3	0	0	0	0	0	0	0	0	20.9566	1.4515	0	0	0	3	0	2.88	0.87	2.811
1876	71	1	1	80	173	4	2	1	0	0	96	70.2934	51	3	0	0	0	0	0	1	0	1	26.7299	1.9264	0	0	0	3	0	5.85	2.95	0.886
1877	67	2	1	70	168	1	2	0	0	0	89	70.1904	58	1	0	0	2	0	0	0	0	0	24.8016	1.7679	0	0	0	1	0	1.02	1	0.614
1878	68	2	1	73	167	2	2	0	1	1	77	83.4471	66	3	0	0	0	0	0	0	0	0	26.1752	1.8002	0	0	0	3	0	1.17	0.68	1.913
1879	65	2	1	79	165	1	1	0	1	0	95	76.245	66	3	0	0	0	0	0	0	0	0	29.0174	1.8648	0	0	0	3	0	1.1	0.81	0.619
1880	64	2	1	65	169	1	2	1	0	1	95	63.5697	51	3	0	0	0	0	0	0	0	0	22.7583	1.71	0	0	0	3	0	0.94	1.2	0.768
1881	71	1	2	61	158	3	2	0	1	0	150	29.1577	45	2	0	0	0	0	0	0	0	0	24.4352	1.5917	0	0	0	2	0	6.21	4.22	2.552
1882	70	1	1	70	170	3	2	0	0	0	81	73.9533	55	3	0	0	0	0	0	0	0	0	24.2215	1.7801	0	0	0	3	0	1.49	1.07	0.707
1883	65	2	1	72	170	2	2	1	0	0	192	34.3826	60	3	0	0	0	0	0	0	0	0	24.9135	1.8057	0	0	0	3	0	1.86	4.3	1.043
1884	79	1	2	51	156	2	2	0	0	0	51	63.3863	61	3	0	0	0	0	0	0	0	0	20.9566	1.4515	0	0	0	3	0	1.98	0.77	2.3
1885	77	1	1	94	173	3	2	1	0	0	106	68.2982	58	3	0	0	0	0	0	0	0	1	31.4077	2.1056	0	1	0	3	0	5.36	3.47	1.121
1886	78	1	1	52	153	2	2	1	0	1	62	63.5697	43	3	0	0	0	0	0	0	0	0	22.2137	1.446	0	0	0	3	0	2.12	1.48	3.277
1887	40	2	1	87	170	2	3	1	0	0	83	128.141	57	3	0	0	0	0	0	0	0	0	30.1038	1.9977	0	1	0	3	0	0.65	0.43	0.22
1888	50	2	1	87.7	173	2	2	1	0	0	70	137.845	64	3	0	0	0	0	0	0	0	0	29.3027	2.02496	0	0	0	3	0	0.69	0.34	0.23
1889	74	1	1	87	177	3	2	0	0	0	75	93.5941	66	3	0	0	0	0	0	0	0	0	27.7698	2.0404	0	0	0	3	0	1.24	0.82	0.744
1890	65	2	1	62	165	2	2	1	0	0	94	60.4744	62	3	0	0	0	0	0	0	0	0	22.7732	1.6472	0	0	0	3	0	1.08	0.9	0.694
1891	41	2	1	73	172	3	1	1	0	0	78	113.269	69	3	0	0	0	0	0	0	0	0	24.6755	1.8307	0	0	0	3	0	0.67	0.24	0.241
1892	65	2	1	73	170	2	2	1	0	0	81	82.6315	50	3	0	0	0	0	0	0	0	0	25.2595	1.8185	0	0	0	3	0	1.47	1.03	0.498
1893	77	1	2	50	150	4	2	1	0	1	161	20.3306	39	3	0	0	0	0	0	0	0	0	22.2222	1.4021	0	0	0	3	0	6.69	14.77	6.911
1894	82	1	1	57	172	3	2	0	0	1	67	60.3219	64	3	0	0	0	0	0	0	0	0	19.2672	1.6259	0	0	0	3	0	2.09	1.01	2.339
1895	68	2	1	62	166	2	2	1	1	1	94	58.0555	60	3	0	0	0	0	0	0	0	0	22.4996	1.6533	0	0	0	3	0	1.17	1.06	1.389
1896	53	2	1	75	170	2	2	0	0	0	85	93.8444	47	3	0	0	3	0	0	0	0	0	25.9516	1.8441	0	0	0	3	0	0.95	0.78	0.222
1897	63	2	1	69	167	2	2	1	0	0	49.8	130.424	48	3	0	0	0	0	0	0	0	0	24.7409	1.749	0	0	0	3	0	1.03	0.3	0.466
1898	70	1	1	69	160	2	3	1	0	1	88	67.0982	63	3	0	0	0	0	0	0	0	0	26.9531	1.7063	0	0	0	3	0	1.16	1.13	0.961
1899	61	2	2	60	160	2	2	0	1	0	61	80.7447	62	3	0	0	0	0	0	0	0	0	23.4375	1.5911	0	0	0	3	0	1.7	0.46	0.691
1900	71	1	1	71	167	3	2	1	0	0	67	89.388	57	3	0	0	0	0	0	0	0	0	25.4581	1.7746	0	0	0	3	0	1.14	0.84	0.742
1901	77	1	2	58	158	3	2	1	1	1	93	40.8274	55	3	0	0	0	0	0	0	0	0	23.2335	1.5533	0	0	0	3	0	5.42	1.65	2.972
1902	55	2	1	57	168	2	2	0	0	0	50	118.46	60	3	0	0	0	0	0	0	0	1	20.1956	1.6015	0	0	0	3	0	2.09	0.33	0.408
1903	55	2	1	54	170	3	2	1	1	1	61	91.9877	56	3	0	0	0	0	0	0	0	0	18.6851	1.5753	0	0	0	3	0	0.83	0.44	0.747
1904	68	2	1	65.7	176	1	1	1	1	0	78	74.1396	69	3	0	0	0	0	0	0	0	0	21.21	1.76166	0	0	0	3	0	1.2	0.64	0.724
1905	59	2	1	75	173	4	2	0	1	0	98	75.7821	44	3	0	0	0	0	0	0	0	0	25.0593	1.8624	0	0	0	3	0	1.99	1.29	0.549
1906	61	2	1	61	160	2	2	1	0	0	76	77.5158	66	3	0	0	0	0	0	0	0	1	23.8281	1.6039	0	0	0	3	0	2.89	1	0.547
1907	73	1	1	77	164	2	3	1	0	0	87	72.4925	68	3	0	0	0	0	0	0	0	0	28.6288	1.8331	0	0	0	3	0	1.26	0.08	0.833
1908	77	1	1	52	162	1	1	0	0	1	75	53.3985	65	3	0	0	0	0	0	0	0	0	19.8141	1.5009	0	0	0	3	0	1.09	0.94	2.127
1909	69	2	2	50	153	2	2	0	0	0	78	47.2933	67	3	0	0	0	0	0	0	0	0	21.3593	1.4204	0	0	0	3	0	2.08	0.7	1.423
1910	73	1	1	61.4	170	2	2	0	0	0	50	100.582	62	3	0	0	1	0	0	0	0	1	21.2457	1.67002	0	0	0	3	0	3	1.14	0.927
1911	62	2	2	60	151	2	2	0	0	0	63	77.1918	55	3	0	0	0	0	0	0	0	0	26.3146	1.5362	0	0	0	3	0	1.23	0.6	0.73
1912	79	1	1	58	165	3	3	1	0	0	60	72.0864	40	3	0	0	0	0	0	0	0	0	21.3039	1.596	0	0	0	3	0	2.44	1.92	1.895
1913	73	1	1	66	161	1	3	0	0	1	88	61.4303	67	3	0	0	0	0	0	0	0	0	25.462	1.674	0	0	0	3	0	1.13	1.12	1.349
1914	66	2	1	68	161	2	2	1	0	1	69	89.1535	65	3	0	0	0	0	0	0	0	0	26.2336	1.6996	0	0	0	3	0	0.82	0.58	0.81
1915	73	1	1	70	169	2	2	0	1	0	104	55.1298	51	3	0	0	0	0	0	0	0	1	24.5089	1.774	0	0	0	3	0	4.02	3.56	1.352
1916	54	2	1	59	176	1	2	0	0	0	80	77.5367	66	3	0	0	0	0	0	0	0	0	19.047	1.6759	0	0	0	3	0	0.84	0.43	0.361
1917	76	1	1	47	150	2	2	0	0	0	77	47.7566	32	3	0	0	0	0	0	0	0	1	20.8889	1.3637	0	0	0	3	0	9.82	9.74	3.533
1918	44	2	1	77.6	174	2	2	1	0	0	76	119.83	44	3	0	0	0	0	0	0	0	0	25.6309	1.90178	0	0	0	3	0	0.95	0.54	0.278
1919	65	2	1	84.7	170	2	2	1	1	0	58	133.895	53	3	0	0	0	0	0	0	0	0	29.308	1.96826	0	0	0	3	0	0.8	0.66	0.553
1920	66	2	1	82	174	2	2	1	0	1	88	84.2965	62	3	0	0	0	0	0	0	0	0	27.0842	1.9581	0	0	0	3	0	1.11	0.08	0.629
1921	63	2	1	78	167	2	2	1	1	1	111	66.1468	60	3	0	0	0	0	0	0	0	0	27.968	1.8642	0	0	0	3	0	1.02	0.12	0.952
1922	58	2	1	64.1	171	2	2	1	1	0	63	101.995	48	3	0	0	1	0	0	0	0	0	21.9213	1.71068	0	0	0	3	0	0.95	0.64	0.506
1923	83	1	1	57.4	168	3	2	1	0	0	77	51.9449	62	3	0	0	0	0	0	0	0	0	20.3373	1.60662	0	0	0	3	0	2.15	1.3	2.046
1924	69	2	1	54	160	3	3	1	1	0	69	67.9281	57	3	0	0	0	0	0	0	0	0	21.0938	1.5143	0	0	0	3	0	1.36	0.96	1.392
1925	75	1	1	86	181	2	2	1	0	0	140	48.8124	53	3	0	0	0	0	0	0	0	1	26.2507	2.052	0	0	0	3	0	7.17	6.13	1.392
1926	69	2	1	69	162	2	3	1	0	0	102	58.7157	52	3	0	0	0	0	0	0	0	0	26.2917	1.7185	0	0	0	3	0	1.13	1.86	0.88
1927	74	1	2	55	155	2	2	1	0	0	105	35.9239	60	3	0	0	0	0	0	0	0	0	22.8928	1.4966	0	0	0	3	0	2.96	1.55	2.043
1928	76	1	1	61	160	2	1	1	0	0	73	65.3783	47	3	0	0	0	0	0	0	0	0	23.8281	1.6039	0	0	0	3	0	1.61	1.46	1.291
1929	66	2	1	79	170	3	2	0	0	0	96	74.4448	60	3	0	0	0	0	0	0	0	0	27.3356	1.8953	0	0	0	3	0	1.33	1.02	0.551
1930	76	1	1	65	170	2	2	1	0	0	118	43.0981	45	3	0	0	0	0	1	0	0	0	22.4913	1.7161	0	0	0	3	0	4.12	6.94	2.099
1931	70	1	2	60.9	168	2	2	1	1	0	75	59.0636	46	3	0	0	0	0	0	0	0	0	21.5774	1.65142	0	0	0	3	0	2.1	1.25	1.404
1932	53	2	1	77	170	2	2	0	1	0	80	102.369	57	3	0	0	0	0	0	0	0	0	26.6436	1.8697	0	0	0	3	0	0.69	0.54	0.366
1933	71	1	2	63	158	3	2	1	1	0	84	53.7744	67	3	0	0	0	0	0	0	0	0	25.2363	1.6173	0	0	0	3	0	1.91	0.82	1.509
1934	71	1	1	70	175	2	2	0	1	1	80	73.8081	68	3	0	0	0	0	0	0	0	0	22.8571	1.8106	0	0	0	3	0	1.28	0.75	1.211
1935	72	1	1	61.9	170	2	3	1	1	0	112	45.9439	52	3	0	0	0	0	0	0	0	0	21.4187	1.67642	0	0	0	3	0	2.12	2.4	1.588
1936	57	2	1	72	170	3	1	0	0	1	72	101.467	57	2	0	0	0	0	0	0	0	0	24.9135	1.8057	0	0	0	2	0	0.67	0.55	0.33
1937	61	2	2	56	163	1	1	1	0	0	54	85.1309	59	3	0	0	0	0	0	0	0	0	21.0772	1.5582	0	0	0	3	0	0.64	0.45	0.562
1938	70	1	1	88	175	2	1	1	1	0	84	89.6496	65	3	0	0	0	0	0	0	0	0	28.7347	2.041	0	0	0	3	0	0.74	0.84	0.69
1939	64	2	1	61	170	1	2	0	1	0	50	113.35	65	3	0	0	0	0	0	0	0	0	21.1073	1.6649	0	0	0	3	0	0.7	0.4	0.698
1940	60	2	1	84.5	175	1	3	0	1	0	77	107.325	57	3	0	0	0	0	0	0	0	0	27.5918	1.9962	0	0	0	3	0	0.58	0.79	0.415
1941	54	2	1	67	170	2	2	1	0	0	74	95.1893	46	3	0	0	0	0	0	0	0	0	23.1834	1.7417	0	0	0	3	0	0.95	0.7	0.352
1942	73	1	1	68	170	4	2	1	0	0	88	63.2918	53	3	0	0	0	0	0	0	0	1	23.5294	1.7545	0	0	1	3	0	6.18	2.64	0.89
1943	70	1	1	86	175	3	3	1	0	0	70	105.134	60	2	0	0	0	0	0	0	0	0	28.0816	2.0154	0	0	0	2	0	1.03	0.93	0.494
1944	64	2	1	60.4	176	3	2	1	0	0	101	55.5617	65	1	0	0	0	0	0	0	0	0	19.499	1.69382	0	0	0	1	0	1.26	0.89	0.458
1945	66	2	2	58	158	3	3	1	1	0	56	79.6411	60	3	0	0	0	0	0	0	0	1	23.2335	1.5533	0	0	0	3	0	4.59	1.23	1.137
1946	68	2	1	71.1	170	3	2	1	0	0	78	80.2332	57	3	0	0	0	0	0	0	0	1	24.6021	1.79418	0	0	0	3	0	4.2	1.11	0.611
